# Supplementary material
Source: publisher figshare collection journal article supplement (https://tandf.figshare.com/ndownloader/files/12935006)
Supplement: Supplementary file 1 [file 12935006]

*Supplementary data for*

**Influence of peripheral substituents on the stability of sandwich-type complexes of crown ether-containing anthraquinoneimines**

Timofey P. Martyanov,a[[1]](#footnote-2) Aleksandra A. Kudrevatykh,b Igor G. Strelnikov,a,c

Lubov S. Klimenko,b Denis V. Korchagin,a Alexander V. Chernyak,a,d and

Evgeny N. Ushakova

aInstitute of Problems of Chemical Physics, Russian Academy of Sciences, 142432 Chernogolovka, Russian Federation; bYugra State University, 628012 Khanty-Mansiysk, Russian Federation; cSaint Petersburg State University, Institute of Chemistry, 198504 St. Petersburg, Russian Federation; dScience Center in Chernogolovka, Russian Academy of Sciences, 142432 Chernogolovka, Russian Federation

TABLE OF CONTENTS

**I** Synthesis of precursors S[2](#__RefHeading___Toc508231506)

**II** **Figures S1–S7:** 1H and 13C NMR spectra of **2** and **3** S[3](#__RefHeading___Toc508231507)

**III** **Figures S8,** **S9:** FT-IR spectra of **2** and **3** S[7](#__RefHeading___Toc508231508)

**IV** **Figures S10–S12:** Absorption spectroscopy data S[8](#__RefHeading___Toc508231509)

**V** **Tables S1, S2:** X-ray diffraction data for the single crystal of compound **2** S[9](#__RefHeading___Toc508231510)

**VI** **Figures S13–S16:** 2D NOESY spectra of **1** and **3** in the absence and in the presence of Ba(ClO4)2 S[12](#__RefHeading___Toc508231511)

**VII** **Table S3:** Cartesian coordinates from DFT calculations in solution S[16](#__RefHeading___Toc508231512)

**VIII** **Tables S4**–**S9:** DFT calculated free energies in solution (*G*soln) S[27](#__RefHeading___Toc508231513)

**IX** **Table S10, Figure S17:** Stacking parameters from DFT calculations in solution S[29](#__RefHeading___Toc508231514)

# **I** Synthesis of precursors

A mixture of 1-(*p*-*tert*-butylphenoxy)-2-amino-9,10-anthraquinone (0.01 mol) and the corresponding acid chloride (0.015 mol) was refluxed in 50 ml of toluene for 1 to 2 hours (TLC control). The reaction mixture was evaporated *in vacuo* to a volume of 3–4 mL, then diethyl ether was added and the precipitate was filtered off and washed with diethyl ether.

**1-(*p*-*tert*-butylphenoxy)-2-pentafluorobenzoylamino-9,10-anthraquinone (4).** Yield 89%, m.p. 214–215C. 1H NMR (CDCl3): ** 10.96 (br.s., 1H, NH), 8.42 (d, 1H, *J* = 8.5, Н-4), 8.21 (d, 1H, *J* = 8.5, H-3), 8.15 (m, 1H, H-5), 7.98 (m, 1H, H-8), 7.85 (m, 2H, H-6,7), 7.26 (d, 2H, *J* = 9, H-3,5), 6.81 (d, 2H, *J* = 9, H-2,6), 1.23 (s, 9H, C(CH3)3). FTIR: ** (cm–1) 3393 (NH), 3090 (C–Har); 2965 (C–Halk), 1688, 1673 (С=О), 1592 (C=Car), 1255 (C–F). Elemental analysis calcd (%) for C31H20F5NO4: С, 65.84; Н, 3.56; F, 16.80; N, 2.48; found: С, 65.81; Н, 3.65; F, 16.64; N, 2.34.

**1-(*p*-*tert*-butylphenoxy)-2-(*p*-nitrobenzoylamino)-9,10-anthraquinone (5).** Yield 86%, m.p. 247–248 C. 1H NMR (CDCl3): ** 10.46 (br.s., 1H, NH), 8.42 (d, 1H, *J* = 8.5, H-4), 8.22–8.27 (m, 3H, H-3,3,5), 8.19 (m, 1H, H-5), 8.05 (m, 1H, H-8), 7.89 (m, 2H, H-6,7), 7.76 (d, 2H, *J* = 9, H-2,6), 7.26 (d, 2H, *J* = 9, H-3,5), 6.80 (d, 2H, *J* = 9, H-2,6,), 1.19 (s, 9H, C(CH3)3). FTIR: ** (cm–1) 3418 (NH), 3070 (C–Har), 2963 (C–Halk), 1693, 1672 (C=O), 1589 (C=Car), 1528 (NO2 as), 1337 (NO2 sy). Elemental analysis calcd (%) for C31H24N2O6: С, 71.53; Н, 4.65; N, 5.38; found: С, 71.28; Н, 4.48; N, 5.49.

# **II** **Figures S1–S7:** 1H and 13C NMR spectra of **2** and **3**

**Figure S1.** 1H NMR spectrum of **2** in CDCl3.

**Figure S2.** 13C NMR spectrum of **2** in CDCl3.

**Figure S3.** 1H NMR spectrum of **3** in CDCl3.


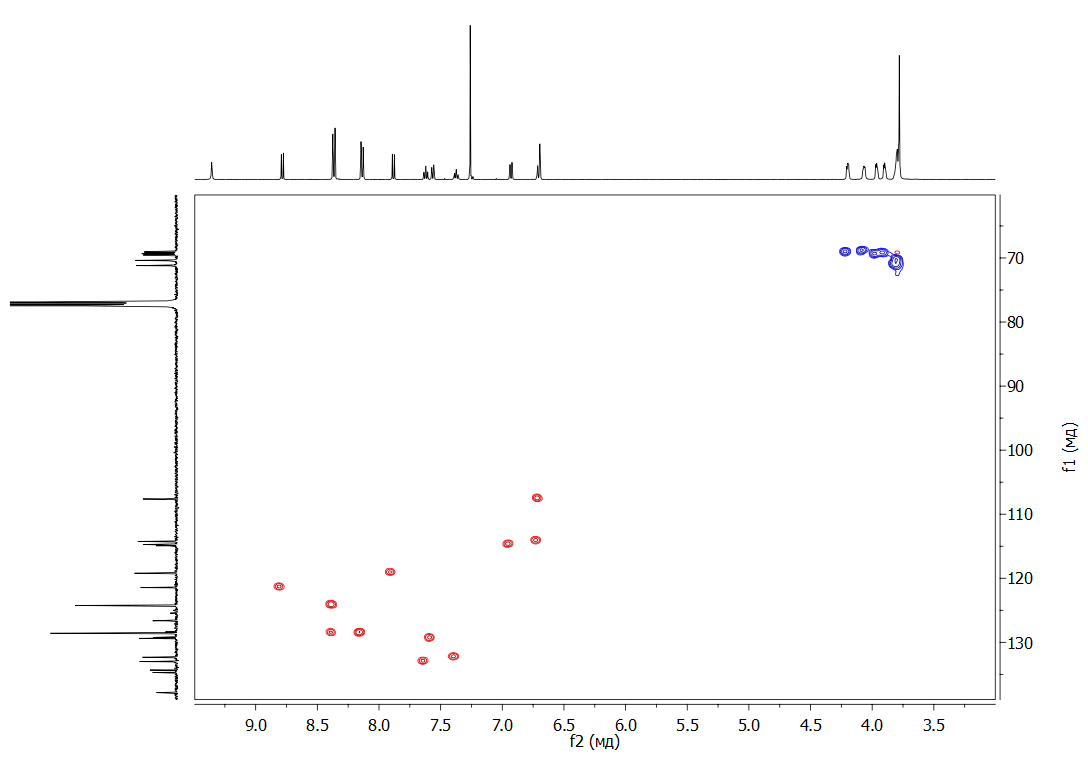


**Figure S4.** HSQC 1H–13C NMR spectrum of **3** in CDCl3 (full view).


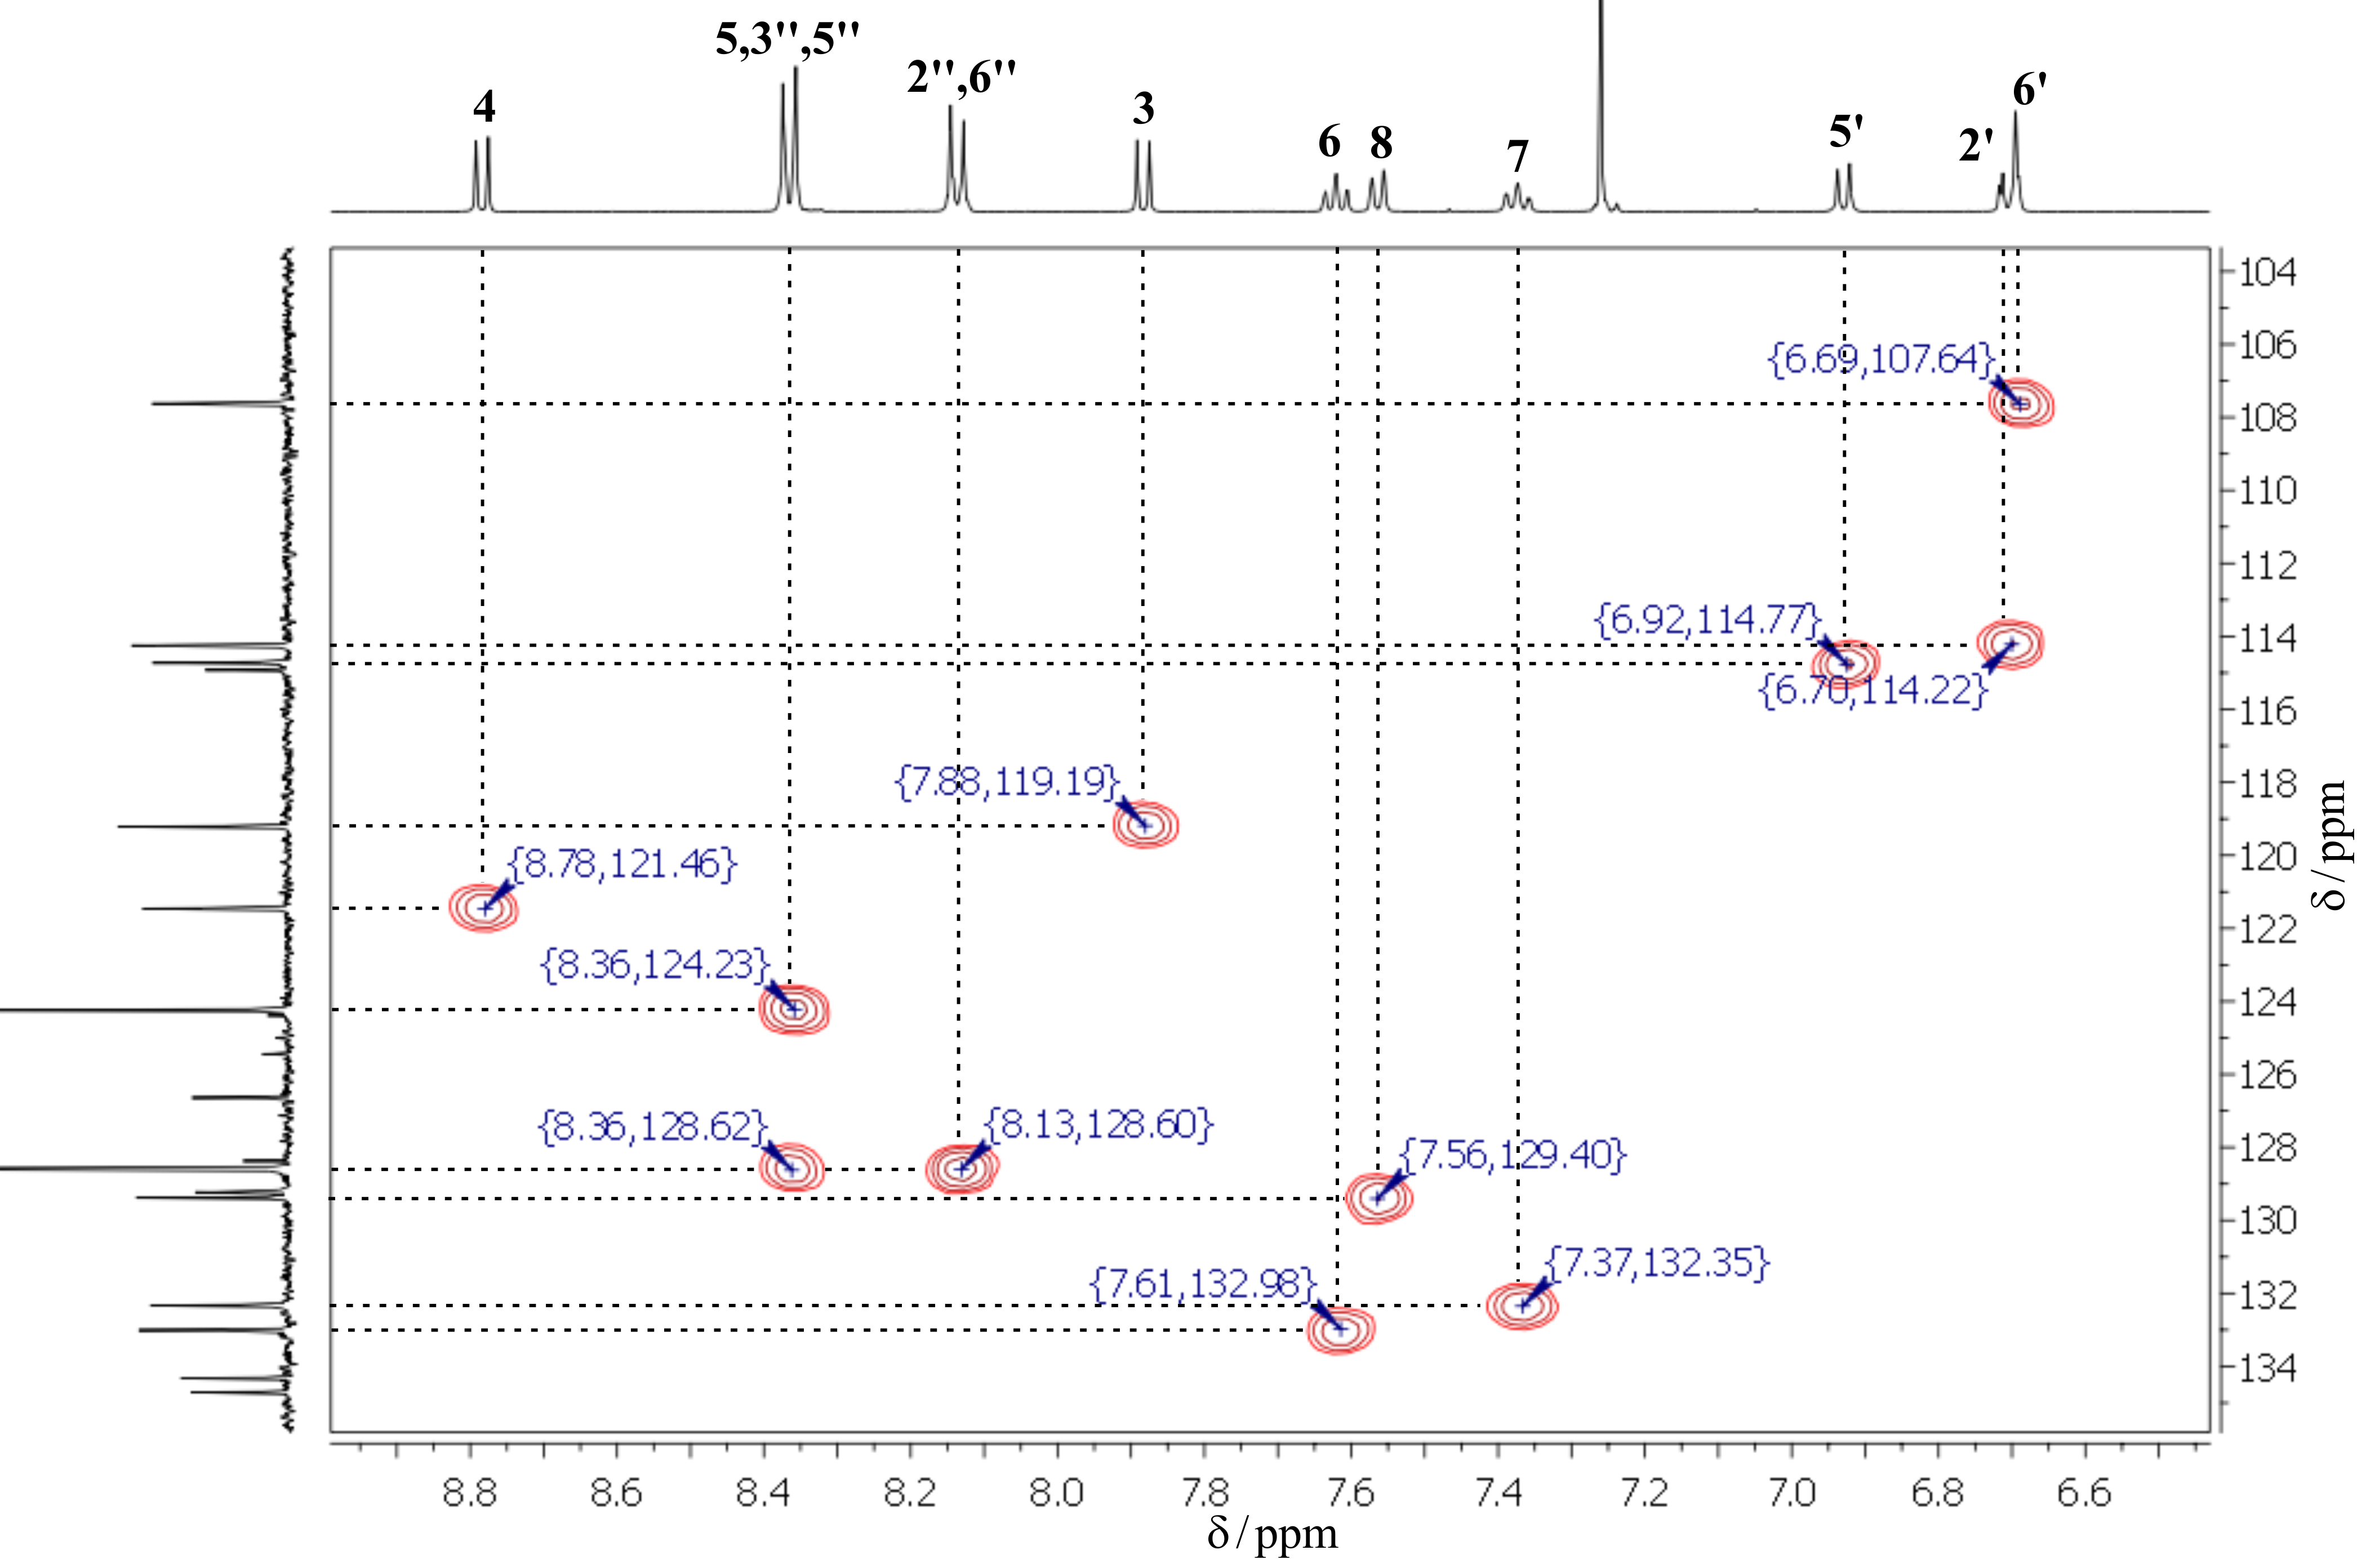


**Figure S5.** HSQC 1H–13C NMR spectrum of **3** in CDCl3 (aromatic region).


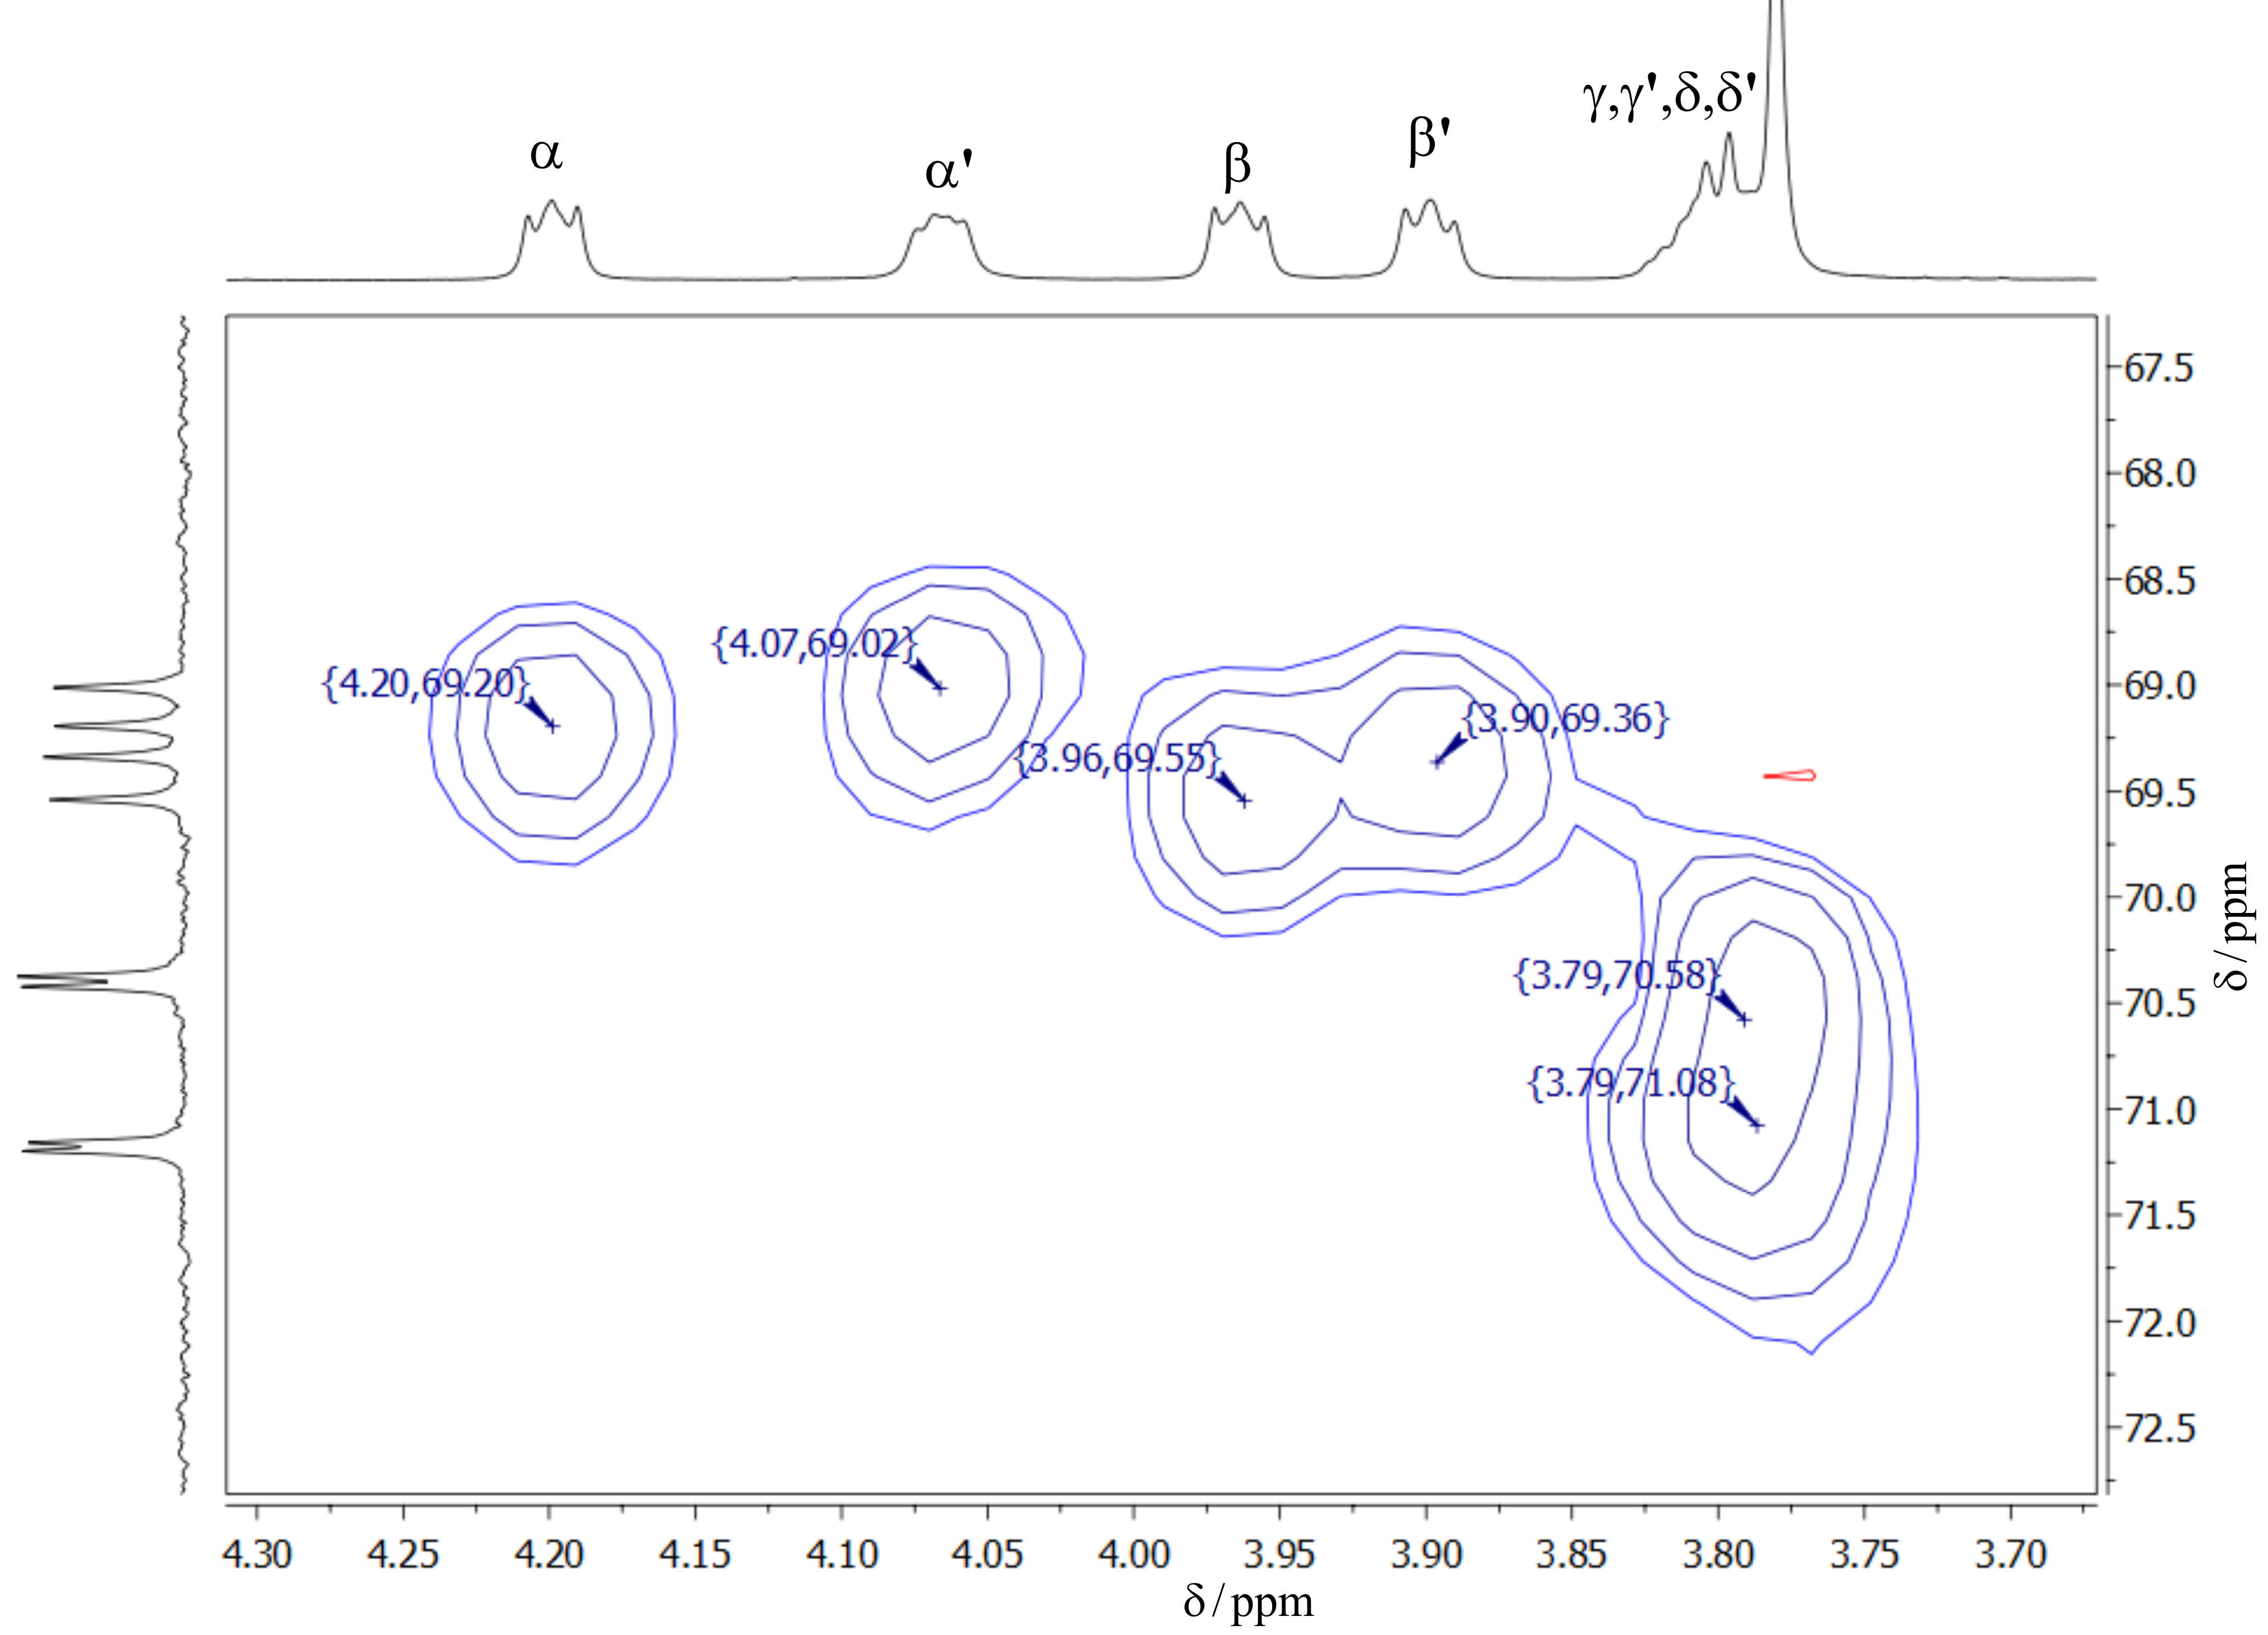


**Figure S6.** HSQC 1H–13C NMR spectrum of **3** in CDCl3 (aliphatic region).

**Figure S7.** 13C NMR spectrum of **3** in CDCl3.

# **III** **Figures S8,** **S9:** FT-IR spectra of **2** and **3**

**Figure S8.** IR spectrum of **2** measured using attenuated total reflection accessory.

**Figure S9.** IR spectrum of **3** measured using attenuated total reflection accessory.

# **IV** **Figures S10–S12:** Absorption spectroscopy data

**Figure S10**. Spectrophotometric titration data for the system **2–**Mg(ClO4)2 in MeCN (4.75 cm cell); the total ligand concentration is 1.8105 M, and the total metal concentration varies incrementally from 0 to 2.0104 M.

**Figure S11**. Absorption spectra of dye **2** and its 1:1 and 2:1 complexes with Ba2+ in MeCN.

|  |  |
| --- | --- |

**Figure S12**. Absorption spectra of dyes **2** and **3** and their 1:1 and 2:1 complexes with Sr2+ in MeCN.

# **V** **Tables S1, S2:** X-ray diffraction data for the single crystal of compound **2**

**Table S1.** Crystal data and structure refinement for compound **2**.

| **Parameters** | **Values** |
| --- | --- |
| Formula (*M*) | C35 H27 F5 N2 O8 (698.59) |
| Crystal system, space group | orthorhombic, Pbca |
| *a*, Å | 8.7617(3) |
| *b*, Å | 24.9924(8) |
| *c*, Å | 26.527(1) |
| *V*, Å3 | 5808.8(4) |
| *Z*, *d*calc (g/cm3) | 8, 1.598 |
| Absorption coefficient *μ*/ mm-1 | 0.134 |
| F(000) | 2880 |
| Crystal size, mm3 | 0.35 x 0.25 x 0.2 |
| *θ* range for data collection, ° | 2.83 - 29.07 |
| Completeness to *θ* = 29.07° | 0.999 |
| Reflections collected / unique / *I>2(I)*] | 28160 / 7744 [0.0567] / 4643 |
| Number of parameters | 474 |
| Final R indices [*I>2(I)*] | 0.0726 (0.1652) |
| R indices (all data) | 0.1224 (0.1908) |
| Goodness-of-fit on *F2* | 1.029 |
| Largest diff. peak and hole*, e·Å-3* | 0.455 / -0.426 |
| CCDC | 1816356 |

**Table S2.** Bond lengths [Å] and angles [°] for **2**.

| *Bond* | *d, Å* | *Bond* | *d, Å* |
| --- | --- | --- | --- |
| F(1)-C(2'') | 1.341(3) | F(2)-C(3'') | 1.341(4) |
| F(5)-C(6'') | 1.339(3) | F(4)-C(5'') | 1.335(4) |
| O(8)-C(15) | 1.217(3) | O(6)-C(10) | 1.225(3) |
| O(7)-C(1) | 1.342(3) | F(3)-C(4'') | 1.345(3) |
| O(4)-C(1B') | 1.403(4) | O(4)-C(1G') | 1.426(4) |
| N(2)-C(15) | 1.362(4) | N(2)-C(2) | 1.406(3) |
| O(5)-C(3') | 1.383(3) | O(5)-C(1A') | 1.428(3) |
| C(10)-C(14) | 1.478(4) | C(10)-C(11) | 1.493(4) |
| N(1)-C(9) | 1.307(4) | N(1)-C(1') | 1.437(4) |
| C(2)-C(1) | 1.417(4) | C(14)-C(13) | 1.415(4) |
| O(1)-C(4') | 1.371(4) | O(1)-C(1A) | 1.419(4) |
| C(2)-C(3) | 1.386(4) | C(14)-C(4) | 1.381(4) |
| C(9)-C(13) | 1.475(4) | C(9)-C(12) | 1.485(4) |
| C(5'')-C(4'') | 1.371(5) | C(5'')-C(6'') | 1.383(4) |
| C(4)-C(3) | 1.392(4) | O(2)-C(2G) | 1.307(13) |
| O(2)-C(1B) | 1.407(4) | O(2)-C(1G) | 1.501(9) |
| C(1)-C(13) | 1.409(4) | C(12)-C(11) | 1.408(4) |
| C(12)-C(8) | 1.409(4) | C(1'')-C(6'') | 1.391(4) |
| C(1'')-C(2'') | 1.386(4) | C(2')-C(3') | 1.376(4) |
| C(2')-C(1') | 1.388(4) | C(6)-C(5) | 1.378(4) |
| C(1'')-C(15) | 1.516(4) | C(1B)-C(1ª) | 1.505(5) |
| C(6)-C(7) | 1.393(5) | C(1')-C(6') | 1.386(4) |
| C(7)-C(8) | 1.383(4) | C(3')-C(4') | 1.397(4) |
| C(5)-C(11) | 1.398(4) | C(4'')-C(3'') | 1.379(5) |
| C(2'')-C(3'') | 1.379(4) | C(4')-C(5') | 1.387(4) |
| C(6')-C(5') | 1.407(4) | C(1D')-O(3) | 1.417(5) |
| C(1A')-C(1B') | 1.495(4) | C(1D')-C(1G') | 1.494(6) |
| C(1D)-C(1G) | 1.477(11) | C(2D)-C(2G) | 1.55(3) |
| O(3)-C(1D) | 1.300(6) | O(3)-C(2D) | 1.486(15) |
| *Bond angle* | *, deg.* | *Bond angle* | *, deg.* |
| C(1B')-O(4)-C(1G') | 113.2(3) | C(14)-C(10)-C(11) | 116.9(2) |
| C(15)-N(2)-C(2) | 126.0(2) | C(9)-N(1)-C(1') | 127.3(2) |
| C(3')-O(5)-C(1A') | 117.6(2) | C(4)-C(14)-C(13) | 120.0(2) |
| O(6)-C(10)-C(14) | 121.9(3) | C(4)-C(14)-C(10) | 119.2(2) |
| O(6)-C(10)-C(11) | 121.2(3) | C(13)-C(14)-C(10) | 120.6(2) |
| C(4')-O(1)-C(1A) | 120.3(2) | N(1)-C(9)-C(12) | 126.8(3) |
| C(3)-C(2)-N(2) | 125.2(3) | C(13)-C(9)-C(12) | 117.6(2) |
| C(3)-C(2)-C(1) | 119.8(2) | F(4)-C(5'')-C(4'') | 120.0(3) |
| N(2)-C(2)-C(1) | 115.0(2) | F(4)-C(5'')-C(6'') | 120.8(3) |
| N(1)-C(9)-C(13) | 115.6(3) | C(4'')-C(5'')-C(6'') | 119.1(3) |
| C(14)-C(4)-C(3) | 121.5(3) | O(7)-C(1)-C(2) | 117.3(2) |
| C(2G)-O(2)-C(1B) | 122.1(7) | C(13)-C(1)-C(2) | 120.3(2) |
| O(7)-C(1)-C(13) | 122.4(3) | C(11)-C(12)-C(8) | 118.4(3) |
| C(1B)-O(2)-C(1G) | 111.9(4) | C(11)-C(12)-C(9) | 119.8(3) |
| C(2)-C(3)-C(4) | 119.8(3) | C(8)-C(12)-C(9) | 121.6(3) |
| C(1)-C(13)-C(14) | 118.6(3) | C(14)-C(13)-C(9) | 119.9(2) |
| C(1)-C(13)-C(9) | 121.1(2) | C(2'')-C(1'')-C(6'') | 116.6(3) |
| O(8)-C(15)-N(2) | 124.7(3) | N(2)-C(15)-C(1'') | 116.2(2) |
| O(8)-C(15)-C(1'') | 119.1(3) | F(5)-C(6'')-C(5'') | 116.3(3) |
| C(2'')-C(1'')-C(15) | 123.8(3) | F(5)-C(6'')-C(1'') | 121.2(2) |
| C(6'')-C(1'')-C(15) | 118.9(3) | C(5'')-C(6'')-C(1'') | 122.5(3) |
| C(3')-C(2')-C(1') | 120.0(3) | C(5)-C(6)-C(7) | 119.5(3) |
| C(6')-C(1')-C(2') | 120.6(3) | C(2')-C(3')-O(5) | 125.4(3) |
| C(6')-C(1')-N(1) | 121.6(3) | C(2')-C(3')-C(4') | 120.5(3) |
| C(2')-C(1')-N(1) | 117.0(3) | O(5)-C(3')-C(4') | 114.0(3) |
| C(8)-C(7)-C(6) | 120.7(3) | C(6)-C(5)-C(11) | 120.8(3) |
| F(3)-C(4'')-C(5'') | 119.6(3) | C(3'')-C(2'')-C(1'') | 121.9(3) |
| F(3)-C(4'')-C(3'') | 120.3(3) | O(2)-C(1B)-C(1A) | 112.8(3) |
| C(5'')-C(4'')-C(3'') | 120.2(3) | F(2)-C(3'')-C(2'') | 120.6(3) |
| F(1)-C(2'')-C(3'') | 117.3(3) | F(2)-C(3'')-C(4'') | 119.6(3) |
| F(1)-C(2'')-C(1'') | 120.8(3) | C(2'')-C(3'')-C(4'') | 119.8(3) |
| C(7)-C(8)-C(12) | 120.4(3) | O(1)-C(4')-C(5') | 124.5(3) |
| C(5)-C(11)-C(12) | 120.0(3) | O(1)-C(4')-C(3') | 116.1(3) |
| C(5)-C(11)-C(10) | 119.4(3) | C(5')-C(4')-C(3') | 119.4(3) |
| C(12)-C(11)-C(10) | 120.5(2) | C(4')-C(5')-C(6') | 120.3(3) |
| C(1')-C(6')-C(5') | 119.0(3) | O(5)-C(1A')-C(1B') | 107.1(2) |
| O(4)-C(1B')-C(1A') | 110.3(3) | C(1D')-O(3)-C(2D) | 97.9(10) |
| O(1)-C(1A)-C(1B) | 107.8(3) | O(3)-C(1D)-C(1G) | 110.3(5) |
| O(3)-C(1D')-C(1G') | 108.9(3) | C(1D)-C(1G)-O(2) | 108.7(6) |
| O(4)-C(1G')-C(1D') | 113.4(3) | O(3)-C(2D)-C(2G) | 105.6(11) |
| C(1D)-O(3)-C(1D') | 120.2(4) | O(2)-C(2G)-C(2D) | 110.4(12) |

# **VI** **Figures S13–S16:** 2D NOESY spectra of **1** and **3** in the absence and in the presence of Ba(ClO4)2


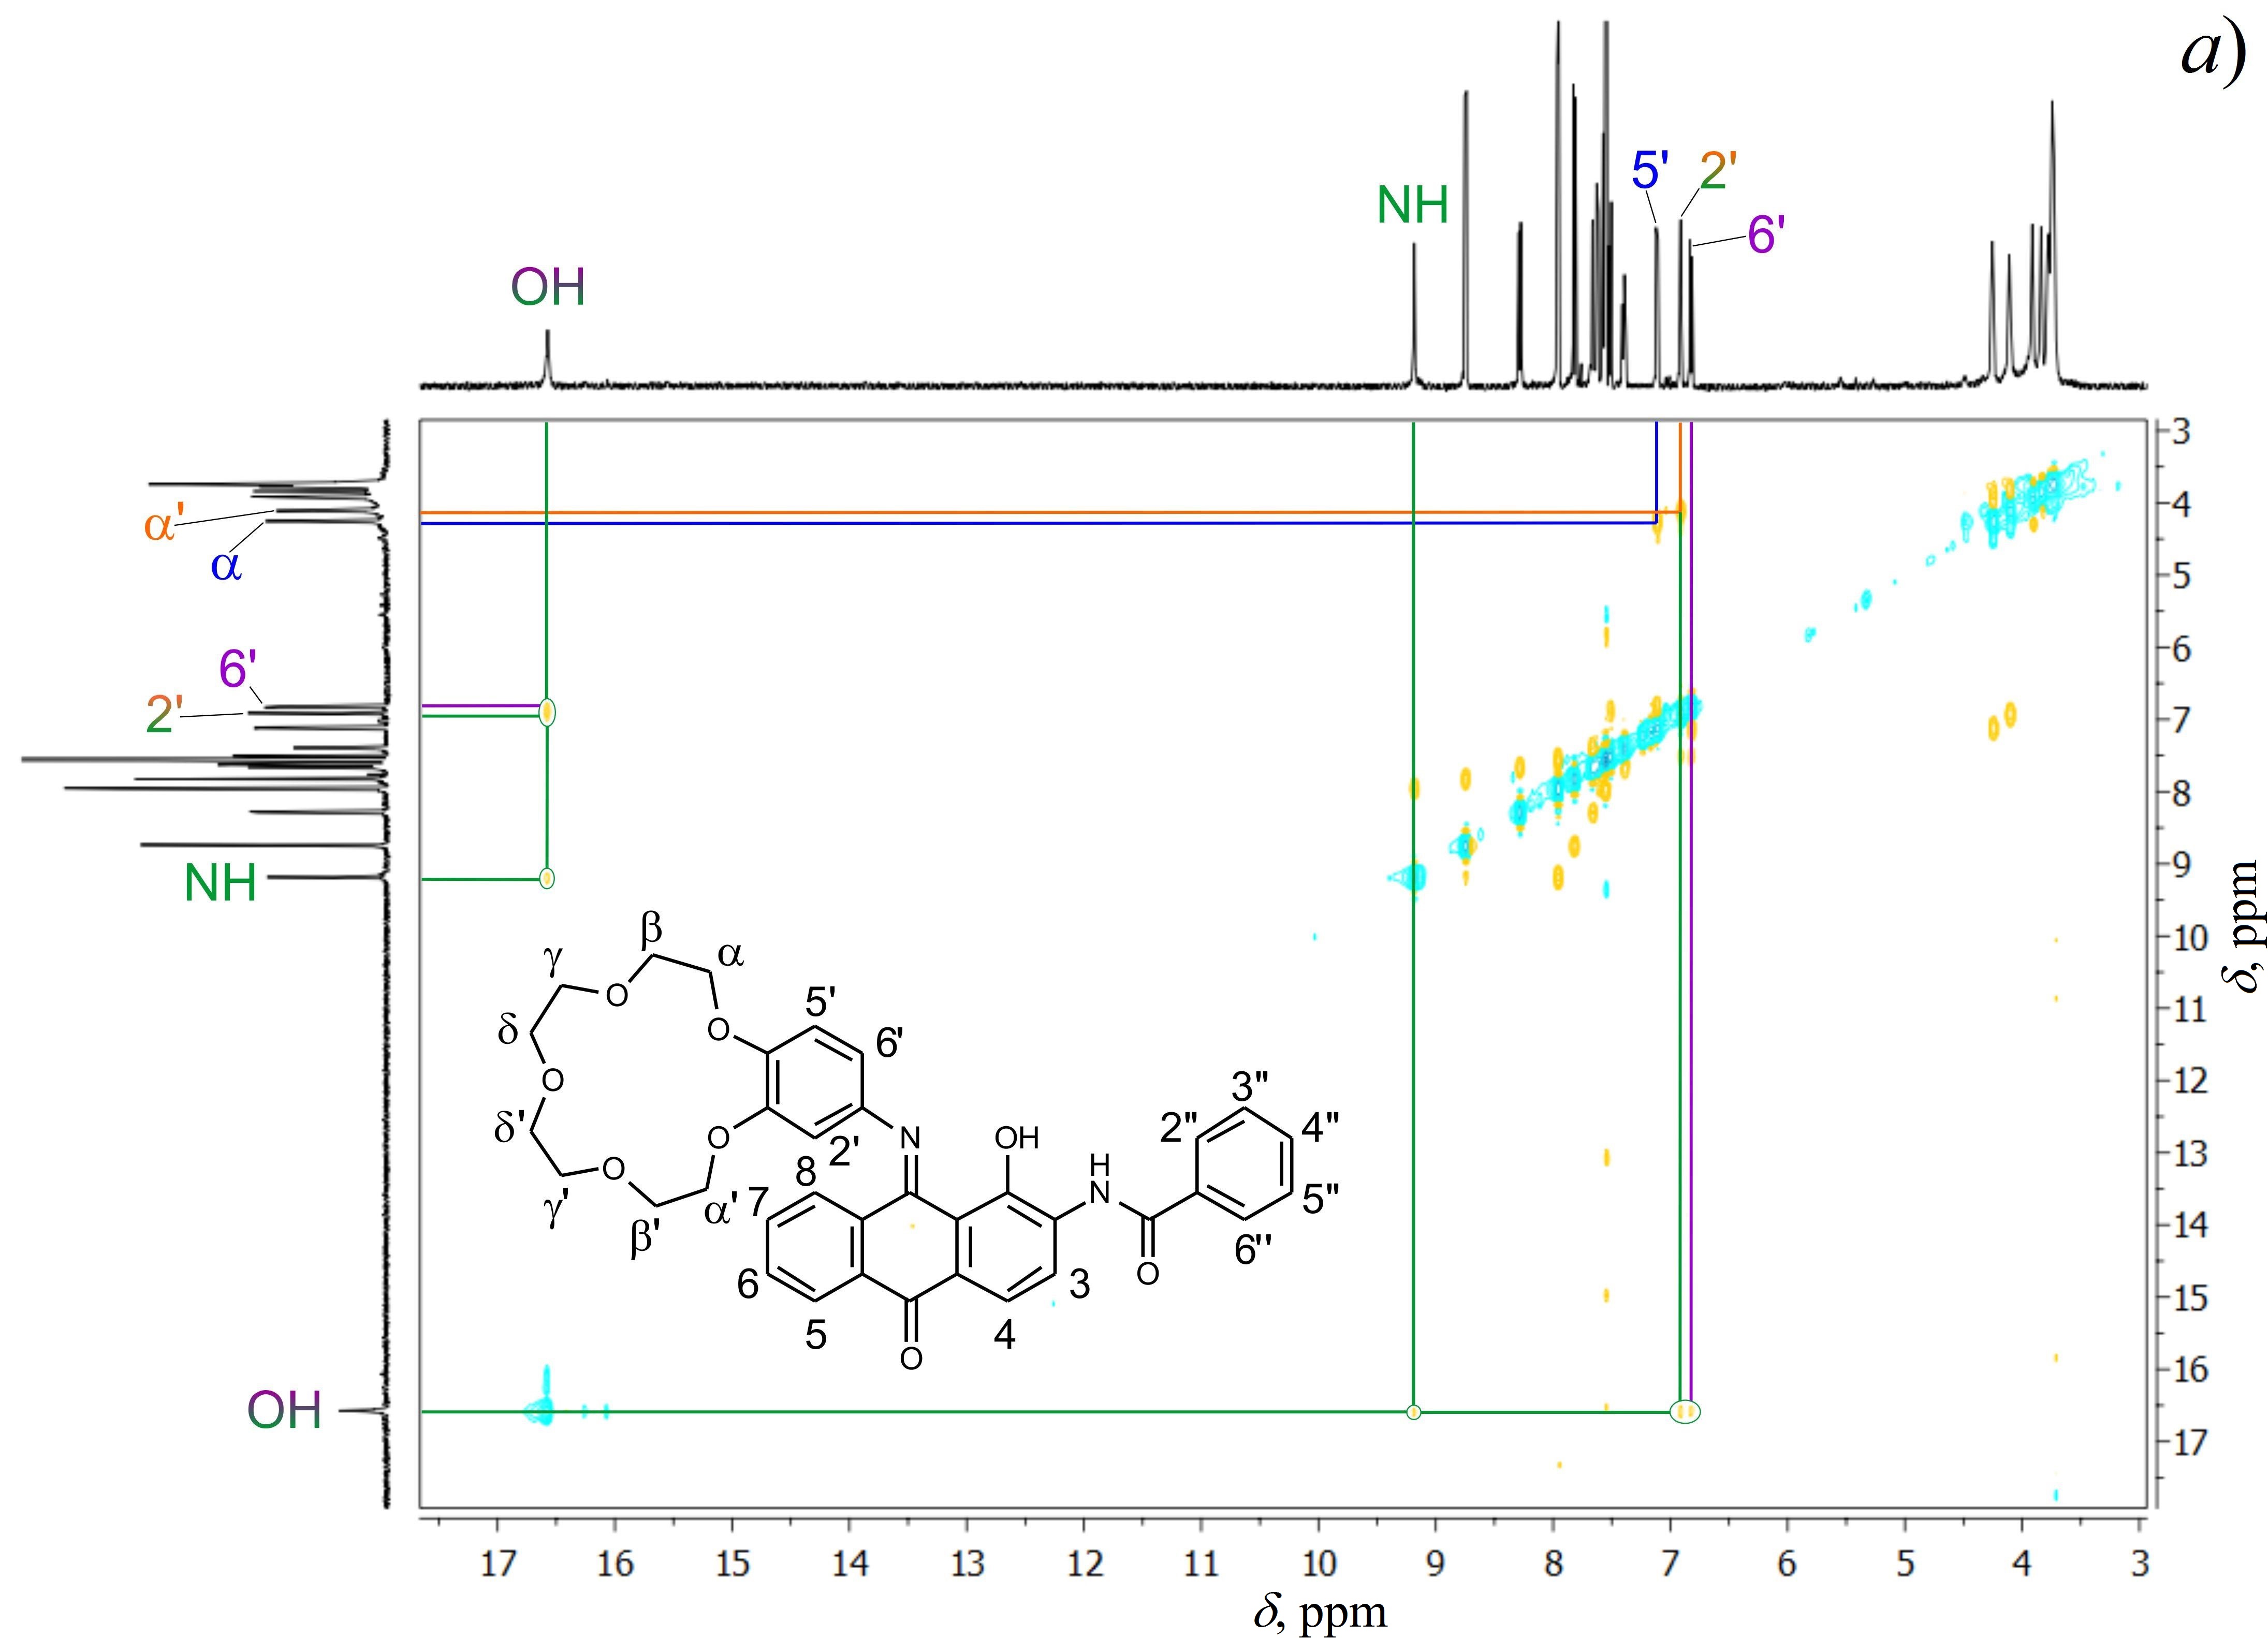


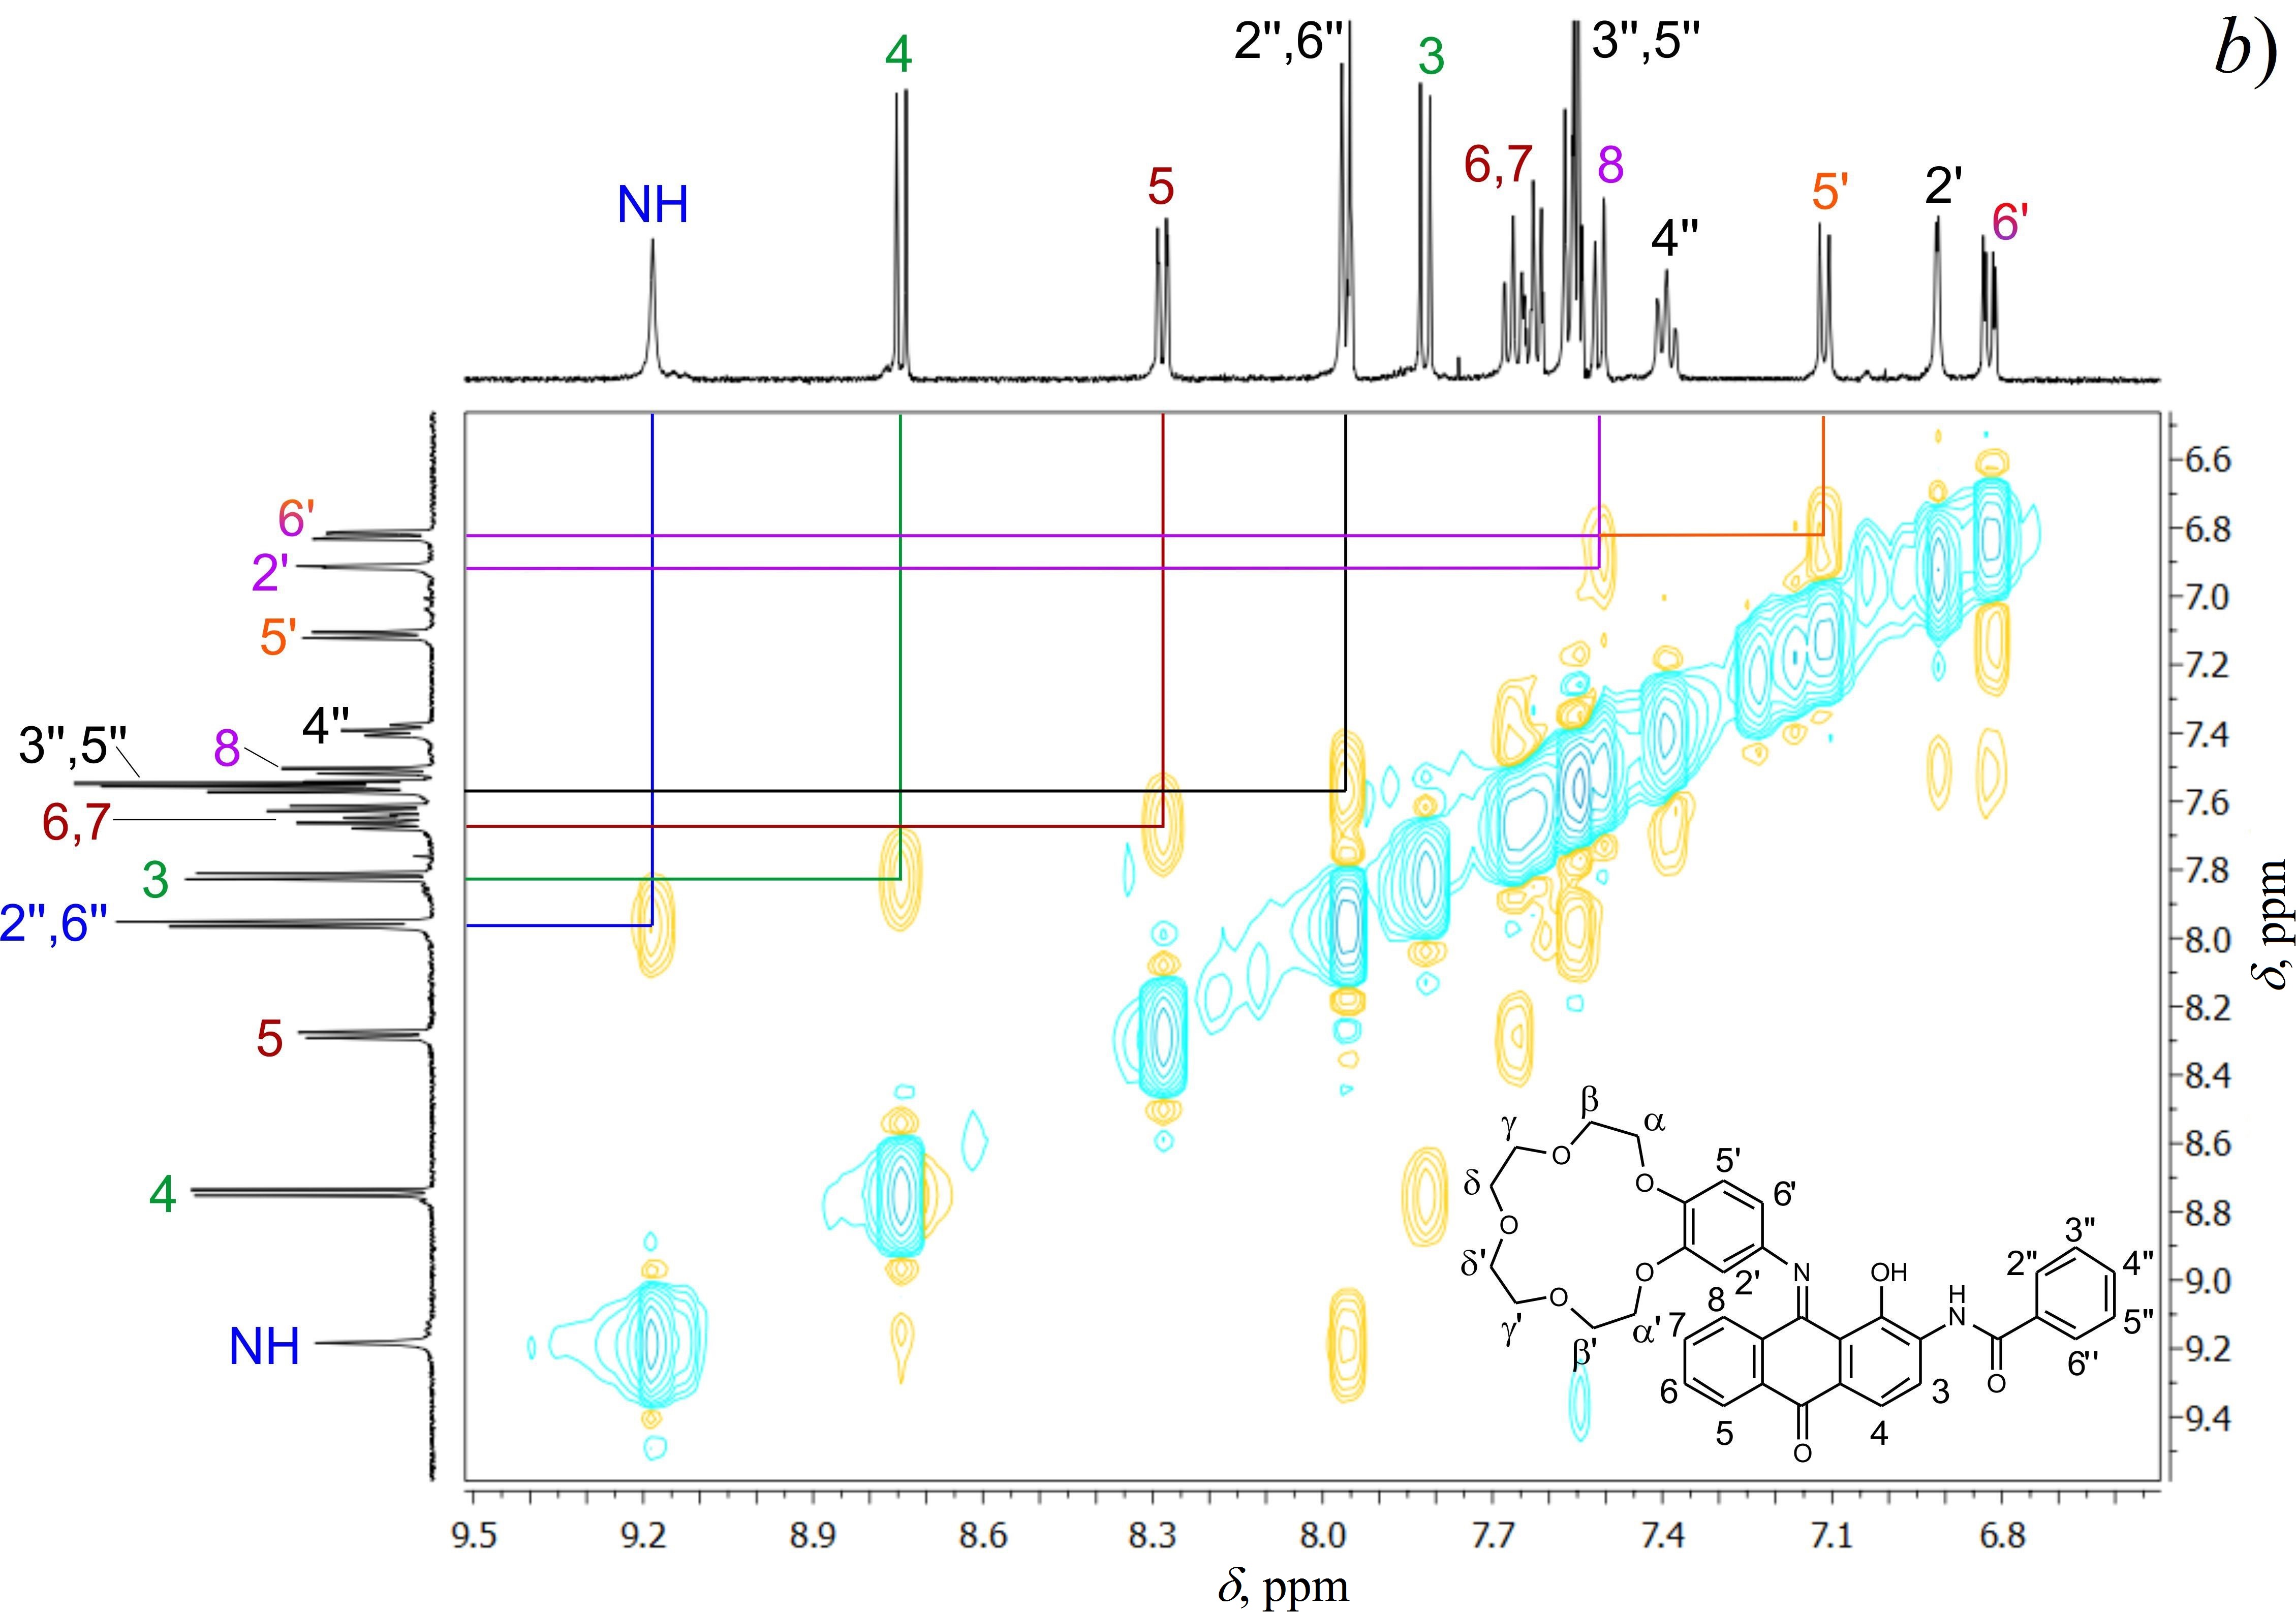


**Figure S13.** NOESY 1H-1H NMR spectrum of dye **1** in a 4:1 mixture of MeCN-*d*3 and CDCl3: *a*) full spectrum; *b*) scaled up part.


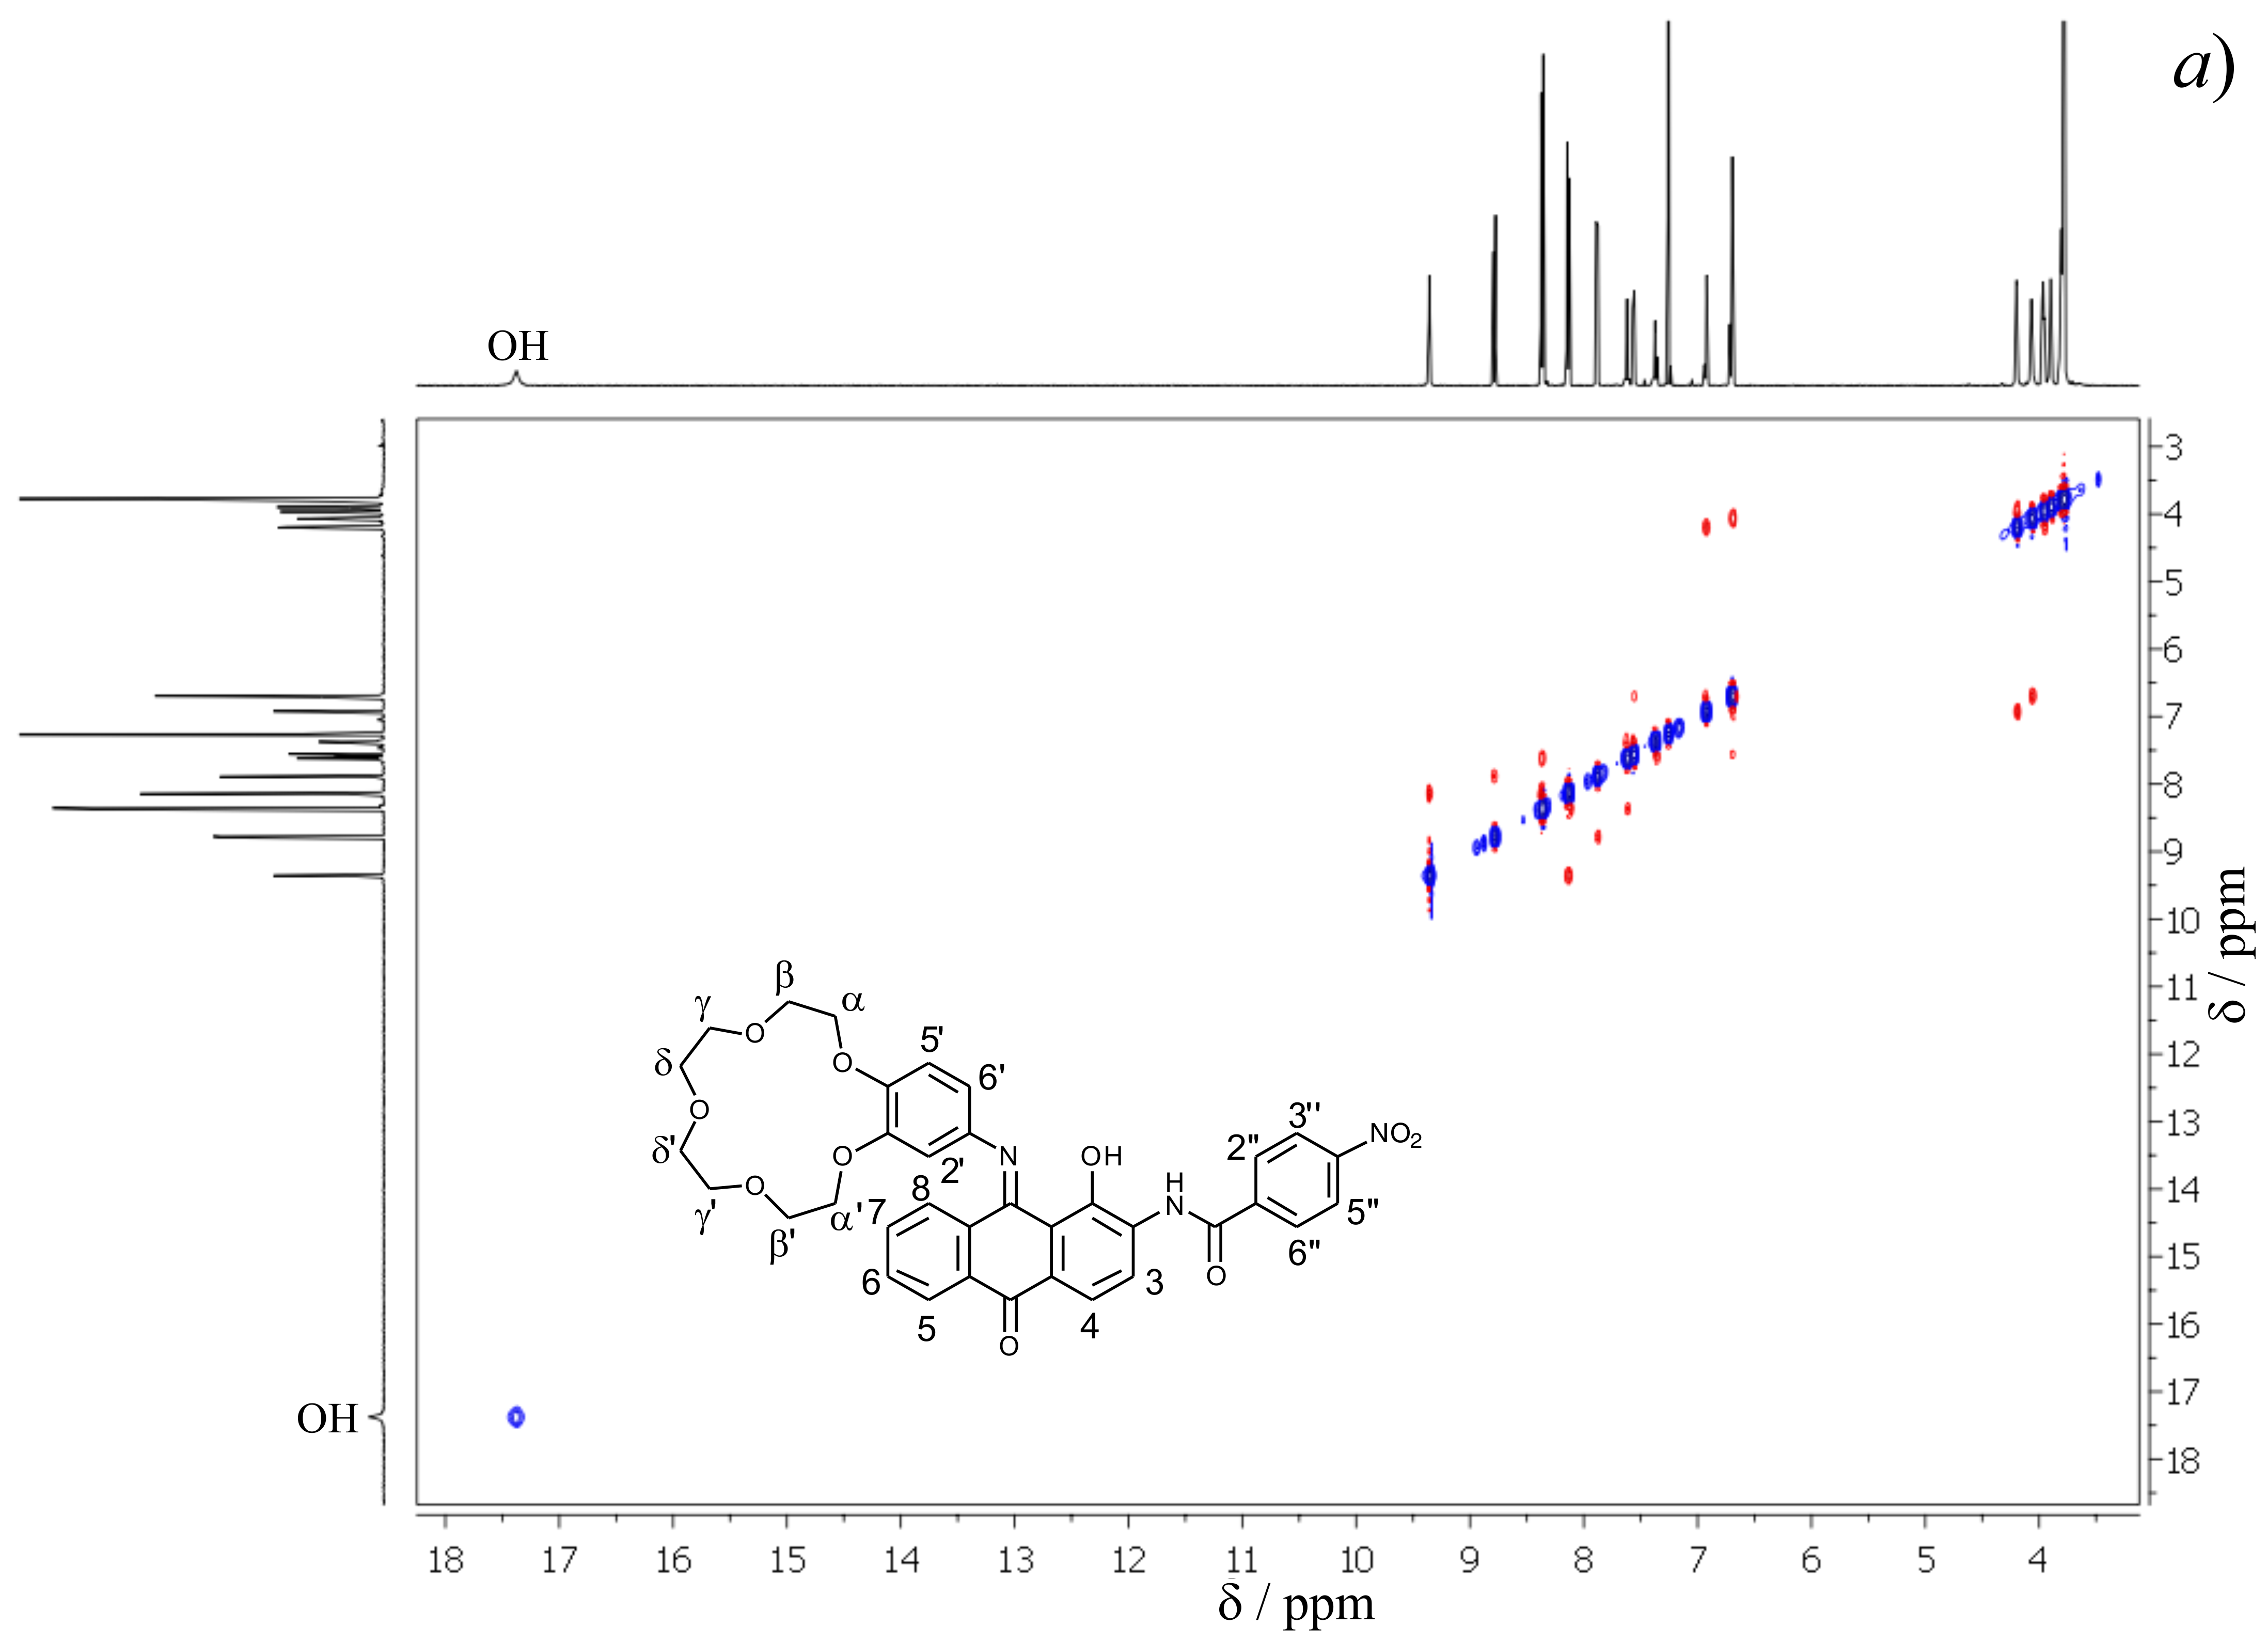


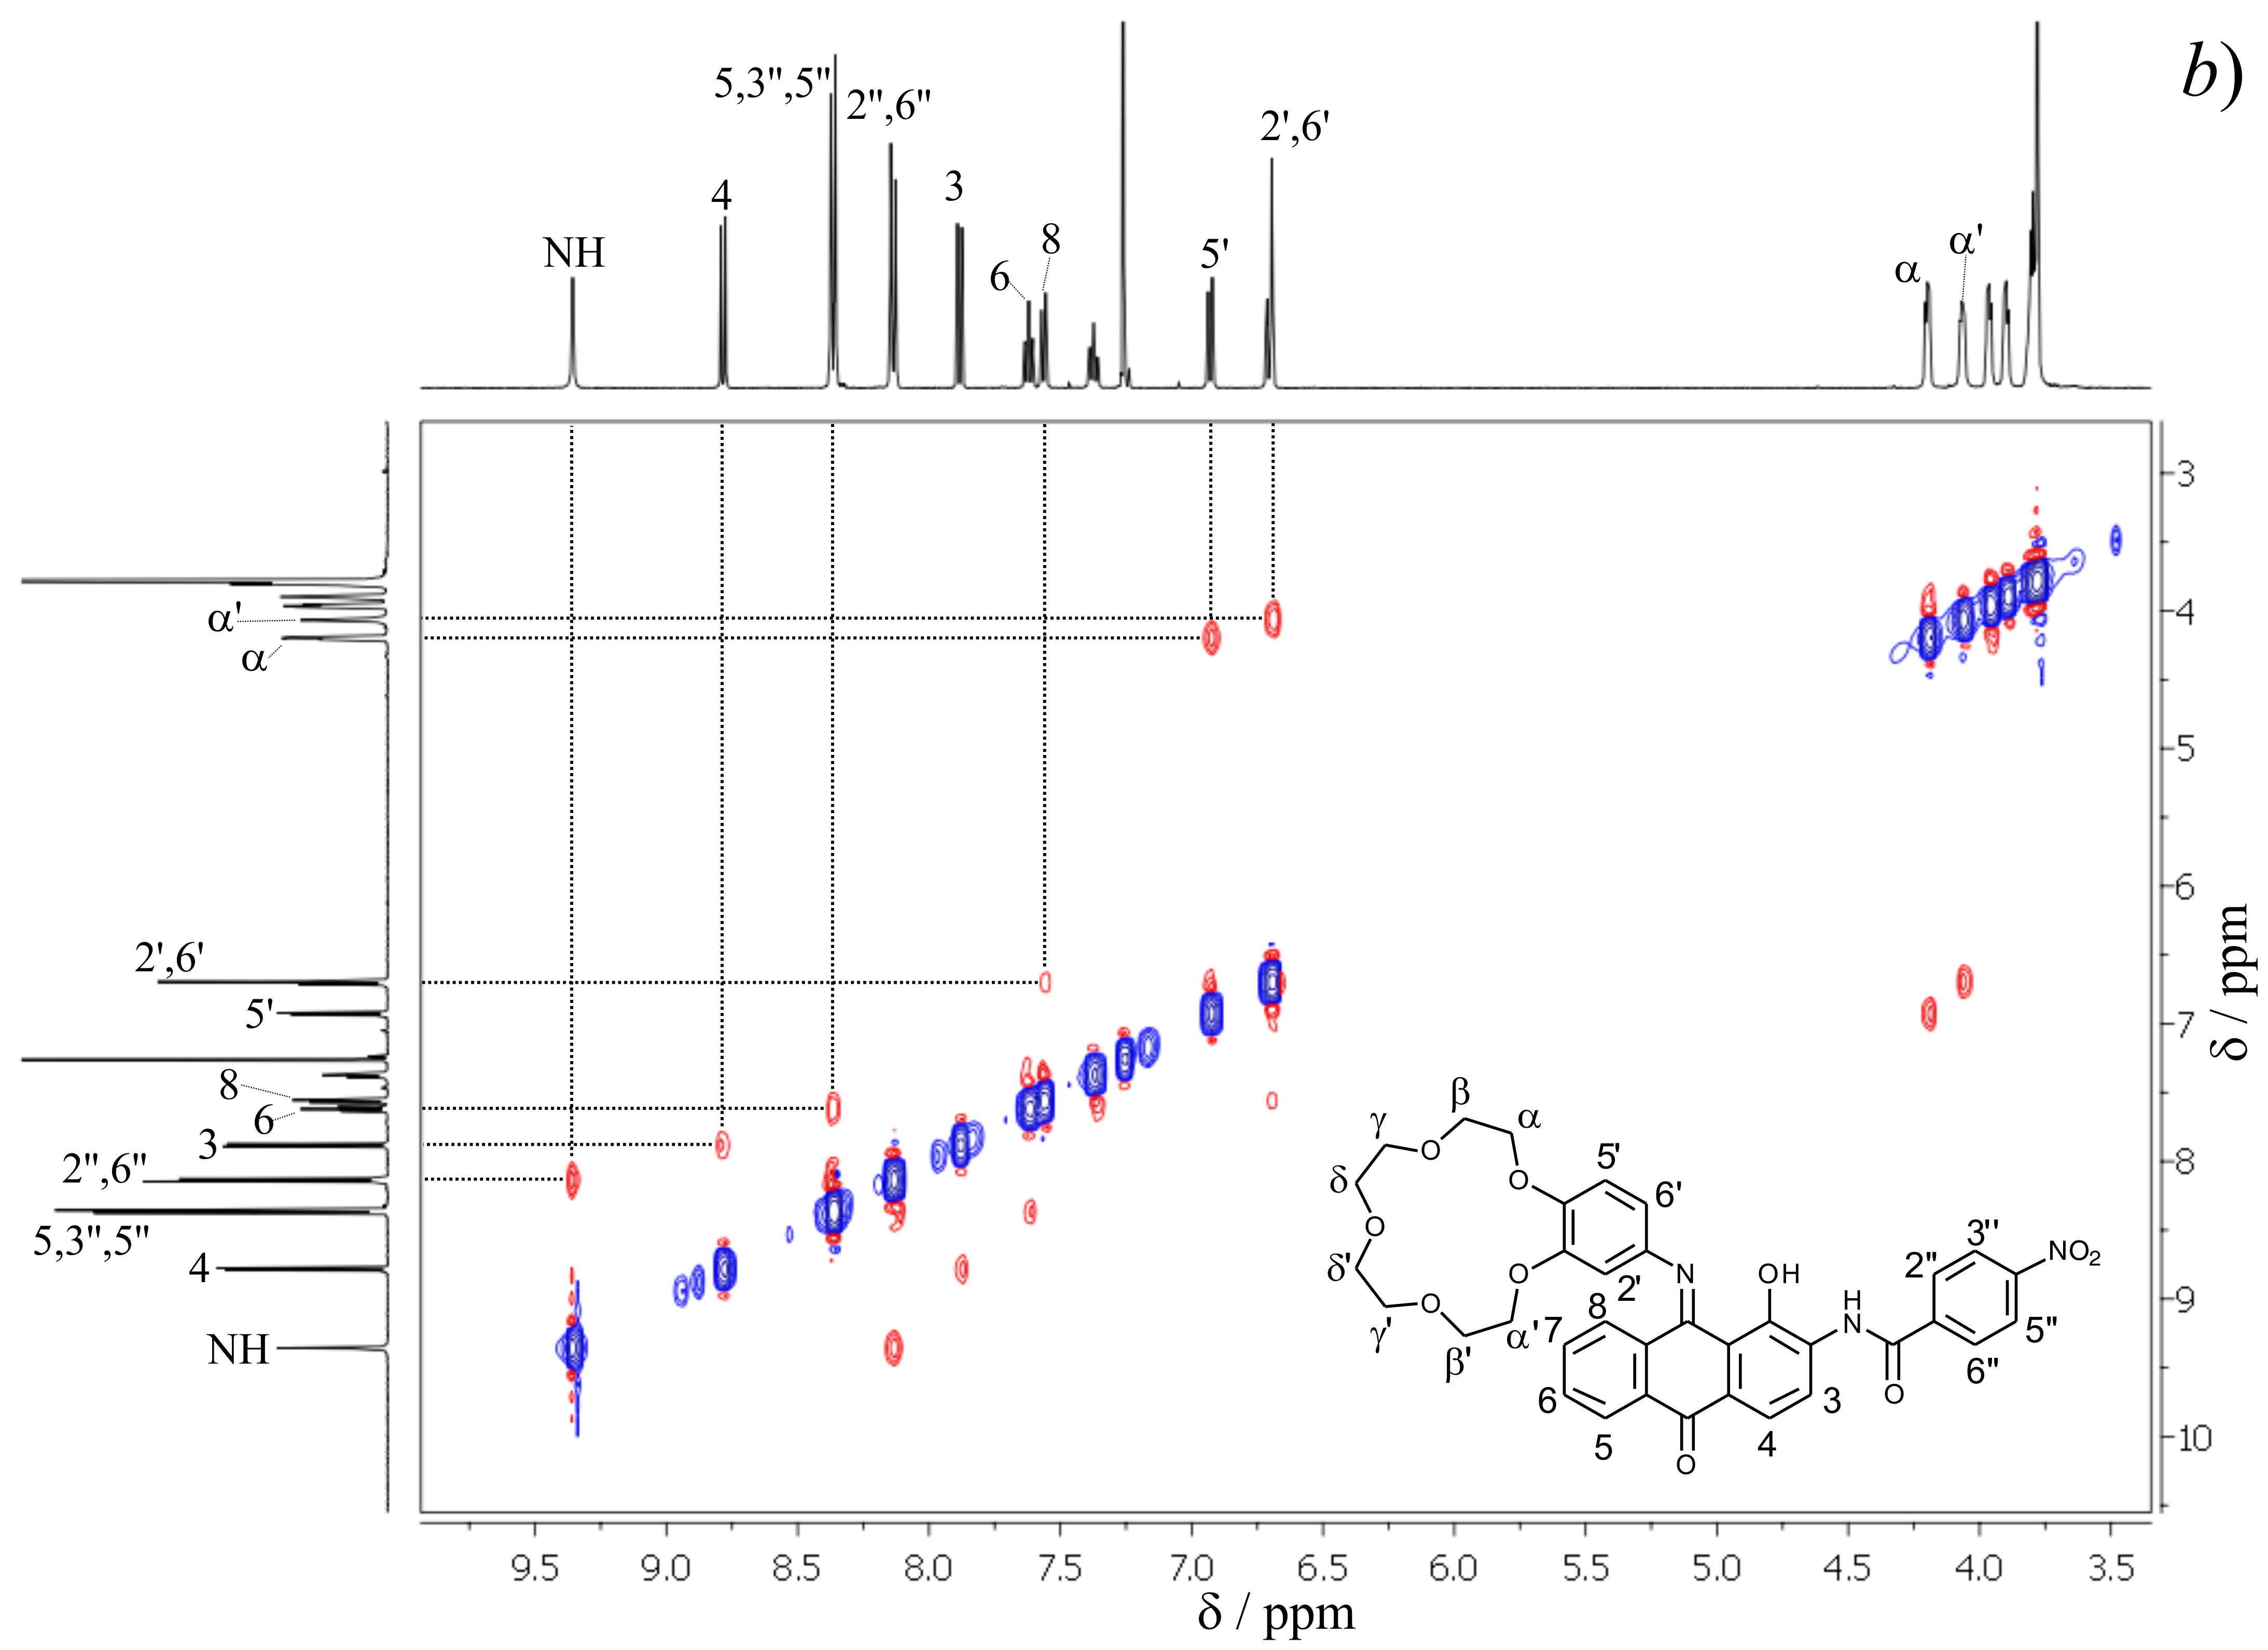


**Figure S14.** NOESY 1H-1H NMR spectrum of dye **3** in CDCl3: *a*) full spectrum; *b*) scaled up part.


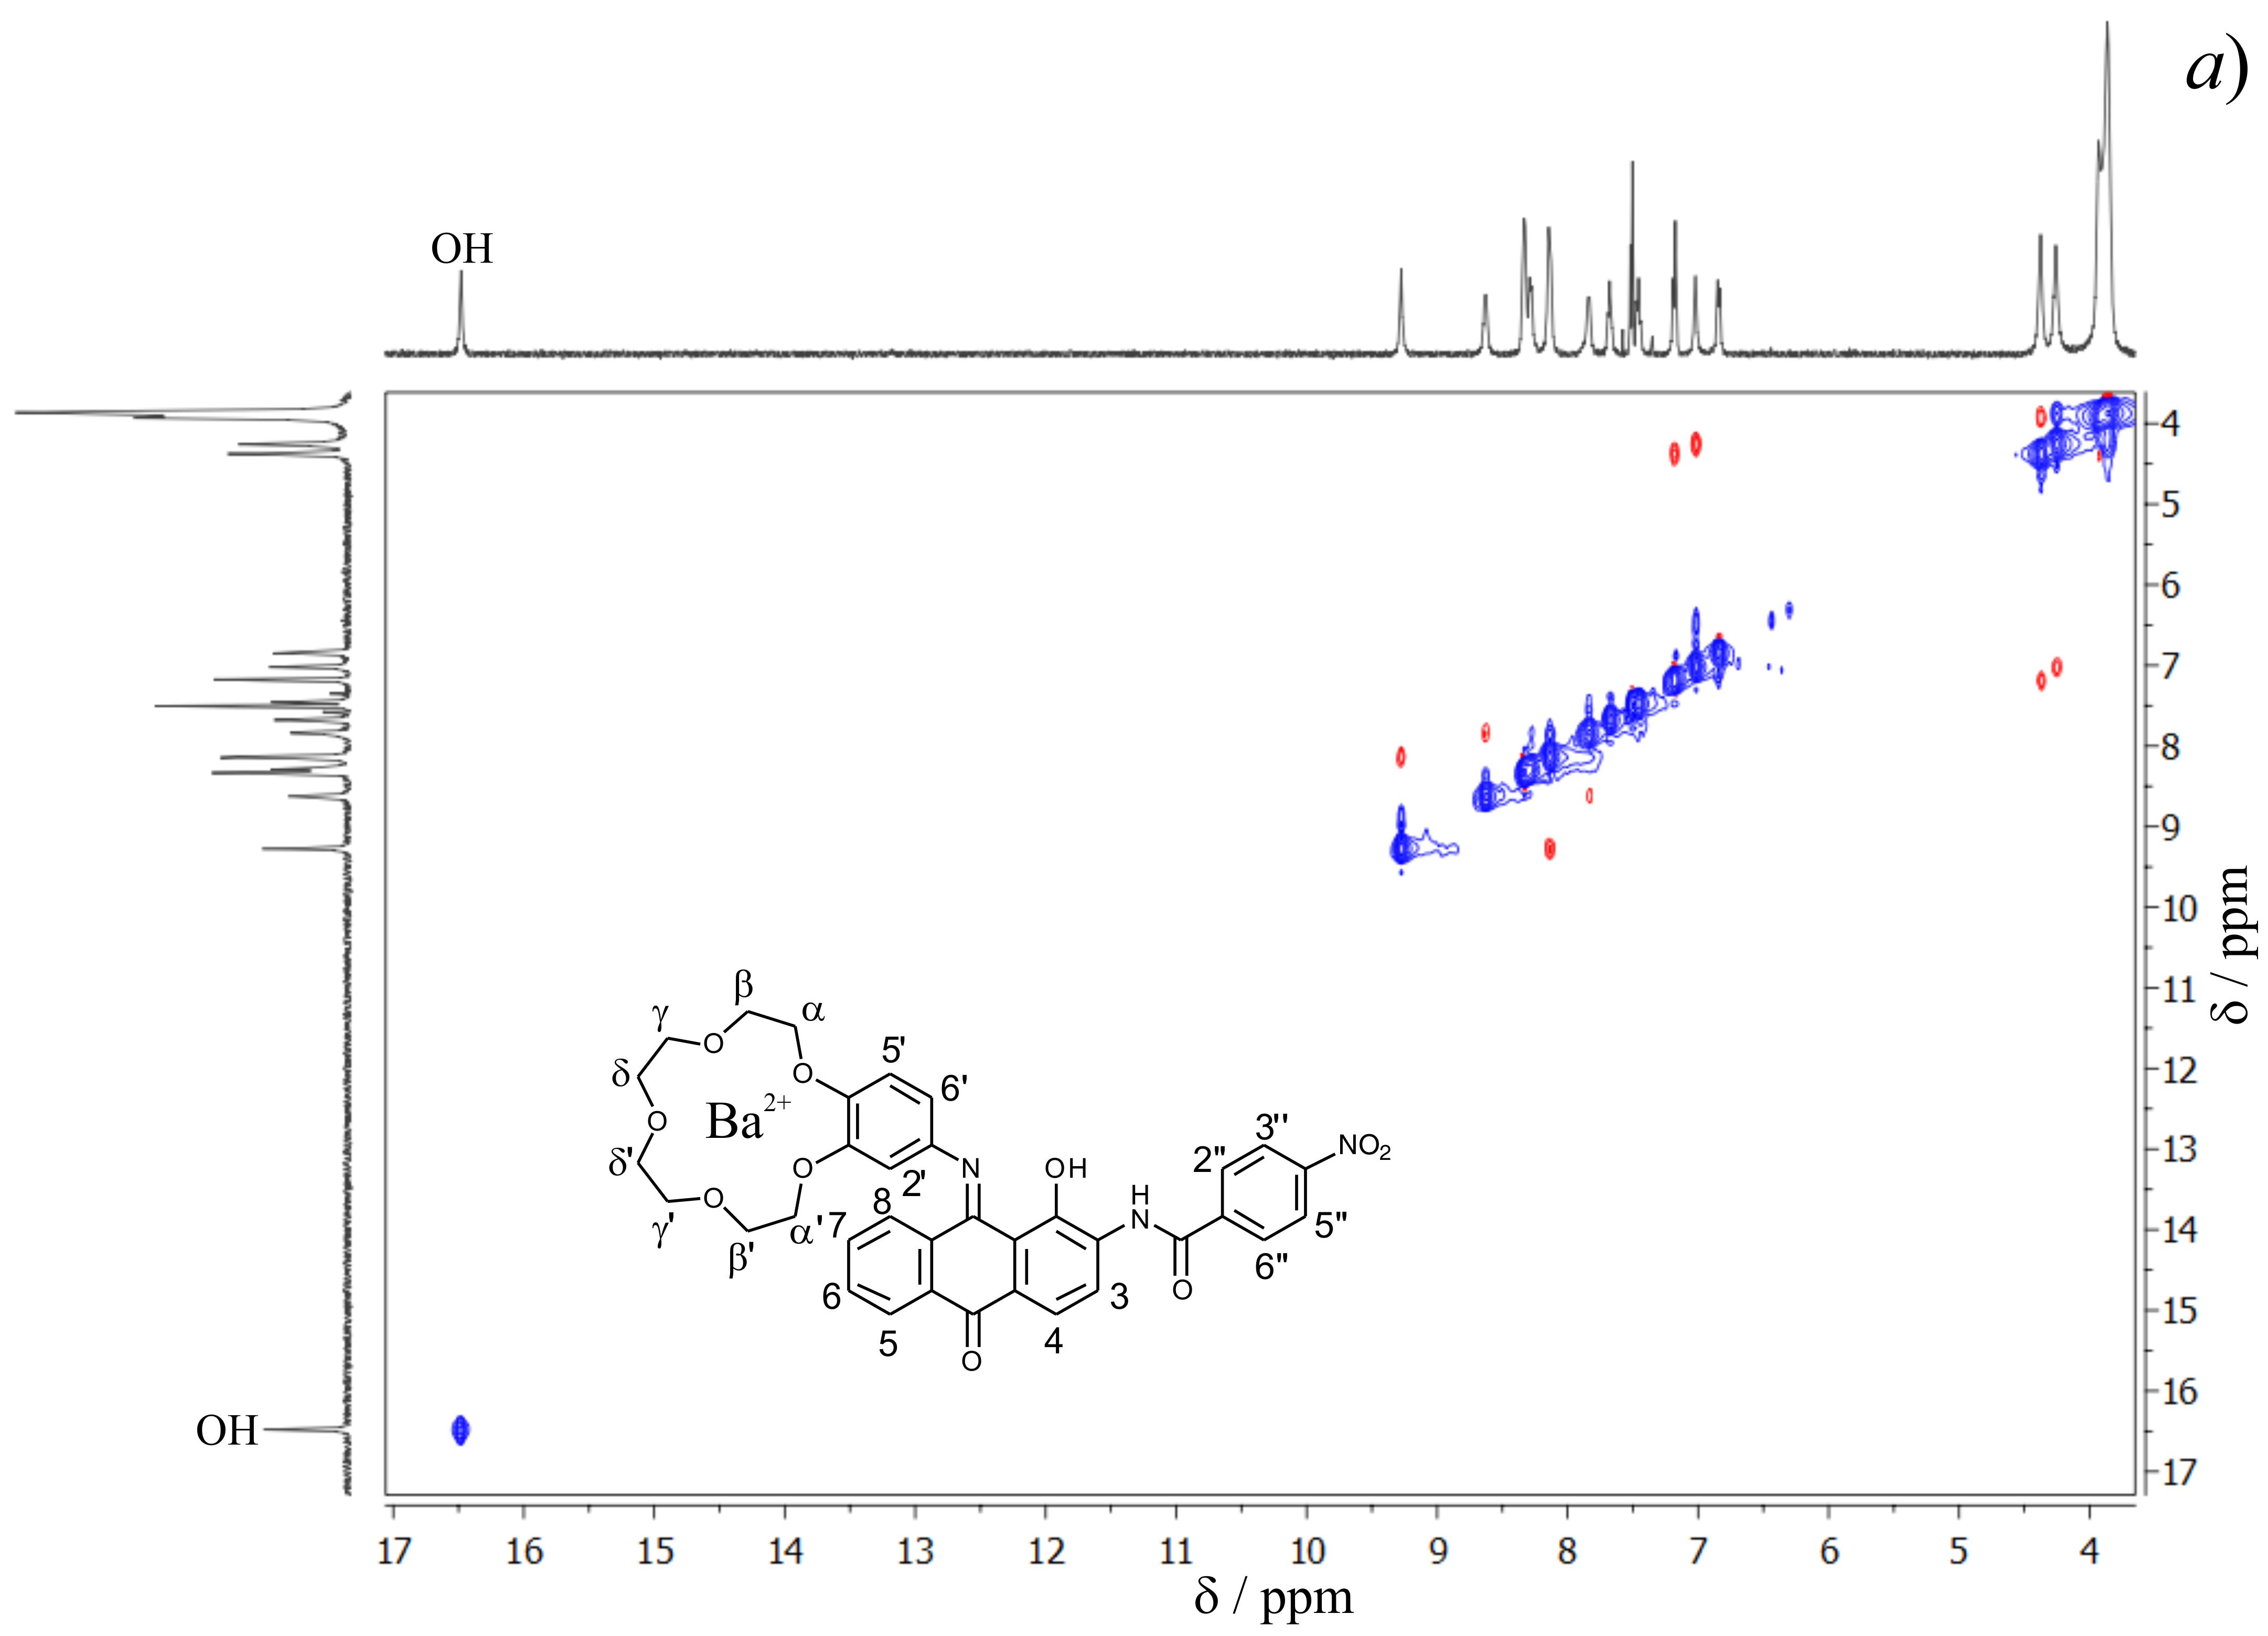


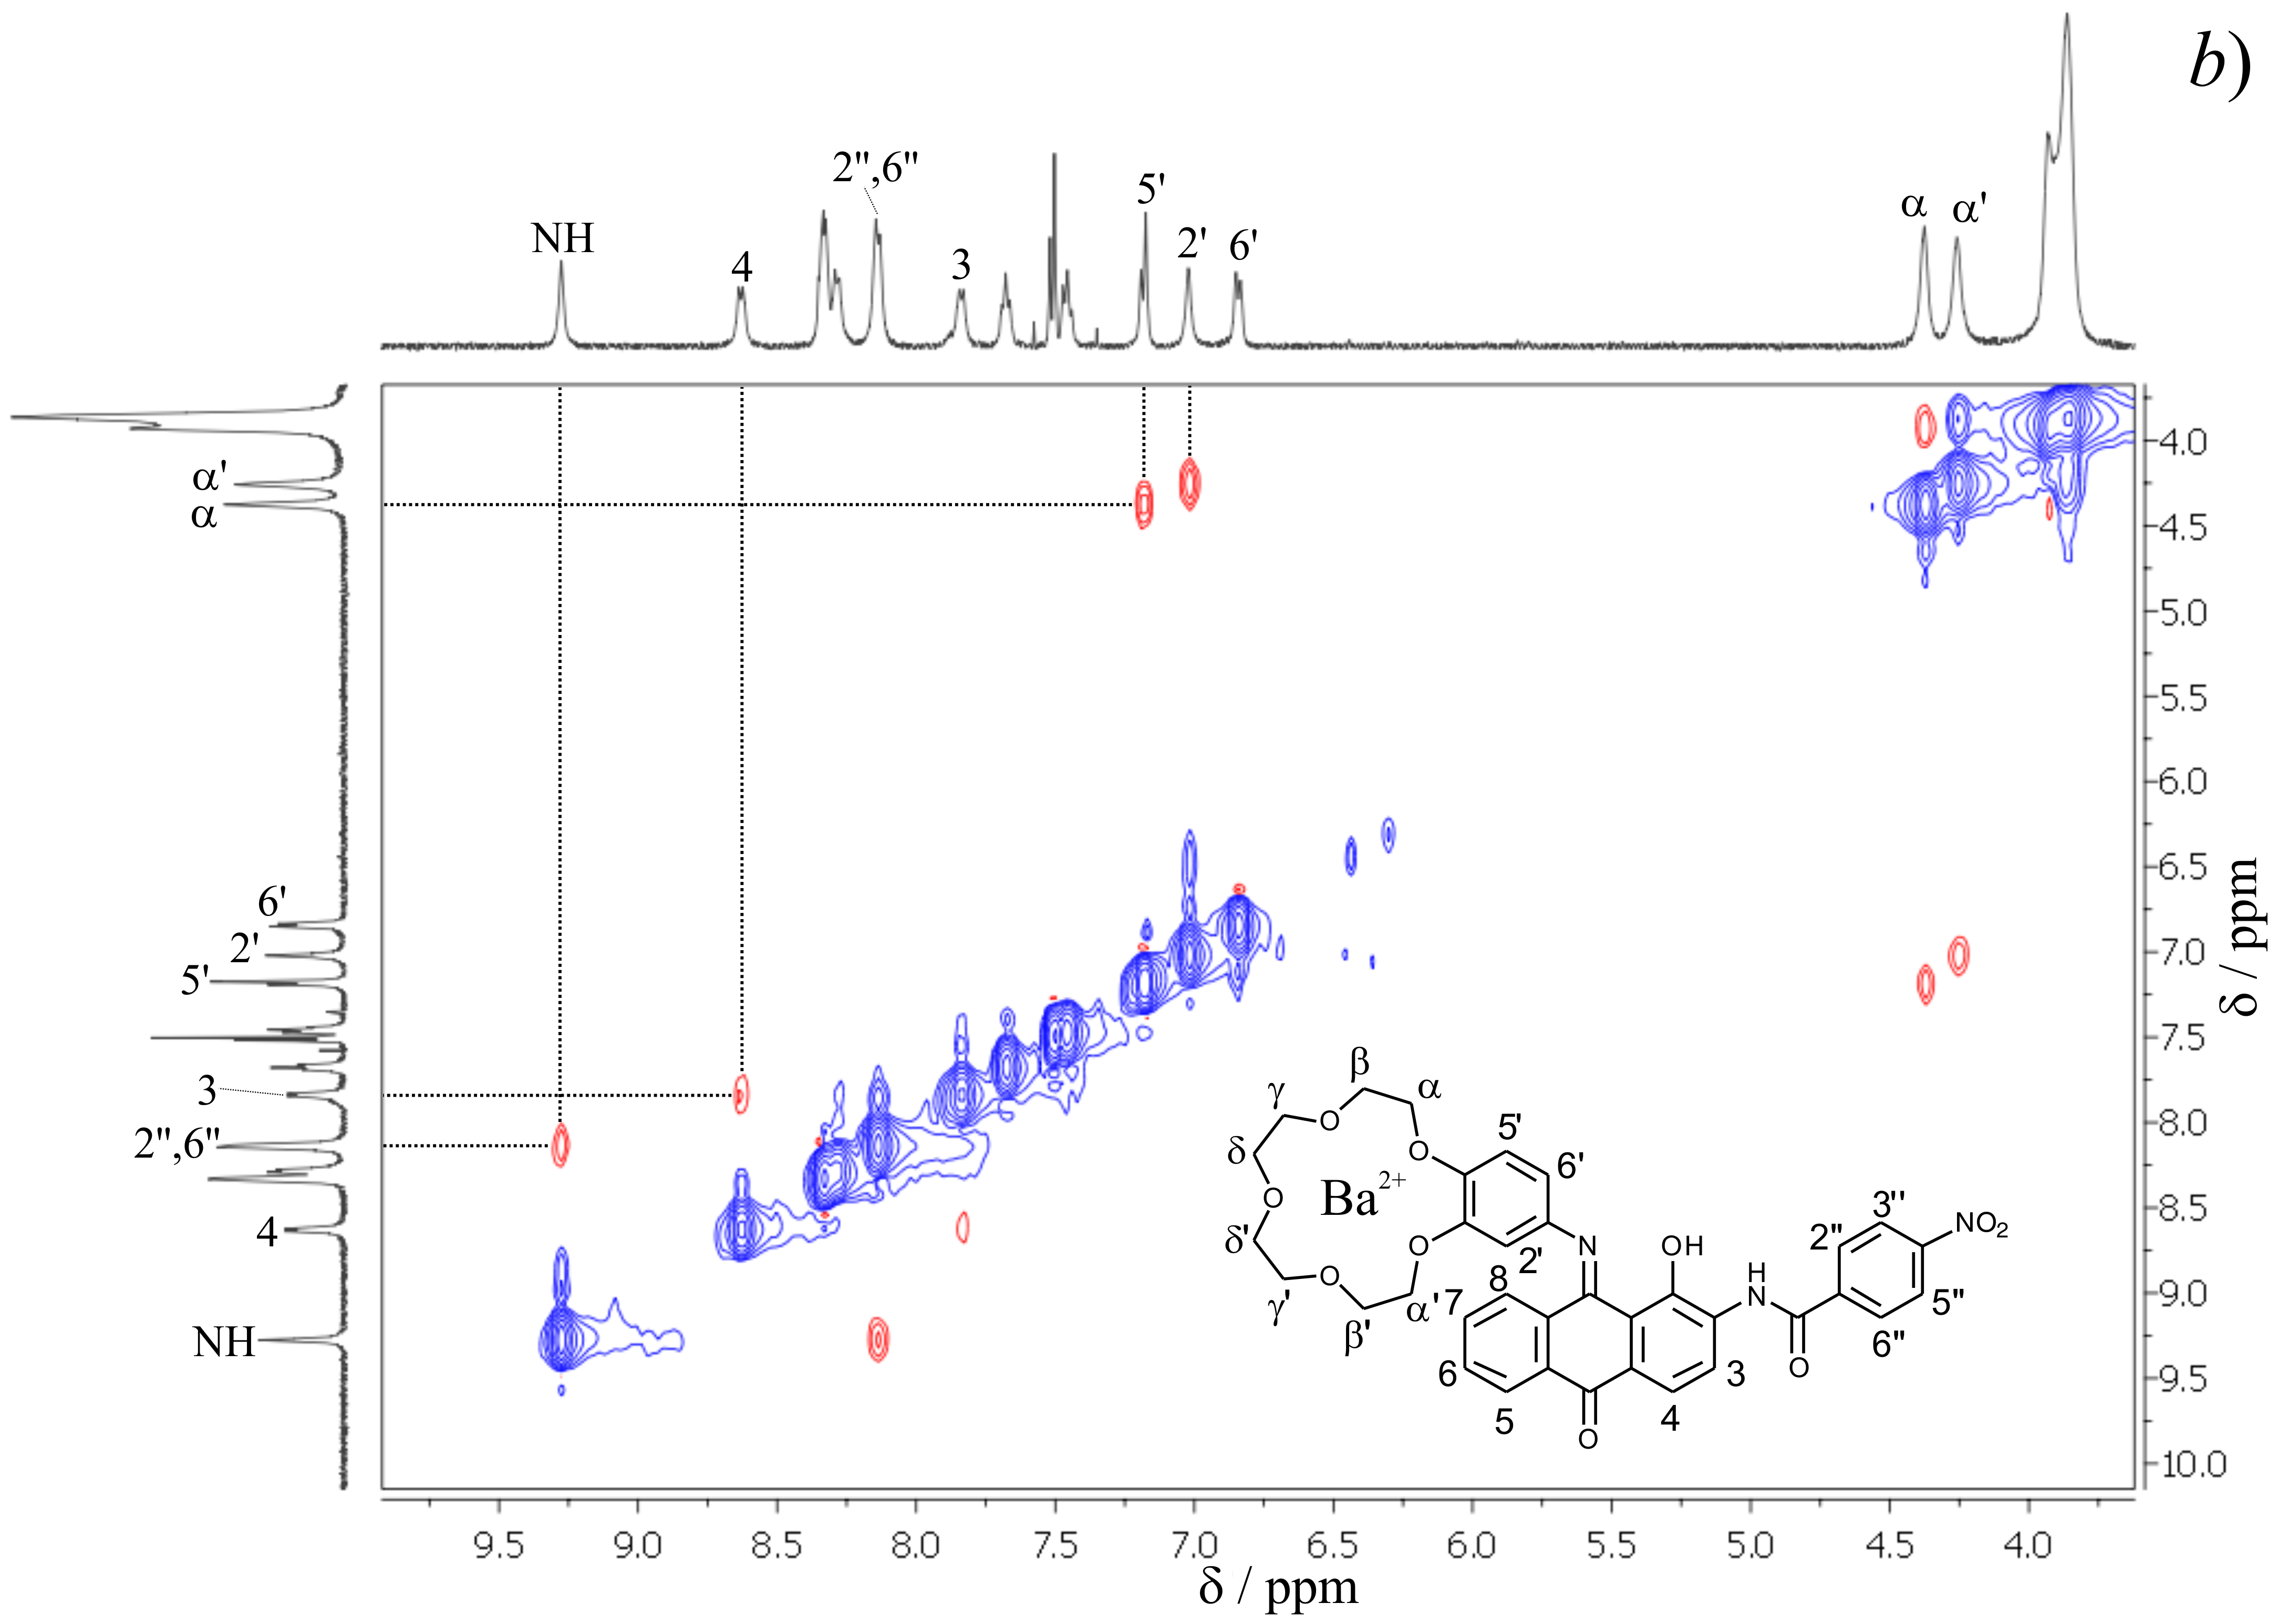


**Figure S15.** NOESY 1H-1H NMR spectrum of the system dye **3** (2103 M)–Ba(ClO4)2 (0.2 M) in MeCN-*d*3: *a*) full spectrum; *b*) scaled up part.


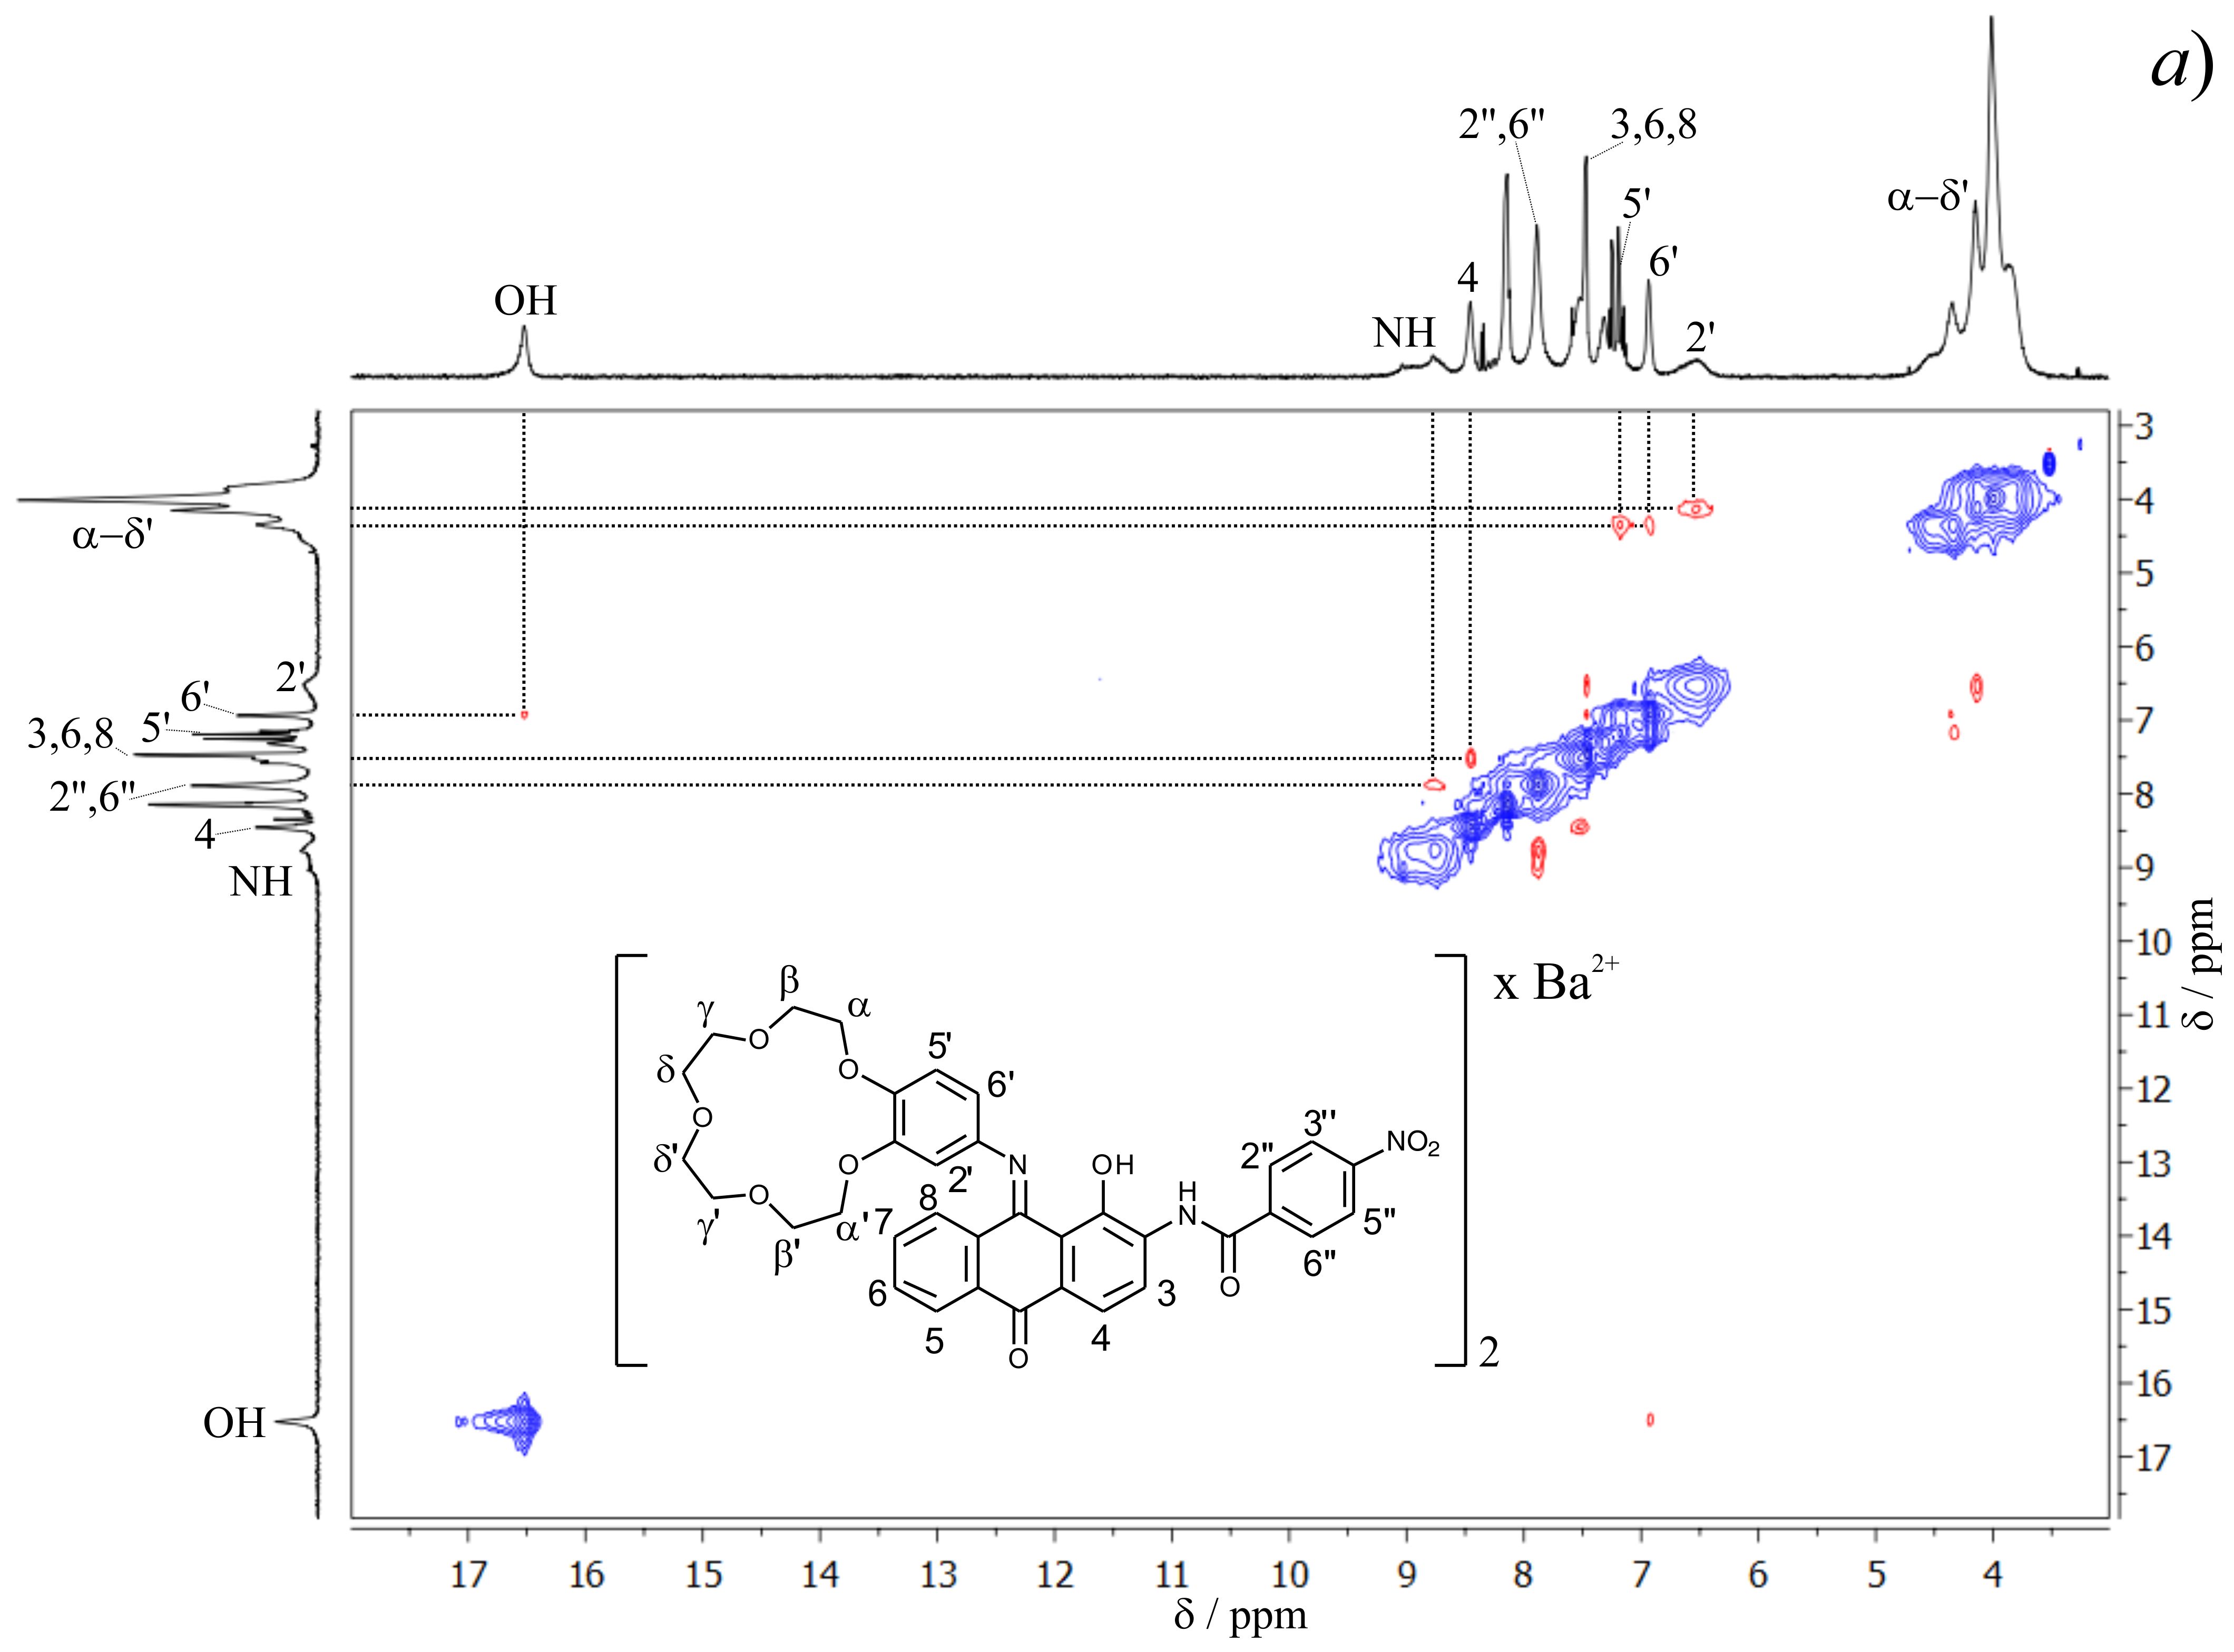


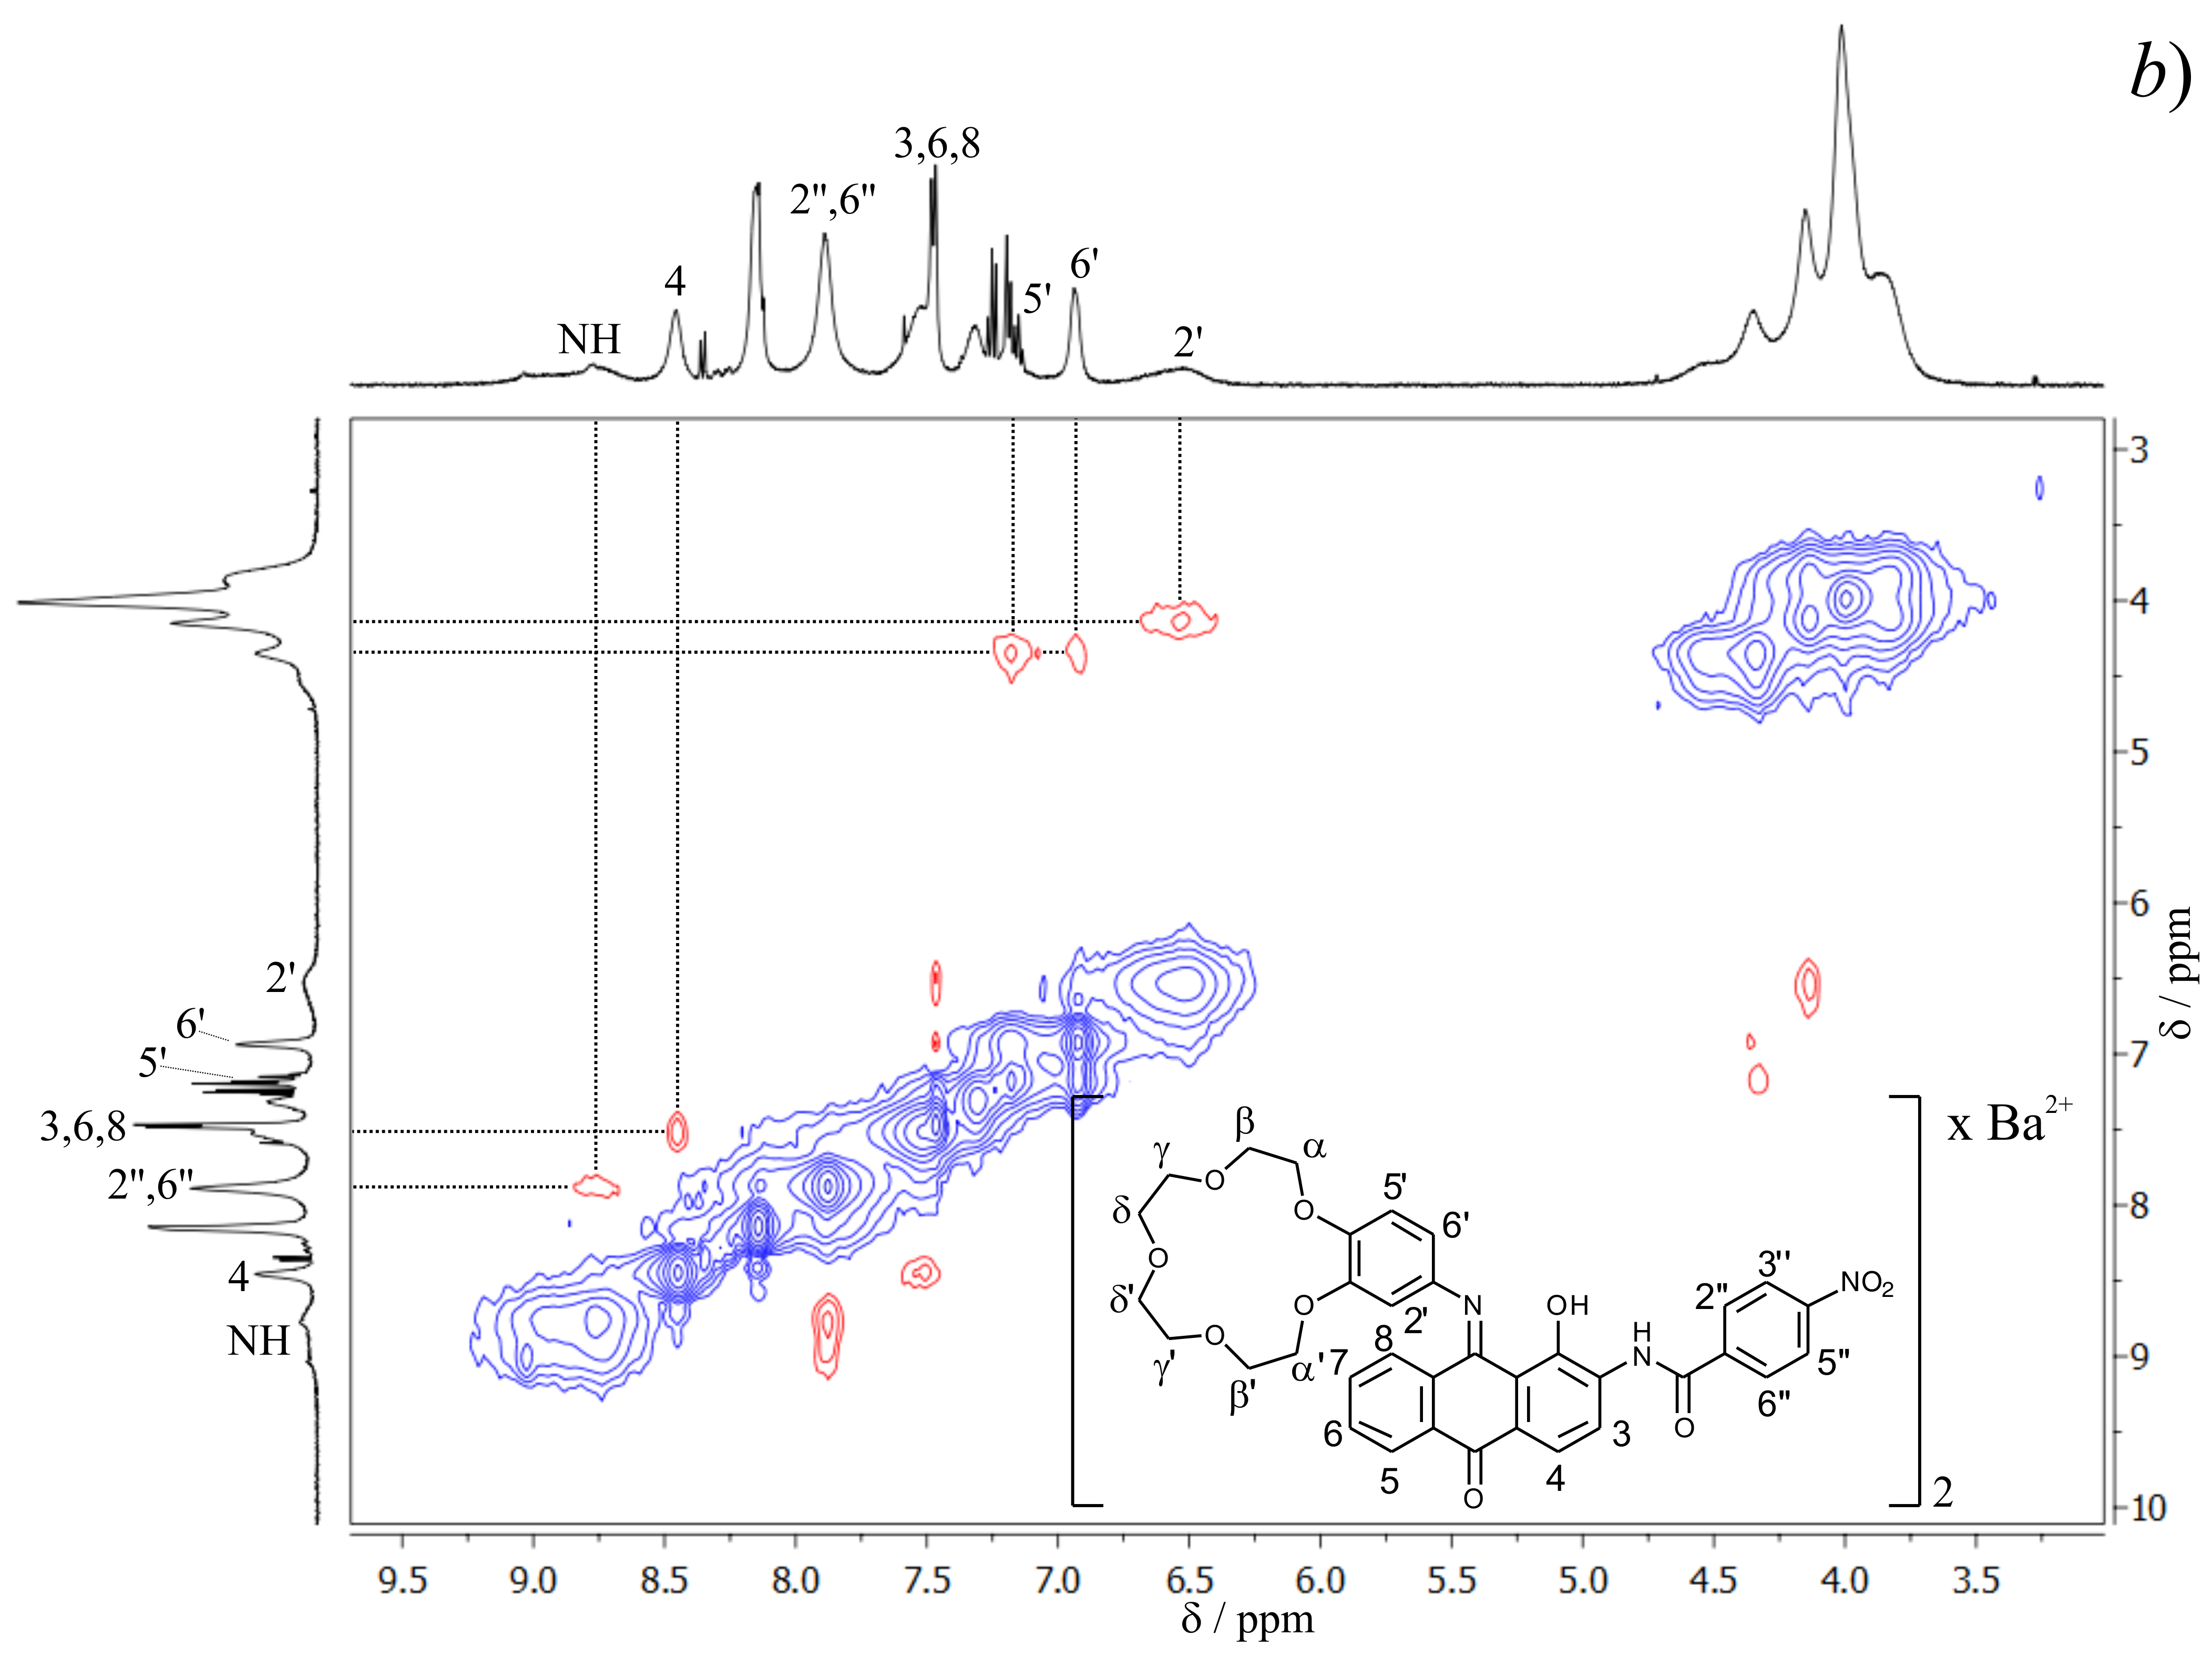


**Figure S16.** NOESY 1H-1H NMR spectrum of the system dye **3** (2103 M)–Ba(ClO4)2 (2103 M) in MeCN-*d*3: *a*) full spectrum; *b*) aromatic region.

# **VII** **Table S3:** Cartesian coordinates from DFT calculations in solution

| 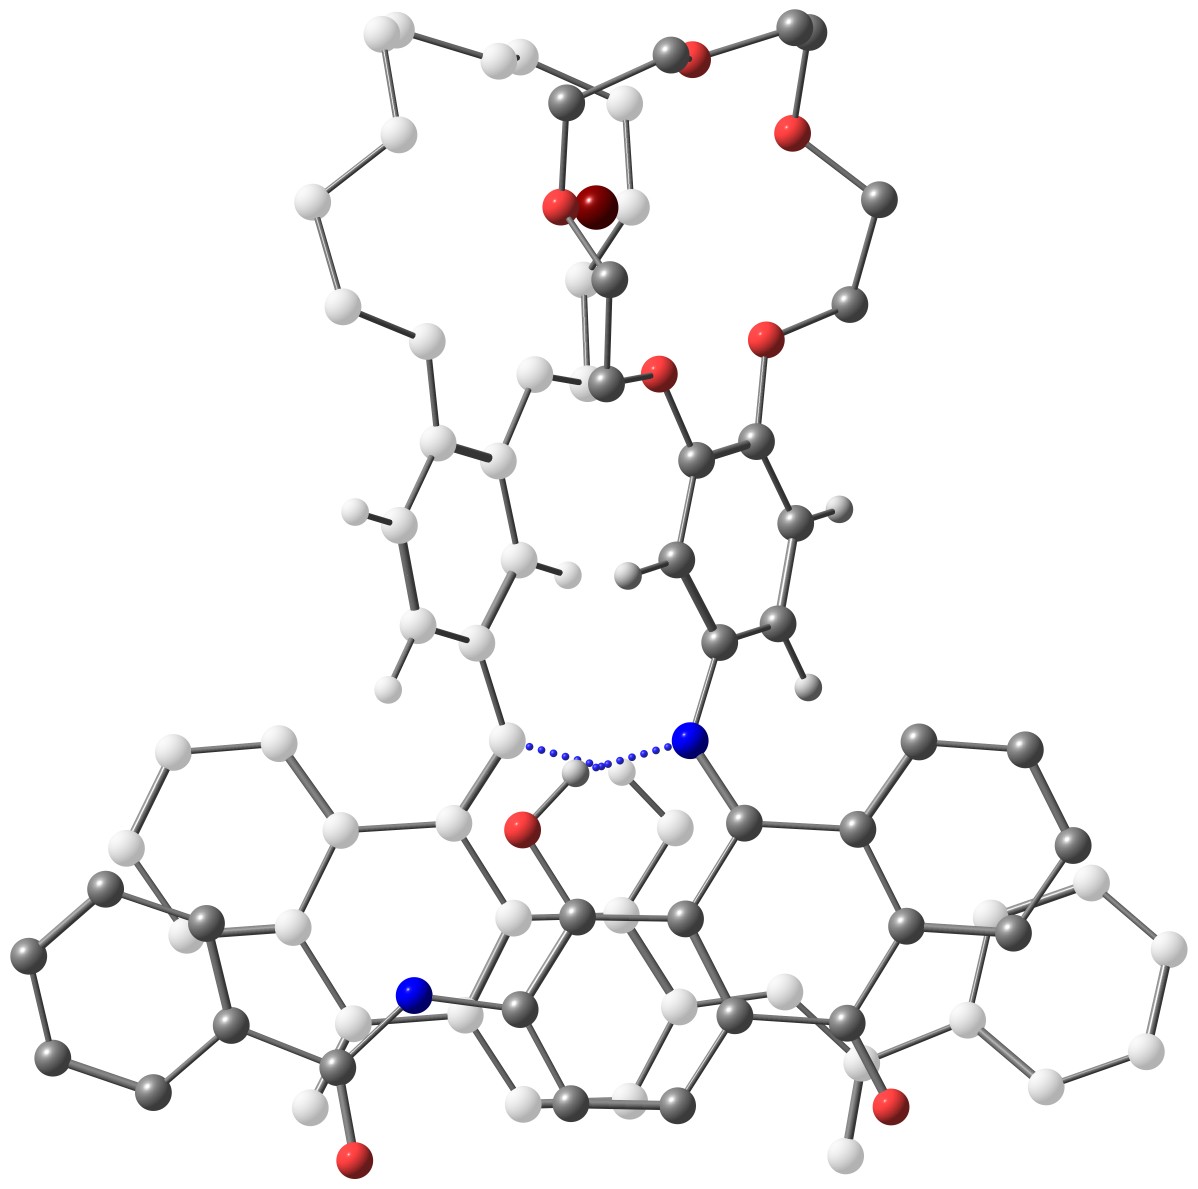 | *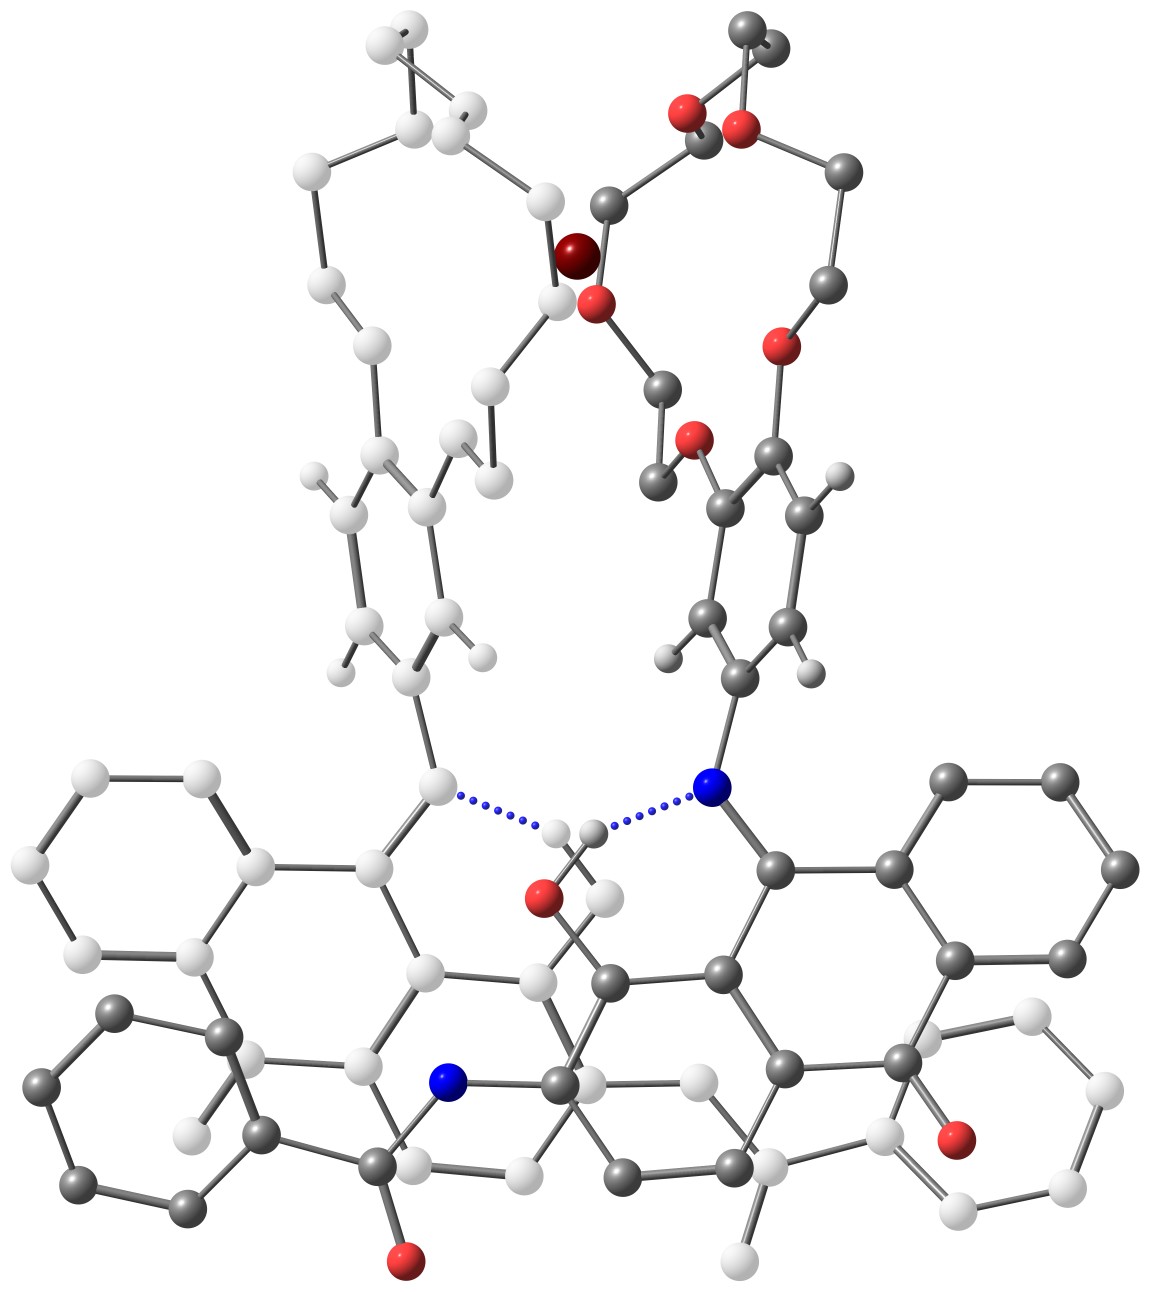* |
| --- | --- |
| *in*-[*anti-*(*s-trans-***1**)2]**·**Ba2+ | *out*-[*anti-*(*s-trans-***1**)2]**·**Ba2+ |
| DFT/CPCM energy = –4154.43303175 a.u. | DFT/CPCM energy = –4154.43132694 a.u. |
| Cartesian coordinates (Å):  C 2.511779000 5.289802000 -1.715257000  C 2.507660000 5.913861000 -2.966241000  C 2.283733000 5.152800000 -4.106704000  C 2.023062000 3.781442000 -4.010632000  C 1.957328000 3.154860000 -2.744142000  C 2.244365000 3.927855000 -1.606268000  C 1.896084000 3.010293000 -5.272682000  C 1.813377000 1.544749000 -5.167669000  C 1.727565000 0.912260000 -3.901679000  C 1.671298000 1.700595000 -2.656895000  C 1.783852000 0.789528000 -6.338303000  C 1.659534000 -0.597634000 -6.304130000  C 1.554334000 -1.245950000 -5.073858000  C 1.603919000 -0.492319000 -3.871000000  O 1.900310000 3.582180000 -6.368512000  N 1.395054000 1.026643000 -1.578576000  O 1.506867000 -1.196607000 -2.731567000  H 2.726591000 5.863319000 -0.818769000  H 2.696673000 6.979358000 -3.049776000  H 2.309052000 5.602073000 -5.091418000  H 2.272685000 3.469234000 -0.628662000  H 1.837747000 1.307764000 -7.288336000  H 1.616915000 -1.176494000 -7.214446000  H 1.424353000 -0.485640000 -1.996693000  C -2.511803000 -5.289797000 -1.715234000  C -2.507713000 -5.913865000 -2.966214000  C -2.283792000 -5.152816000 -4.106687000  C -2.023105000 -3.781460000 -4.010630000  C -1.957339000 -3.154872000 -2.744143000  C -2.244364000 -3.927854000 -1.606259000  C -1.896155000 -3.010315000 -5.272687000  C -1.813427000 -1.544771000 -5.167681000  C -1.727561000 -0.912284000 -3.901695000  C -1.671273000 -1.700615000 -2.656909000  C -1.783939000 -0.789543000 -6.338314000  C -1.659604000 0.597619000 -6.304138000  C -1.554333000 1.245928000 -5.073866000  C -1.603889000 0.492289000 -3.871013000  O -1.900392000 -3.582210000 -6.368514000  N -1.395021000 -1.026660000 -1.578595000  O -1.506810000 1.196553000 -2.731572000  H -2.726606000 -5.863305000 -0.818739000  H -2.696740000 -6.979360000 -3.049738000  H -2.309125000 -5.602097000 -5.091398000  H -2.272656000 -3.469225000 -0.628655000  H -1.837886000 -1.307773000 -7.288347000  H -1.617022000 1.176484000 -7.214451000  H -1.424321000 0.485545000 -1.996741000  O 2.730405000 -0.811427000 5.389941000  O 1.845430000 0.585012000 3.206605000  O -0.051382000 2.239019000 3.646334000  O -0.400624000 2.642225000 6.344683000  O 1.757677000 1.052436000 7.306246000  C 1.296629000 1.140662000 2.078794000  C 0.256801000 2.063565000 2.318710000  C -0.720594000 3.428743000 4.103283000  C -0.158394000 3.751194000 5.471522000  C 0.151393000 2.792117000 7.659946000  C 1.619455000 2.416904000 7.718078000  C 3.113879000 0.597210000 7.363434000  C 3.193280000 -0.787475000 6.746054000  C 3.664184000 -0.291890000 4.441090000  C 3.004886000 -0.257180000 3.083129000  C 1.666433000 0.826260000 0.781632000  C 1.036150000 1.467347000 -0.300650000  C -0.007508000 2.370975000 -0.064306000  C -0.399276000 2.660085000 1.246914000  H -1.796276000 3.235515000 4.143964000  H -0.518376000 4.261810000 3.424759000  H 0.917704000 3.943746000 5.389307000  H -0.428291000 2.121451000 8.300679000  H 0.015838000 3.821208000 8.012714000  H 1.978751000 2.535751000 8.748887000  H 2.226235000 3.055808000 7.063452000  H 3.448391000 0.545969000 8.408069000  H 3.756317000 1.310900000 6.833021000  H 2.543050000 -1.481411000 7.283031000  H 4.225002000 -1.155629000 6.801619000  H 4.552578000 -0.934994000 4.400098000  H 3.974047000 0.721771000 4.719547000  H 3.705339000 0.168267000 2.358748000  H 2.695114000 -1.252646000 2.750129000  H 2.430058000 0.087024000 0.577636000  H -0.520757000 2.832084000 -0.899559000  H -1.222101000 3.343394000 1.425412000  H -0.651648000 4.648002000 5.867615000  O 0.400596000 -2.642187000 6.344690000  O 0.051389000 -2.238998000 3.646331000  O -1.845397000 -0.584969000 3.206577000  O -2.730397000 0.811473000 5.389899000  O -1.757702000 -1.052384000 7.306225000  C -0.256789000 -2.063559000 2.318702000  C -1.296605000 -1.140646000 2.078775000  C -3.004857000 0.257215000 3.083088000  C -3.664166000 0.291932000 4.441042000  C -3.193290000 0.787531000 6.746006000  C -3.113902000 -0.597151000 7.363395000  C -1.619490000 -2.416848000 7.718073000  C -0.151429000 -2.792068000 7.659952000  C 0.158364000 -3.751160000 5.471534000  C 0.720584000 -3.428724000 4.103300000  C 0.399279000 -2.660102000 1.246914000  C 0.007513000 -2.371007000 -0.064311000  C -1.036133000 -1.467364000 -0.300662000  C -1.666406000 -0.826257000 0.781609000  H -3.705305000 -0.168243000 2.358708000  H -2.695090000 1.252679000 2.750079000  H -4.552559000 0.935037000 4.400037000  H -4.225013000 1.155687000 6.801555000  H -2.543065000 1.481468000 7.282988000  H -3.756337000 -1.310842000 6.832979000  H -3.448426000 -0.545902000 8.408026000  H -1.978789000 -2.535681000 8.748883000  H -2.226271000 -3.055757000 7.063453000  H -0.015879000 -3.821157000 8.012727000  H 0.428255000 -2.121400000 8.300682000  H -0.917735000 -3.943701000 5.389307000  H 0.651605000 -4.647970000 5.867638000  H 0.518368000 -4.261795000 3.424781000  H 1.796268000 -3.235505000 4.143993000  H 1.222095000 -3.343420000 1.425421000  H 0.520758000 -2.832130000 -0.899557000  H -2.430022000 -0.087013000 0.577605000  H -3.974033000 -0.721727000 4.719502000  N -1.361502000 2.613429000 -4.884598000  H -1.192138000 2.858917000 -3.916871000  C -1.281963000 3.612227000 -5.820798000  C -1.036517000 4.979711000 -5.264021000  C -0.480862000 7.569137000 -4.350526000  C -0.515115000 5.943203000 -6.138152000  C -1.296411000 5.330889000 -3.930241000  C -1.018337000 6.619828000 -3.478158000  C -0.233461000 7.229130000 -5.683646000  H -0.319755000 5.662910000 -7.166934000  H -1.739281000 4.620532000 -3.238781000  H -1.223590000 6.881849000 -2.444652000  H 0.182040000 7.964596000 -6.366151000  O -1.382718000 3.407496000 -7.032927000  N 1.361520000 -2.613453000 -4.884601000  H 1.192200000 -2.858957000 -3.916872000  C 1.281924000 -3.612218000 -5.820829000  C 1.036543000 -4.979736000 -5.264103000  C 0.481006000 -7.569236000 -4.350732000  C 1.296554000 -5.331002000 -3.930368000  C 0.515083000 -5.943181000 -6.138251000  C 0.233483000 -7.229142000 -5.683807000  C 1.018542000 -6.619975000 -3.478348000  H 1.739467000 -4.620691000 -3.238889000  H 0.319638000 -5.662824000 -7.167000000  H -0.182065000 -7.964568000 -6.366326000  H 1.223885000 -6.882060000 -2.444876000  O 1.382584000 -3.407424000 -7.032955000  Ba 0.000006000 0.000014000 5.385056000  H -0.259451000 8.570872000 -3.993903000  H 0.259643000 -8.570998000 -3.994157000 | Cartesian coordinates (Å):  C -6.049737000 -0.121615000 -1.299056000  C -6.835344000 0.274113000 -2.383889000  C -6.225154000 0.842538000 -3.496656000  C -4.842616000 1.049610000 -3.523399000  C -4.052311000 0.734539000 -2.393411000  C -4.675484000 0.109426000 -1.300944000  C -4.233505000 1.510122000 -4.796832000  C -2.762932000 1.510857000 -4.878736000  C -1.976063000 1.346205000 -3.710399000  C -2.598514000 1.041995000 -2.409967000  C -2.154027000 1.724067000 -6.113481000  C -0.766566000 1.773777000 -6.236241000  C 0.028738000 1.667929000 -5.094633000  C -0.579613000 1.498777000 -3.821796000  O -4.937068000 1.840917000 -5.756263000  N -1.801434000 1.041277000 -1.383039000  O 0.255862000 1.459079000 -2.771233000  H -6.505434000 -0.609592000 -0.442953000  H -7.908197000 0.108545000 -2.374091000  H -6.799685000 1.104459000 -4.377035000  H -4.094427000 -0.211150000 -0.449015000  H -2.782257000 1.846643000 -6.987824000  H -0.296950000 1.897912000 -7.200540000  H -0.343577000 1.273053000 -1.965682000  C 6.050121000 0.122226000 -1.299325000  C 6.835635000 -0.273426000 -2.384251000  C 6.225352000 -0.841822000 -3.496982000  C 4.842821000 -1.048947000 -3.523592000  C 4.052618000 -0.733990000 -2.393500000  C 4.675879000 -0.108875000 -1.301082000  C 4.233595000 -1.509344000 -4.797007000  C 2.763014000 -1.510155000 -4.878753000  C 1.976244000 -1.345629000 -3.710326000  C 2.598829000 -1.041515000 -2.409932000  C 2.154009000 -1.723274000 -6.113463000  C 0.766540000 -1.772984000 -6.236116000  C -0.028668000 -1.667260000 -5.094434000  C 0.579772000 -1.498232000 -3.821626000  O 4.937073000 -1.840241000 -5.756465000  N 1.801826000 -1.040896000 -1.382942000  O -0.255684000 -1.458689000 -2.771037000  H 6.505884000 0.610192000 -0.443251000  H 7.908481000 -0.107805000 -2.374560000  H 6.799801000 -1.103660000 -4.377439000  H 4.094900000 0.211656000 -0.449085000  H 2.782166000 -1.845749000 -6.987872000  H 0.296845000 -1.897033000 -7.200388000  H 0.343703000 -1.272775000 -1.965406000  O -2.126015000 0.971676000 6.808001000  O -2.623176000 0.751790000 4.108131000  O -1.379874000 -1.133639000 2.945449000  O -0.009090000 -2.770229000 4.645318000  O -1.224633000 -1.717688000 7.022799000  C -2.537115000 0.885709000 2.743500000  C -1.850485000 -0.164978000 2.095278000  C -0.826185000 -2.355229000 2.425683000  C -0.795197000 -3.328073000 3.583481000  C -0.100012000 -3.498990000 5.881621000  C -1.319300000 -3.109621000 6.698108000  C -2.307685000 -1.249967000 7.832891000  C -2.135371000 0.243622000 8.045523000  C -3.429695000 1.234740000 6.274427000  C -3.287727000 1.771596000 4.869225000  C -3.012233000 1.960925000 2.001368000  C -2.816808000 1.992608000 0.616269000  C -2.136414000 0.952708000 -0.022281000  C -1.636450000 -0.130104000 0.724877000  H 0.174094000 -2.164541000 2.027416000  H -1.466680000 -2.752484000 1.632217000  H -1.817608000 -3.515879000 3.929493000  H 0.808495000 -3.252222000 6.435819000  H -0.114527000 -4.576684000 5.683471000  H -1.335879000 -3.706175000 7.619699000  H -2.252374000 -3.292197000 6.149498000  H -2.292553000 -1.757267000 8.806487000  H -3.259611000 -1.480024000 7.337650000  H -1.166946000 0.446750000 8.510784000  H -2.927982000 0.620998000 8.701831000  H -3.942341000 1.975414000 6.900341000  H -4.024802000 0.315002000 6.254305000  H -4.283501000 1.965282000 4.457563000  H -2.693294000 2.690588000 4.838332000  H -3.522941000 2.783252000 2.487886000  H -1.082683000 -0.912924000 0.222177000  H -0.351719000 -4.275531000 3.253258000  O 0.008987000 2.769573000 4.645842000  O 1.379992000 1.133321000 2.945838000  O 2.623155000 -0.752315000 4.108321000  O 2.125588000 -0.972748000 6.808085000  O 1.224196000 1.716575000 7.023293000  C 1.850705000 0.164819000 2.095543000  C 2.537252000 -0.885990000 2.743656000  C 3.287564000 -1.772291000 4.869309000  C 3.429339000 -1.235725000 6.274641000  C 2.134783000 -0.244939000 8.045754000  C 2.307141000 1.248689000 7.833432000  C 1.318905000 3.108571000 6.698889000  C 0.099733000 3.498093000 5.882300000  C 0.795245000 3.327628000 3.584226000  C 0.826389000 2.355020000 2.426234000  C 1.636804000 0.130185000 0.725119000  C 2.136803000 -0.952517000 -0.022172000  C 2.817120000 -1.992538000 0.616266000  C 3.012433000 -1.961083000 2.001385000  H 4.283396000 -1.965921000 4.457758000  H 2.693110000 -2.691260000 4.838146000  H 3.941882000 -1.976538000 6.900474000  H 2.927304000 -0.622452000 8.702093000  H 1.166293000 -0.448150000 8.510843000  H 3.259131000 1.478829000 7.338352000  H 2.291895000 1.755806000 8.807121000  H 1.335342000 3.704947000 7.620597000  H 2.252060000 3.291261000 6.150453000  H 0.114268000 4.575825000 5.684364000  H -0.808849000 3.251209000 6.436325000  H 1.817609000 3.515350000 3.930419000  H 0.351820000 4.275160000 3.254141000  H 1.467006000 2.752431000 1.632944000  H -0.173832000 2.164417000 2.027779000  H 1.083077000 0.913087000 0.222503000  H 3.523064000 -2.783512000 2.487811000  H 4.024466000 -0.315994000 6.254794000  N -1.419628000 -1.727110000 -5.064312000  H -1.803709000 -1.652914000 -4.130425000  C -2.301950000 -1.708014000 -6.114482000  C -3.741697000 -1.815507000 -5.726402000  C -6.471502000 -2.027167000 -5.145431000  C -4.697808000 -1.377430000 -6.652220000  C -4.165465000 -2.369521000 -4.507387000  C -5.524633000 -2.477270000 -4.222592000  C -6.056041000 -1.476036000 -6.360528000  H -4.360688000 -0.954422000 -7.592101000  H -3.446615000 -2.750060000 -3.788380000  H -5.843861000 -2.906163000 -3.278154000  H -6.790019000 -1.120946000 -7.077666000  O -1.947552000 -1.612444000 -7.292003000  N 1.419703000 1.727748000 -5.064628000  H 1.803869000 1.653430000 -4.130785000  C 2.301934000 1.708790000 -6.114875000  C 3.741709000 1.816225000 -5.726892000  C 6.471552000 2.027745000 -5.146064000  C 4.165563000 2.370025000 -4.507810000  C 4.697751000 1.378297000 -6.652850000  C 6.056003000 1.476830000 -6.361230000  C 5.524752000 2.477699000 -4.223083000  H 3.446761000 2.750439000 -3.788687000  H 4.360562000 0.955446000 -7.592777000  H 6.789928000 1.121845000 -7.078473000  H 5.844049000 2.906425000 -3.278592000  O 1.947437000 1.613481000 -7.292389000  Ba -0.000107000 -0.000381000 5.226063000  H 3.179136000 -2.832869000 0.034351000  H -3.178815000 2.833013000 0.034454000  H -7.530256000 -2.101897000 -4.915915000  H 7.530323000 2.102419000 -4.916606000 |
| 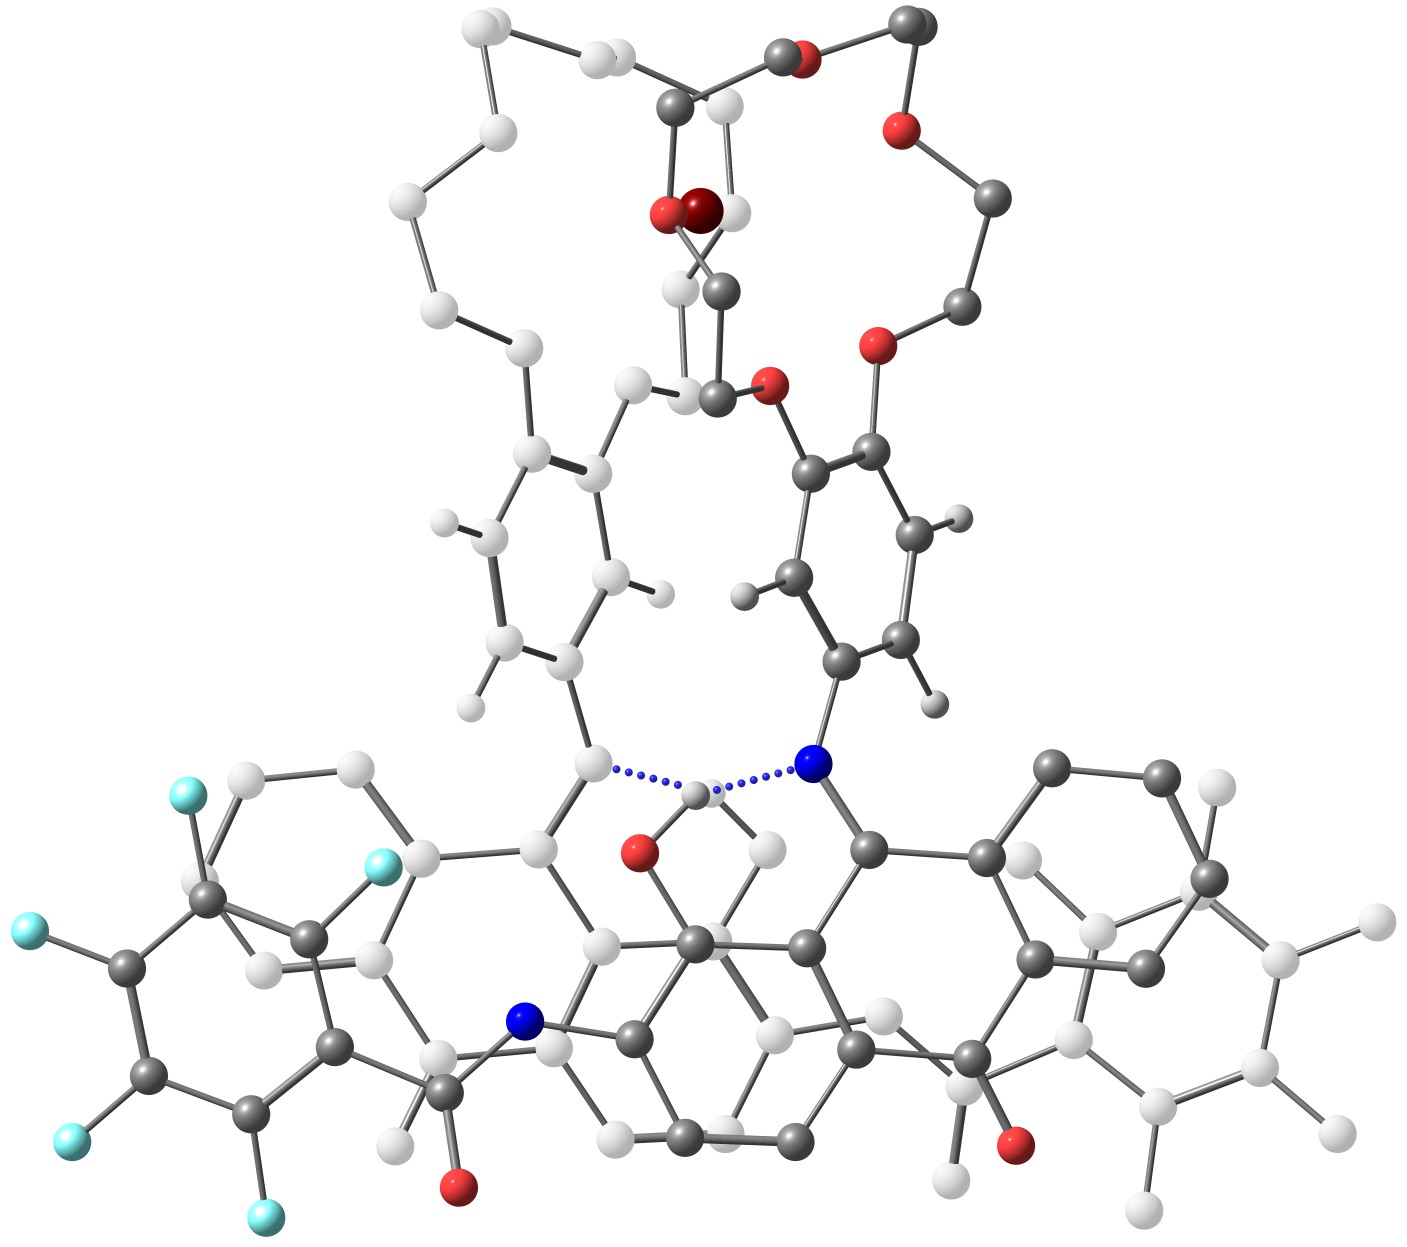 | 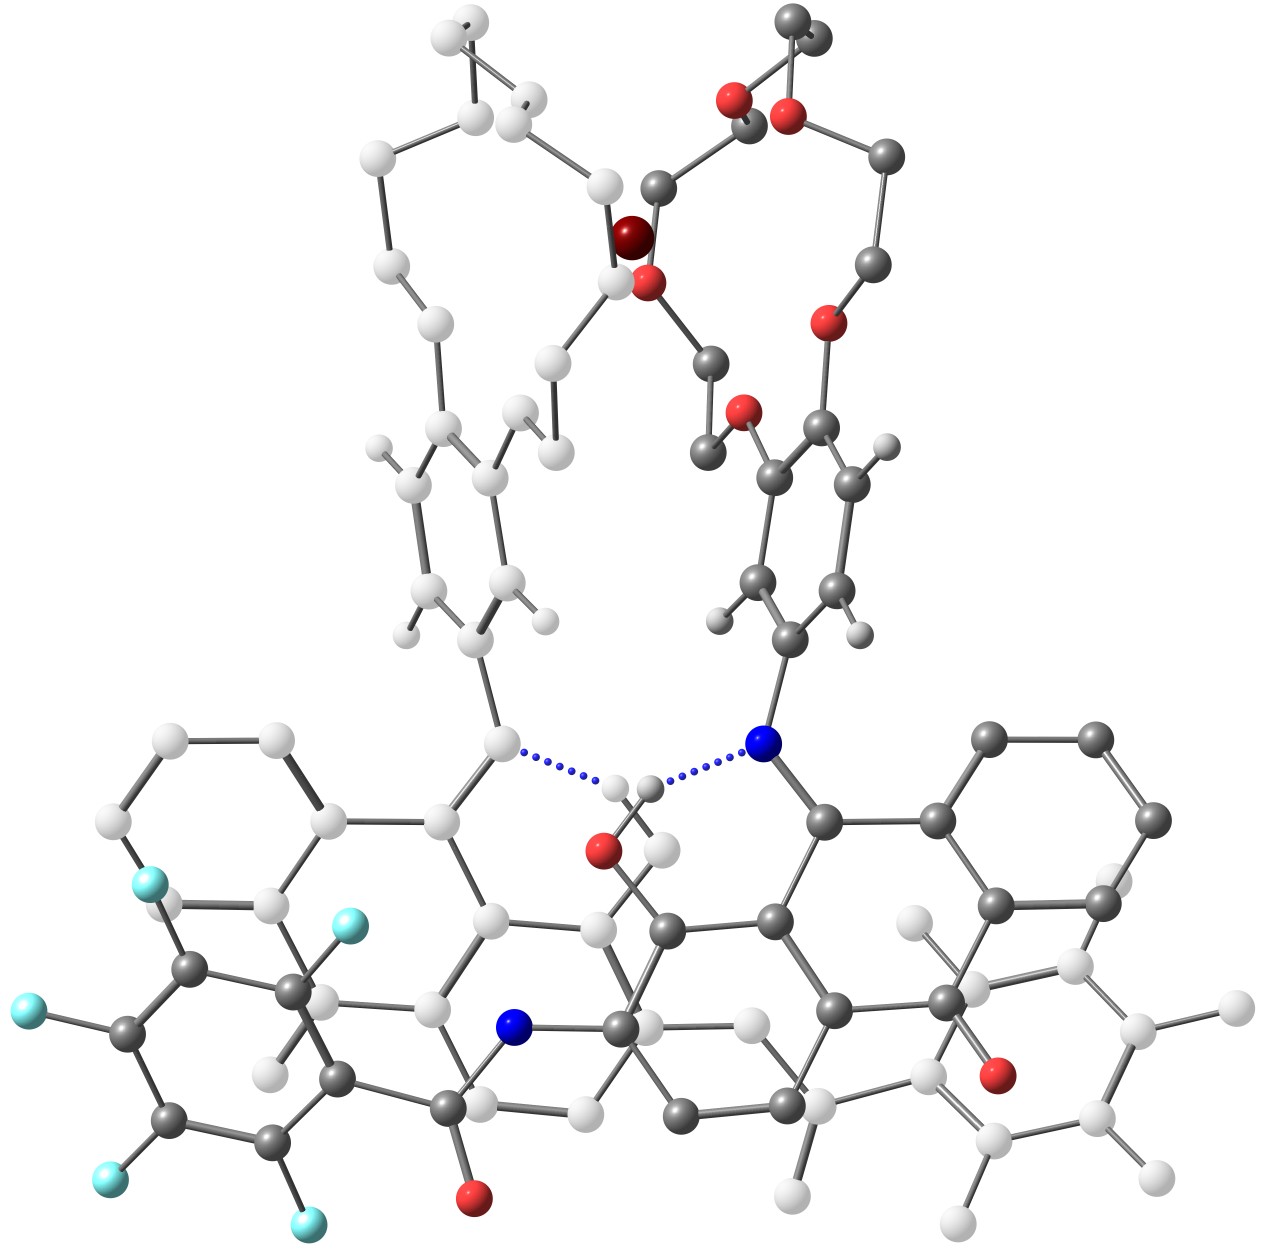 |
| *in*-[*anti-*(*s-trans-***2**)2]**·**Ba2+ | *out*-[*anti-*(*s-trans-***2**)2]**·**Ba2+ |
| DFT/CPCM energy = –5146.68343634 a.u. | DFT/CPCM energy = –5146.68472509 a.u. |
| Cartesian coordinates (Å):  C 1.349872000 5.587672000 2.210264000  C 2.616243000 6.178104000 2.251907000  C 3.744448000 5.386386000 2.069923000  C 3.621859000 4.014975000 1.819956000  C 2.342951000 3.414131000 1.747250000  C 1.216083000 4.222274000 1.971874000  C 4.869537000 3.221246000 1.683535000  C 4.743709000 1.755168000 1.701222000  C 3.465370000 1.145082000 1.654111000  C 2.233785000 1.948715000 1.538272000  C 5.901246000 0.978445000 1.728233000  C 5.839981000 -0.414085000 1.708026000  C 4.596332000 -1.040025000 1.647521000  C 3.407794000 -0.263763000 1.629893000  O 5.967136000 3.780172000 1.583938000  N 1.150365000 1.270038000 1.301030000  O 2.258580000 -0.951941000 1.569505000  H 0.461293000 6.189103000 2.374460000  H 2.720248000 7.244263000 2.427825000  H 4.739501000 5.812157000 2.123972000  H 0.226602000 3.788777000 1.974400000  H 6.861186000 1.480451000 1.750043000  H 6.739953000 -1.011421000 1.715050000  H 1.538772000 -0.231600000 1.430213000  C 1.349126000 -5.587635000 -2.210312000  C 2.615482000 -6.178102000 -2.252017000  C 3.743726000 -5.386420000 -2.070104000  C 3.621196000 -4.014993000 -1.820195000  C 2.342308000 -3.414114000 -1.747467000  C 1.215391000 -4.222229000 -1.971952000  C 4.868895000 -3.221282000 -1.683802000  C 4.743098000 -1.755205000 -1.701624000  C 3.464775000 -1.145087000 -1.654585000  C 2.233190000 -1.948683000 -1.538618000  C 5.900643000 -0.978496000 -1.728646000  C 5.839398000 0.414037000 -1.708435000  C 4.595759000 1.040000000 -1.647953000  C 3.407211000 0.263754000 -1.630403000  O 5.966516000 -3.780211000 -1.584430000  N 1.149757000 -1.269996000 -1.301491000  O 2.257988000 0.951931000 -1.570096000  H 0.460521000 -6.189052000 -2.374418000  H 2.719440000 -7.244267000 -2.427926000  H 4.738759000 -5.812236000 -2.124160000  H 0.225923000 -3.788695000 -1.974394000  H 6.860581000 -1.480510000 -1.750392000  H 6.739387000 1.011350000 -1.715416000  H 1.538149000 0.231579000 -1.431006000  O -5.772806000 -0.657083000 2.762915000  O -3.612039000 0.703317000 1.759772000  O -4.096926000 2.258869000 -0.212450000  O -6.808587000 2.602605000 -0.547291000  O -7.715898000 1.137347000 1.719529000  C -2.501878000 1.266642000 1.183966000  C -2.766854000 2.136193000 0.104198000  C -4.583239000 3.397584000 -0.947825000  C -5.947975000 3.735609000 -0.387017000  C -8.117656000 2.769131000 0.015057000  C -8.149192000 2.484952000 1.504374000  C -7.746691000 0.762281000 3.100529000  C -7.121116000 -0.613113000 3.247494000  C -4.811017000 -0.079092000 3.647906000  C -3.464567000 -0.070514000 2.964392000  C -1.196606000 1.012793000 1.568172000  C -0.132555000 1.667866000 0.918442000  C -0.392515000 2.521337000 -0.161130000  C -1.711831000 2.742580000 -0.571013000  H -4.634976000 3.134127000 -2.007836000  H -3.916178000 4.252317000 -0.808629000  H -5.853756000 3.996082000 0.673731000  H -8.757118000 2.055796000 -0.512833000  H -8.486510000 3.783221000 -0.178247000  H -9.176279000 2.611700000 1.871545000  H -7.495220000 3.169208000 2.060286000  H -8.784919000 0.725737000 3.456263000  H -7.208605000 1.514278000 3.690784000  H -7.664693000 -1.344871000 2.645810000  H -7.157012000 -0.922865000 4.299063000  H -4.748407000 -0.671448000 4.569666000  H -5.092671000 0.947930000 3.906187000  H -2.734300000 0.400408000 3.628378000  H -3.126212000 -1.078578000 2.705714000  H -0.968992000 0.311376000 2.360469000  H 0.426176000 2.998182000 -0.686906000  H -1.908993000 3.385599000 -1.421386000  H -6.362965000 4.594759000 -0.929356000  O -6.808995000 -2.601933000 0.548386000  O -4.097349000 -2.258741000 0.212643000  O -3.612729000 -0.703986000 -1.760365000  O -5.773497000 0.656744000 -2.763140000  O -7.716451000 -1.137610000 -1.718965000  C -2.767328000 -2.136166000 -0.104239000  C -2.502488000 -1.266987000 -1.184360000  C -3.465267000 0.070269000 -2.964732000  C -4.811697000 0.079007000 -3.648296000  C -7.121932000 0.612517000 -3.247411000  C -7.747251000 -0.762957000 -3.100082000  C -8.149577000 -2.485195000 -1.503341000  C -8.118049000 -2.768788000 -0.013910000  C -5.948496000 -3.735116000 0.388768000  C -4.583608000 -3.396827000 0.949007000  C -1.712201000 -2.742361000 0.570985000  C -0.392932000 -2.521183000 0.160911000  C -0.133117000 -1.667931000 -0.918859000  C -1.197260000 -1.013155000 -1.568721000  H -2.734955000 -0.400370000 -3.628865000  H -3.127011000 1.078277000 -2.705678000  H -4.749074000 0.671638000 -4.569874000  H -7.158108000 0.922149000 -4.298998000  H -7.665504000 1.344271000 -2.645687000  H -7.208972000 -1.515001000 -3.690103000  H -8.785470000 -0.726724000 -3.455871000  H -9.176629000 -2.612199000 -1.870515000  H -7.495487000 -3.169572000 -2.058966000  H -8.486826000 -3.782831000 0.179783000  H -8.757593000 -2.055300000 0.513673000  H -5.854543000 -3.996394000 -0.671806000  H -6.363433000 -4.593832000 0.931837000  H -3.916685000 -4.251748000 0.810300000  H -4.635083000 -3.132527000 2.008812000  H -1.909233000 -3.385119000 1.421585000  H 0.425828000 -2.997837000 0.686749000  H -0.969735000 -0.311962000 -2.361241000  H -5.093360000 -0.947937000 -3.906863000  N 4.366130000 2.411549000 -1.535987000  H 3.390729000 2.636997000 -1.382073000  C 5.257314000 3.439810000 -1.636489000  C 4.674881000 4.797747000 -1.335955000  C 3.678130000 7.357887000 -0.653916000  C 5.519238000 5.817875000 -0.870671000  C 3.315465000 5.125072000 -1.449881000  C 2.812318000 6.372173000 -1.111891000  C 5.033237000 7.077429000 -0.534352000  O 6.445383000 3.291454000 -1.908604000  N 4.366698000 -2.411583000 1.535642000  H 3.391286000 -2.637006000 1.381742000  C 5.257814000 -3.439872000 1.636434000  C 4.675296000 -4.797804000 1.336048000  C 3.678366000 -7.357947000 0.654327000  C 3.315857000 -5.125001000 1.449995000  C 5.519583000 -5.818046000 0.870887000  C 5.033497000 -7.077609000 0.534734000  C 2.812616000 -6.372104000 1.112143000  O 6.445916000 -3.291532000 1.908412000  Ba -5.812719000 0.000267000 -0.000372000  F 2.412172000 4.218684000 -1.882019000  F 1.502094000 6.620252000 -1.205102000  F 3.203741000 8.549882000 -0.293449000  F 5.865275000 8.009678000 -0.057949000  F 6.825083000 5.617733000 -0.687581000  F 2.412659000 -4.218492000 1.882073000  F 1.502381000 -6.620092000 1.205432000  F 3.203906000 -8.549982000 0.294082000  F 5.865471000 -8.010001000 0.058495000  F 6.825447000 -5.618012000 0.687816000 | Cartesian coordinates (Å):  C -0.793152000 -6.046266000 0.345085000  C -1.846040000 -6.798016000 0.873306000  C -2.926058000 -6.142803000 1.455267000  C -2.952538000 -4.745831000 1.537284000  C -1.845926000 -3.985367000 1.094350000  C -0.787258000 -4.657967000 0.462778000  C -4.216358000 -4.099106000 1.970766000  C -4.315294000 -2.637853000 1.808010000  C -3.156670000 -1.866508000 1.540016000  C -1.859792000 -2.509655000 1.268520000  C -5.555332000 -2.020576000 1.961692000  C -5.688869000 -0.636889000 1.854878000  C -4.552430000 0.148621000 1.660077000  C -3.275184000 -0.462614000 1.548521000  O -5.165450000 -4.770558000 2.388036000  N -0.837019000 -1.714736000 1.166842000  O -2.231825000 0.369462000 1.414002000  H 0.031480000 -6.540453000 -0.158827000  H -1.842591000 -7.880271000 0.794491000  H -3.786821000 -6.695763000 1.814157000  H 0.040671000 -4.104231000 0.044736000  H -6.424240000 -2.637946000 2.153750000  H -6.656565000 -0.164467000 1.932720000  H -1.423516000 -0.239376000 1.274921000  C -0.793883000 6.046345000 -0.344355000  C -1.846892000 6.797985000 -0.872488000  C -2.926709000 6.142667000 -1.454708000  C -2.952897000 4.745708000 -1.537002000  C -1.846180000 3.985374000 -1.094112000  C -0.787687000 4.658071000 -0.462345000  C -4.216493000 4.098814000 -1.970882000  C -4.315234000 2.637535000 -1.808200000  C -3.156534000 1.866337000 -1.540111000  C -1.859775000 2.509674000 -1.268454000  C -5.555171000 2.020099000 -1.962026000  C -5.688529000 0.636387000 -1.855304000  C -4.552012000 -0.148977000 -1.660396000  C -3.274862000 0.462424000 -1.548649000  O -5.165690000 4.770164000 -2.388069000  N -0.836897000 1.714914000 -1.166751000  O -2.231429000 -0.369553000 -1.413944000  H 0.030613000 6.540600000 0.159713000  H -1.843708000 7.880222000 -0.793405000  H -3.787506000 6.695537000 -1.813651000  H 0.040340000 4.104430000 -0.044377000  H -6.424155000 2.637352000 -2.154127000  H -6.656149000 0.163840000 -1.933323000  H -1.423183000 0.239305000 -1.274657000  O 7.347946000 -2.049975000 1.111045000  O 4.648566000 -2.573851000 0.913185000  O 3.485210000 -1.451431000 -1.047583000  O 5.188270000 -0.186740000 -2.766401000  O 7.569184000 -1.328015000 -1.632233000  C 3.284726000 -2.476121000 1.042230000  C 2.635681000 -1.857678000 -0.050121000  C 2.967553000 -0.975307000 -2.303057000  C 4.127905000 -1.008404000 -3.273146000  C 6.427050000 -0.324900000 -3.483312000  C 7.241843000 -1.516944000 -3.014014000  C 8.377384000 -2.378070000 -1.091661000  C 8.587117000 -2.106250000 0.387524000  C 6.817020000 -3.333447000 1.464202000  C 5.408763000 -3.158461000 1.982449000  C 2.544217000 -2.880762000 2.147044000  C 1.160109000 -2.680621000 2.169571000  C 0.521373000 -2.063512000 1.091104000  C 1.266045000 -1.636674000 -0.024343000  H 2.570675000 0.035727000 -2.176677000  H 2.173723000 -1.638541000 -2.660133000  H 4.474764000 -2.040919000 -3.391002000  H 6.981132000 0.596633000 -3.291015000  H 6.232433000 -0.407161000 -4.558554000  H 8.162249000 -1.575555000 -3.609653000  H 6.691250000 -2.459212000 -3.131596000  H 9.352036000 -2.397400000 -1.596783000  H 7.881722000 -3.342776000 -1.258376000  H 9.050590000 -1.125675000 0.526292000  H 9.243568000 -2.870886000 0.818405000  H 7.440328000 -3.788952000 2.243351000  H 6.803988000 -3.993616000 0.590003000  H 5.000413000 -4.139159000 2.246939000  H 5.370324000 -2.497776000 2.854688000  H 3.031253000 -3.338561000 2.999477000  H 0.763208000 -1.131108000 -0.839053000  H 3.800041000 -0.629129000 -4.248873000  O 5.188418000 0.187052000 2.766370000  O 3.485323000 1.451950000 1.047703000  O 4.648638000 2.574269000 -0.913093000  O 7.347989000 2.050238000 -1.111144000  O 7.569314000 1.328274000 1.632110000  C 2.635771000 1.858132000 0.050251000  C 3.284781000 2.476561000 -1.042123000  C 5.408798000 3.158829000 -1.982412000  C 6.817110000 3.333734000 -1.464289000  C 8.587202000 2.106456000 -0.387678000  C 8.377548000 2.378289000 1.091515000  C 7.242044000 1.517199000 3.013909000  C 6.427236000 0.325176000 3.483233000  C 4.128097000 1.008731000 3.273200000  C 2.967708000 0.975737000 2.303155000  C 1.266147000 1.637055000 0.024497000  C 0.521445000 2.063829000 -1.090942000  C 1.160134000 2.680998000 -2.169417000  C 2.544236000 2.881189000 -2.146921000  H 5.000490000 4.139552000 -2.246875000  H 5.370261000 2.498143000 -2.854649000  H 7.440368000 3.789171000 -2.243519000  H 9.243669000 2.871054000 -0.818600000  H 9.050614000 1.125856000 -0.526464000  H 7.881944000 3.343020000 1.258253000  H 9.352220000 2.397566000 1.596599000  H 8.162479000 1.575762000 3.609507000  H 6.691496000 2.459488000 3.131529000  H 6.232660000 0.407433000 4.558482000  H 6.981287000 -0.596368000 3.290905000  H 4.475005000 2.041225000 3.391097000  H 3.800259000 0.629415000 4.248918000  H 2.173904000 1.638955000 2.660320000  H 2.570800000 -0.035278000 2.176716000  H 0.763365000 1.131464000 0.839224000  H 3.031233000 3.339003000 -2.999369000  H 6.804215000 3.993935000 -0.590113000  N -4.528289000 -1.539677000 -1.550080000  H -3.595618000 -1.920187000 -1.440370000  C -5.583304000 -2.404440000 -1.525632000  C -5.198521000 -3.849929000 -1.361722000  C -4.610973000 -6.591690000 -1.087279000  C -6.034321000 -4.706326000 -0.634112000  C -4.059316000 -4.419942000 -1.944575000  C -3.761925000 -5.769637000 -1.819479000  C -5.743173000 -6.056837000 -0.484020000  O -6.759930000 -2.065300000 -1.614541000  N -4.528877000 1.539308000 1.549686000  H -3.596236000 1.919933000 1.440143000  C -5.584011000 2.403931000 1.524968000  C -5.199365000 3.849497000 1.361440000  C -4.611966000 6.591375000 1.087504000  C -4.060341000 4.419543000 1.944615000  C -6.035088000 4.705956000 0.633784000  C -5.744023000 6.056515000 0.483974000  C -3.763031000 5.769279000 1.819775000  O -6.760602000 2.064619000 1.613621000  Ba 5.768094000 0.000168000 -0.000014000  H 0.580191000 2.984775000 -3.033804000  H 0.580201000 -2.984443000 3.033966000  F -4.309999000 7.879133000 0.919661000  F -2.655140000 6.275712000 2.370694000  F -6.521217000 6.834309000 -0.275604000  F -7.112871000 4.238498000 -0.003354000  F -3.198163000 3.663277000 2.646706000  F -3.197125000 -3.663668000 -2.646647000  F -2.653942000 -6.276109000 -2.370178000  F -4.308992000 -7.879431000 -0.919275000  F -6.520431000 -6.834567000 0.275550000  F -7.112327000 -4.238836000 0.002640000 |
| 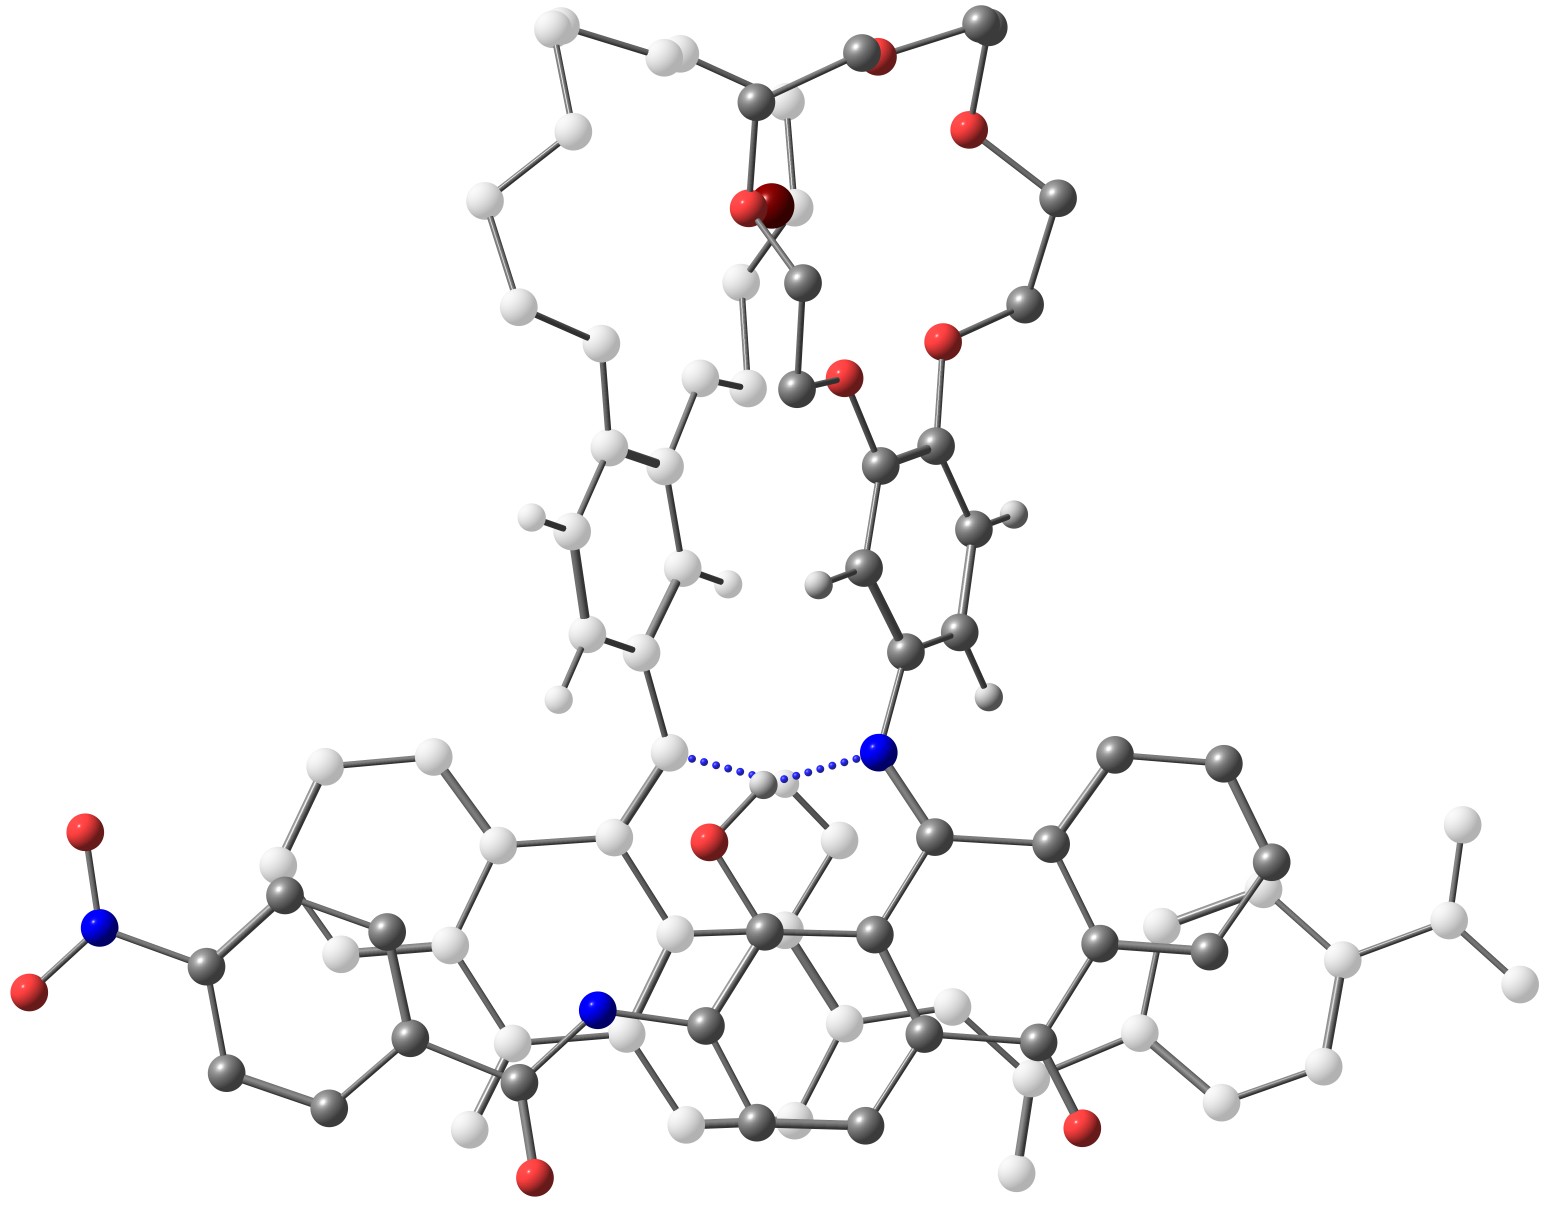 | 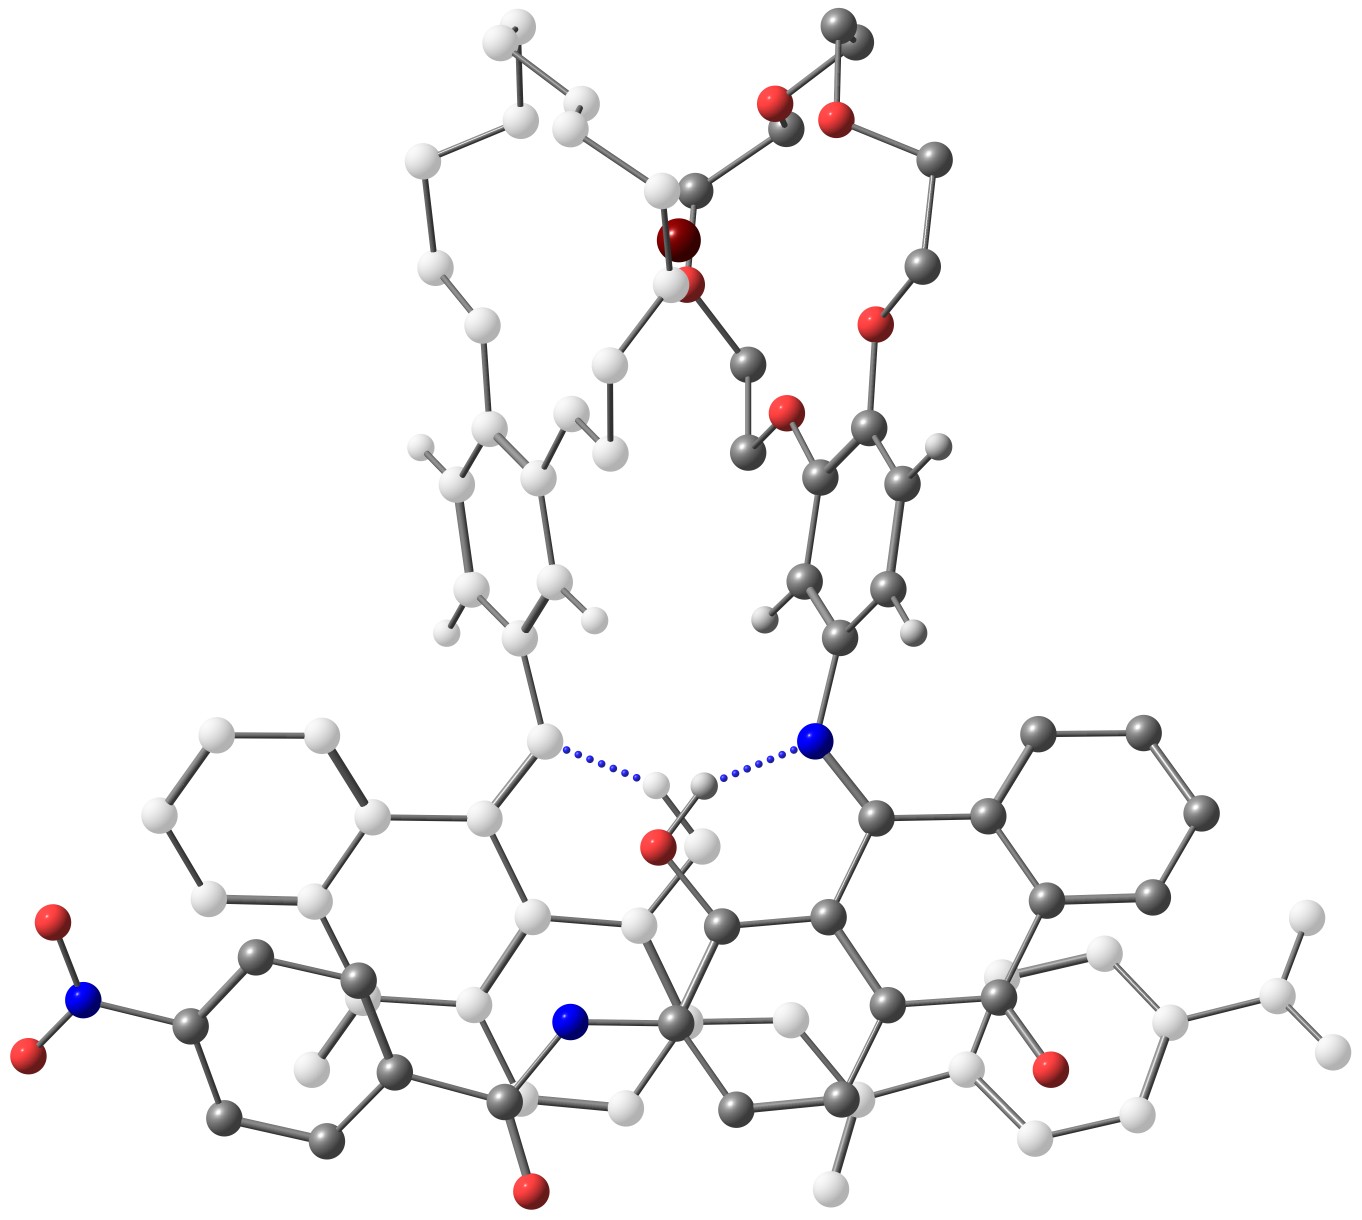 |
| *in*-[*anti-*(*s-trans-***3**)2]**·**Ba2+ | *out*-[*anti-*(*s-trans-***3**)2]**·**Ba2+ |
| DFT/CPCM energy = –4563.44857731 a.u. | DFT/CPCM energy = –4563.45072377 a.u. |
| Cartesian coordinates (Å):  C 2.078730000 5.543804000 -1.533283000  C 2.085979000 6.150934000 -2.792409000  C 1.935839000 5.365093000 -3.928512000  C 1.743449000 3.983303000 -3.821232000  C 1.688290000 3.366286000 -2.548945000  C 1.889986000 4.169498000 -1.413883000  C 1.657832000 3.197013000 -5.077251000  C 1.686948000 1.729507000 -4.962768000  C 1.644557000 1.104665000 -3.691517000  C 1.514976000 1.894839000 -2.452848000  C 1.725259000 0.965347000 -6.127940000  C 1.719430000 -0.427311000 -6.081768000  C 1.664409000 -1.068587000 -4.845167000  C 1.638723000 -0.305284000 -3.648486000  O 1.595015000 3.760119000 -6.175479000  N 1.292929000 1.203547000 -1.373318000  O 1.589925000 -1.005255000 -2.505261000  H 2.226453000 6.140358000 -0.638415000  H 2.220361000 7.224187000 -2.883444000  H 1.966116000 5.802961000 -4.918596000  H 1.913406000 3.725872000 -0.429326000  H 1.744078000 1.478004000 -7.082228000  H 1.734109000 -1.015539000 -6.987263000  H 1.446069000 -0.293514000 -1.777420000  C -2.078631000 -5.543990000 -1.533316000  C -2.085842000 -6.151059000 -2.792472000  C -1.935663000 -5.365163000 -3.928532000  C -1.743261000 -3.983380000 -3.821180000  C -1.688179000 -3.366422000 -2.548865000  C -1.889897000 -4.169689000 -1.413847000  C -1.657493000 -3.197035000 -5.077148000  C -1.686716000 -1.729536000 -4.962610000  C -1.644382000 -1.104725000 -3.691333000  C -1.514899000 -1.894984000 -2.452684000  C -1.725018000 -0.965359000 -6.127773000  C -1.719225000 0.427297000 -6.081593000  C -1.664286000 1.068551000 -4.844980000  C -1.638611000 0.305245000 -3.648309000  O -1.594980000 -3.760095000 -6.175417000  N -1.292948000 -1.203821000 -1.373054000  O -1.589800000 1.005306000 -2.505146000  H -2.226384000 -6.140584000 -0.638480000  H -2.220207000 -7.224310000 -2.883564000  H -1.965906000 -5.802983000 -4.918637000  H -1.913355000 -3.726106000 -0.429271000  H -1.743780000 -1.478006000 -7.082068000  H -1.733890000 1.015537000 -6.987081000  H -1.445850000 0.293622000 -1.777260000  O 2.779132000 -0.592982000 5.577732000  O 1.763767000 0.735865000 3.404481000  O -0.269291000 2.221770000 3.857137000  O -0.597080000 2.604207000 6.563344000  O 1.690567000 1.190300000 7.501235000  C 1.171577000 1.258160000 2.282791000  C 0.058693000 2.090015000 2.529975000  C -1.017901000 3.358374000 4.328201000  C -0.456942000 3.726663000 5.685230000  C -0.041529000 2.801035000 7.871122000  C 1.451938000 2.540969000 7.912673000  C 3.076513000 0.835930000 7.550561000  C 3.251586000 -0.538492000 6.929751000  C 3.658914000 0.004645000 4.623277000  C 2.988786000 -0.006425000 3.270209000  C 1.570323000 0.995279000 0.982982000  C 0.895089000 1.600430000 -0.093476000  C -0.219520000 2.412678000 0.149756000  C -0.639711000 2.646605000 1.463179000  H -2.073867000 3.081091000 4.389612000  H -0.894086000 4.203019000 3.645392000  H 0.599392000 4.001818000 5.583338000  H -0.560155000 2.090231000 8.520985000  H -0.251943000 3.817862000 8.222674000  H 1.812438000 2.689354000 8.939185000  H 1.999930000 3.223663000 7.250428000  H 3.419831000 0.807313000 8.593172000  H 3.662247000 1.595162000 7.017841000  H 2.658064000 -1.279282000 7.470359000  H 4.307805000 -0.830729000 6.975361000  H 4.595630000 -0.564767000 4.571142000  H 3.889002000 1.038310000 4.904936000  H 3.647682000 0.480628000 2.545689000  H 2.760043000 -1.021289000 2.930733000  H 2.391939000 0.323664000 0.770833000  H -0.766802000 2.842130000 -0.681047000  H -1.516741000 3.257145000 1.647037000  H -1.011182000 4.583459000 6.089178000  O 0.597075000 -2.603917000 6.563674000  O 0.269136000 -2.221862000 3.857442000  O -1.763926000 -0.736000000 3.404683000  O -2.779184000 0.593141000 5.577794000  O -1.690521000 -1.189872000 7.501491000  C -0.058890000 -2.090262000 2.530278000  C -1.171767000 -1.258415000 2.283035000  C -2.988941000 0.006285000 3.270363000  C -3.659014000 -0.004604000 4.623459000  C -3.251570000 0.538839000 6.929843000  C -3.076464000 -0.835496000 7.550837000  C -1.451869000 -2.540483000 7.913104000  C 0.041595000 -2.800557000 7.871511000  C 0.456889000 -3.726500000 5.685730000  C 1.017773000 -3.358400000 4.328620000  C 0.639487000 -2.646967000 1.463524000  C 0.219317000 -2.413105000 0.150084000  C -0.895246000 -1.600814000 -0.093207000  C -1.570501000 -0.995613000 0.983210000  H -3.647873000 -0.480855000 2.545933000  H -2.760202000 1.021103000 2.930746000  H -4.595727000 0.564809000 4.571291000  H -4.307787000 0.831080000 6.975466000  H -2.658022000 1.279704000 7.470319000  H -3.662225000 -1.594804000 7.018255000  H -3.419729000 -0.806733000 8.593463000  H -1.812313000 -2.688724000 8.939657000  H -1.999896000 -3.223270000 7.250986000  H 0.252026000 -3.817333000 8.223196000  H 0.560257000 -2.089661000 8.521244000  H -0.599450000 -4.001670000 5.583935000  H 1.011153000 -4.583237000 6.089769000  H 0.893924000 -4.203139000 3.645933000  H 2.073742000 -3.081107000 4.389937000  H 1.516517000 -3.257494000 1.647426000  H 0.766618000 -2.842590000 -0.680690000  H -2.392072000 -0.323959000 0.771010000  H -3.889098000 -1.038231000 4.905263000  N -1.586573000 2.446355000 -4.638577000  H -1.428156000 2.686638000 -3.667389000  C -1.602243000 3.456554000 -5.557763000  C -1.401759000 4.831646000 -4.984297000  C -0.872846000 7.385216000 -4.060873000  C -0.990410000 5.832378000 -5.874999000  C -1.579376000 5.140983000 -3.626729000  C -1.307869000 6.419642000 -3.155522000  C -0.722763000 7.117496000 -5.420773000  H -0.861746000 5.583080000 -6.920974000  H -1.939696000 4.403085000 -2.918554000  H -1.422680000 6.664932000 -2.108176000  H -0.384359000 7.893081000 -6.095346000  O -1.735470000 3.277036000 -6.769073000  N 1.586670000 -2.446401000 -4.638833000  H 1.428117000 -2.686745000 -3.667683000  C 1.602464000 -3.456527000 -5.558097000  C 1.401808000 -4.831665000 -4.984806000  C 0.872663000 -7.385341000 -4.061806000  C 1.578923000 -5.141110000 -3.627197000  C 0.990839000 -5.832340000 -5.875749000  C 0.723082000 -7.117510000 -5.421738000  C 1.307291000 -6.419822000 -3.156205000  H 1.938936000 -4.403257000 -2.918819000  H 0.862562000 -5.582958000 -6.921750000  H 0.384972000 -7.893053000 -6.096506000  H 1.421720000 -6.665201000 -2.108838000  O 1.735889000 -3.276905000 -6.769371000  Ba -0.000026000 0.000080000 5.604324000  N 0.535362000 -8.717638000 -3.562314000  O 0.261132000 -9.595322000 -4.382870000  O 0.530713000 -8.895913000 -2.342015000  N -0.535647000 8.717445000 -3.561133000  O -0.531384000 8.895590000 -2.340813000  O -0.261173000 9.595220000 -4.381509000 | Cartesian coordinates (Å):  C 0.555537000 6.095438000 -1.018837000  C 1.089433000 6.833406000 -2.078655000  C 1.606391000 6.163666000 -3.182278000  C 1.630795000 4.764984000 -3.220801000  C 1.186730000 4.013503000 -2.108519000  C 0.609168000 4.703463000 -1.029859000  C 2.024526000 4.112110000 -4.494639000  C 1.834390000 2.653724000 -4.592404000  C 1.561625000 1.886456000 -3.431968000  C 1.309641000 2.532640000 -2.132307000  C 1.980459000 2.032986000 -5.831453000  C 1.862849000 0.650335000 -5.963978000  C 1.661614000 -0.131783000 -4.826671000  C 1.554529000 0.481903000 -3.550311000  O 2.449449000 4.774908000 -5.445353000  N 1.184577000 1.733362000 -1.114493000  O 1.414528000 -0.349625000 -2.506729000  H 0.099478000 6.603228000 -0.174723000  H 1.063820000 7.918073000 -2.060479000  H 1.963613000 6.708125000 -4.048819000  H 0.187442000 4.161516000 -0.196274000  H 2.186260000 2.647495000 -6.699838000  H 1.935588000 0.174942000 -6.930870000  H 1.274544000 0.262522000 -1.700031000  C -0.555555000 -6.095468000 -1.018819000  C -1.089445000 -6.833431000 -2.078643000  C -1.606390000 -6.163686000 -3.182269000  C -1.630788000 -4.765005000 -3.220789000  C -1.186731000 -4.013528000 -2.108501000  C -0.609180000 -4.703493000 -1.029838000  C -2.024505000 -4.112125000 -4.494630000  C -1.834375000 -2.653738000 -4.592386000  C -1.561620000 -1.886476000 -3.431943000  C -1.309641000 -2.532665000 -2.132285000  C -1.980438000 -2.032992000 -5.831431000  C -1.862832000 -0.650340000 -5.963946000  C -1.661607000 0.131771000 -4.826632000  C -1.554530000 -0.481923000 -3.550276000  O -2.449425000 -4.774920000 -5.445348000  N -1.184578000 -1.733388000 -1.114470000  O -1.414542000 0.349597000 -2.506686000  H -0.099505000 -6.603261000 -0.174702000  H -1.063837000 -7.918098000 -2.060469000  H -1.963607000 -6.708142000 -4.048814000  H -0.187460000 -4.161549000 -0.196248000  H -2.186231000 -2.647496000 -6.699822000  H -1.935566000 -0.174940000 -6.930835000  H -1.274562000 -0.262555000 -1.699991000  O 1.130843000 2.035569000 7.077783000  O 0.950502000 2.555824000 4.378020000  O -1.024727000 1.465053000 3.209352000  O -2.763234000 0.221087000 4.909017000  O -1.621359000 1.346083000 7.294663000  C 1.079845000 2.460069000 3.014027000  C -0.021544000 1.861497000 2.361740000  C -2.285634000 1.005976000 2.689656000  C -3.257035000 1.050510000 3.848687000  C -3.481039000 0.366247000 6.146353000  C -2.999755000 1.551914000 6.963388000  C -1.069854000 2.391081000 8.102058000  C 0.405515000 2.101894000 8.315396000  C 1.501871000 3.313997000 6.546793000  C 2.023191000 3.130742000 5.140673000  C 2.192492000 2.848861000 2.276574000  C 2.211788000 2.657604000 0.891415000  C 1.121284000 2.066756000 0.247761000  C 0.000530000 1.649779000 0.990420000  H -2.171641000 -0.006062000 2.291613000  H -2.633324000 1.674785000 1.896351000  H -3.361613000 2.084137000 4.196514000  H -3.300529000 -0.557925000 6.700073000  H -4.554876000 0.460979000 5.949597000  H -3.597409000 1.617271000 7.882041000  H -3.104237000 2.495824000 6.412990000  H -1.576835000 2.418460000 9.075553000  H -1.223722000 3.356740000 7.604093000  H 0.531650000 1.120329000 8.780400000  H 0.844064000 2.862177000 8.971815000  H 2.284243000 3.760576000 7.172502000  H 0.635939000 3.984850000 6.529620000  H 2.299242000 4.107752000 4.731103000  H 2.888690000 2.461095000 5.106406000  H 3.052444000 3.288728000 2.766909000  H -0.821252000 1.159004000 0.484121000  H -4.237195000 0.684688000 3.518738000  O 2.763222000 -0.221071000 4.909029000  O 1.024720000 -1.465055000 3.209373000  O -0.950513000 -2.555814000 4.378047000  O -1.130862000 -2.035527000 7.077804000  O 1.621339000 -1.346038000 7.294684000  C 0.021539000 -1.861508000 2.361764000  C -1.079852000 -2.460073000 3.014052000  C -2.023203000 -3.130723000 5.140704000  C -1.501888000 -3.313961000 6.546828000  C -0.405539000 -2.101837000 8.315420000  C 1.069832000 -2.391026000 8.102090000  C 2.999736000 -1.551873000 6.963417000  C 3.481023000 -0.366216000 6.146370000  C 3.257027000 -1.050506000 3.848711000  C 2.285629000 -1.005985000 2.689676000  C -0.000532000 -1.649799000 0.990442000  C -1.121286000 -2.066779000 0.247784000  C -2.211791000 -2.657624000 0.891440000  C -2.192497000 -2.848871000 2.276600000  H -2.299254000 -4.107738000 4.731144000  H -2.888703000 -2.461076000 5.106426000  H -2.284263000 -3.760532000 7.172539000  H -0.844090000 -2.862112000 8.971847000  H -0.531675000 -1.120267000 8.780412000  H 1.223701000 -3.356691000 7.604137000  H 1.576809000 -2.418394000 9.075587000  H 3.597388000 -1.617219000 7.882073000  H 3.104220000 -2.495789000 6.413030000  H 4.554860000 -0.460951000 5.949618000  H 3.300511000 0.557963000 6.700078000  H 3.361602000 -2.084129000 4.196550000  H 4.237188000 -0.684688000 3.518760000  H 2.633321000 -1.674803000 1.896380000  H 2.171638000 0.006049000 2.291621000  H 0.821250000 -1.159027000 0.484141000  H -3.052450000 -3.288733000 2.766937000  H -0.635956000 -3.984815000 6.529664000  N -1.557189000 1.521808000 -4.803701000  H -1.430008000 1.897082000 -3.871388000  C -1.455365000 2.388100000 -5.856153000  C -1.351490000 3.832578000 -5.462233000  C -1.100550000 6.514533000 -4.848852000  C -0.741439000 4.706257000 -6.371564000  C -1.856949000 4.327005000 -4.249222000  C -1.741297000 5.676041000 -3.938688000  C -0.598007000 6.053307000 -6.064929000  H -0.363030000 4.314517000 -7.308140000  H -2.364949000 3.674883000 -3.547296000  H -2.119821000 6.070486000 -3.005508000  H -0.101717000 6.734498000 -6.743371000  O -1.439778000 2.039124000 -7.036915000  N 1.557192000 -1.521820000 -4.803753000  H 1.430004000 -1.897103000 -3.871444000  C 1.455374000 -2.388098000 -5.856216000  C 1.351502000 -3.832582000 -5.462317000  C 1.100588000 -6.514553000 -4.848991000  C 1.856946000 -4.327025000 -4.249306000  C 0.741477000 -4.706253000 -6.371674000  C 0.598059000 -6.053311000 -6.065067000  C 1.741306000 -5.676068000 -3.938798000  H 2.364927000 -3.674909000 -3.547361000  H 0.363080000 -4.314502000 -7.308250000  H 0.101791000 -6.734497000 -6.743531000  H 2.119820000 -6.070525000 -3.005620000  O 1.439799000 -2.039107000 -7.036973000  Ba -0.000007000 0.000012000 5.495284000  H -3.080708000 -2.952052000 0.313466000  H 3.080705000 2.952030000 0.313440000  N 0.922357000 -7.922714000 -4.500502000  O 1.459970000 -8.340624000 -3.472623000  O 0.227980000 -8.621863000 -5.241200000  N -0.922302000 7.922685000 -4.500332000  O -1.459924000 8.340583000 -3.472454000  O -0.227896000 8.621836000 -5.241002000 |
| 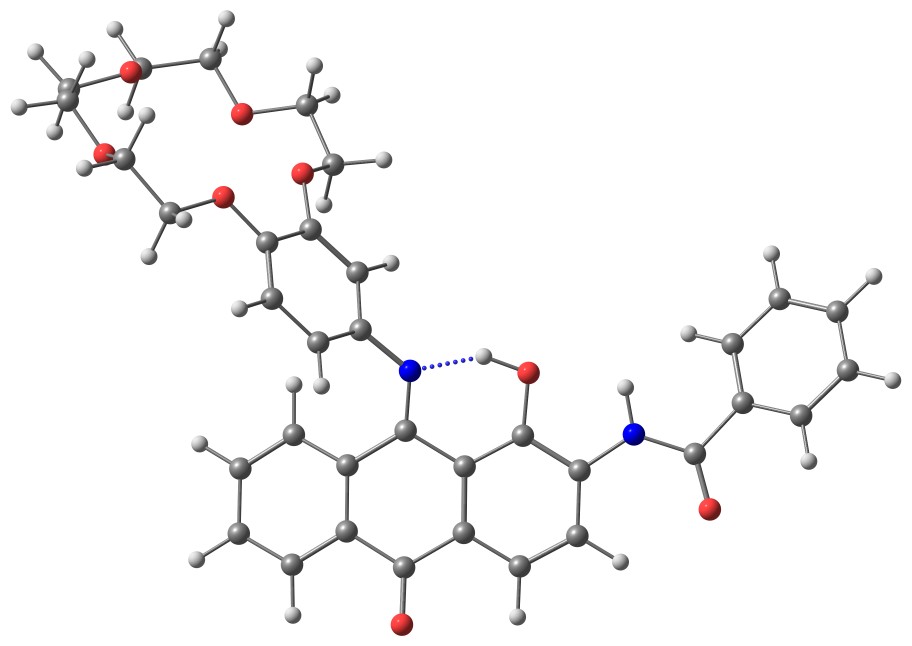 | 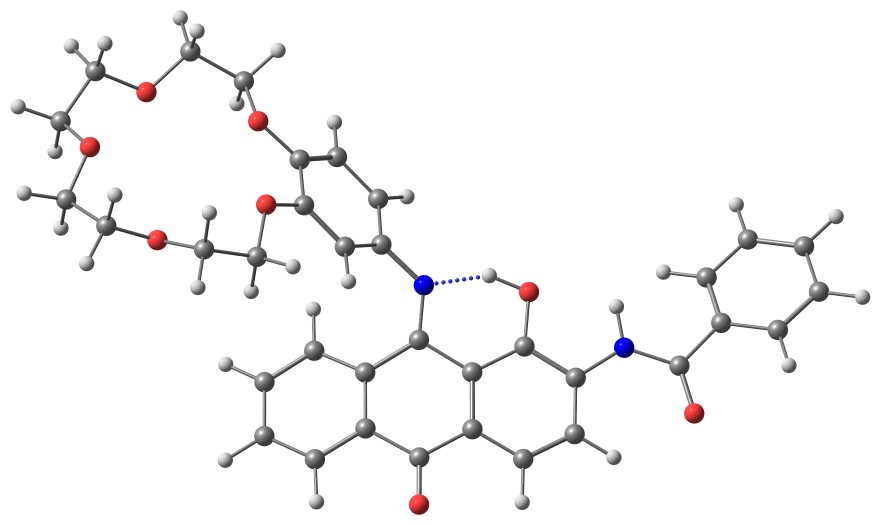 |
| *s-trans-***1** | *s-cis-***1** |
| DFT/CPCM energy = –2064.47874780 a.u. | DFT/CPCM energy = –2064.47994318 a.u. |
| Cartesian coordinates (Å):  C -2.800659000 1.716152000 -0.197843000  C -3.519288000 2.934634000 -0.292368000  C -4.913248000 2.930891000 -0.291821000  C -5.632107000 1.741301000 -0.209728000  C -4.949937000 0.527362000 -0.094871000  C -3.529532000 0.515917000 -0.069938000  C -1.327699000 1.715618000 -0.141725000  C -0.625503000 2.963943000 -0.537855000  C -1.342923000 4.179177000 -0.594846000  C -2.809578000 4.224844000 -0.367295000  C 0.719405000 2.963485000 -0.945107000  C 1.347084000 4.143844000 -1.330847000  C 0.649399000 5.356073000 -1.313892000  C -0.694030000 5.365886000 -0.958983000  N -0.765249000 0.599452000 0.222014000  O -3.410786000 5.301812000 -0.302971000  O -2.943407000 -0.686022000 0.076847000  N -5.548243000 -0.729030000 0.012211000  C -6.883317000 -1.038594000 0.083818000  C -7.196220000 -2.499914000 0.172843000  C -6.328616000 -3.502646000 -0.285959000  C -6.691980000 -4.844976000 -0.181932000  C -7.920189000 -5.197920000 0.381933000  C -8.792409000 -4.202622000 0.832019000  C -8.435303000 -2.861143000 0.721149000  O -7.774547000 -0.185653000 0.090493000  H -5.435258000 3.878497000 -0.357088000  H -6.711609000 1.742309000 -0.217676000  H 1.278454000 2.038918000 -0.975159000  H 2.385345000 4.116083000 -1.647043000  H 1.145904000 6.278063000 -1.600474000  H -1.272891000 6.282496000 -0.981336000  H -1.949418000 -0.482893000 0.186298000  H -4.881712000 -1.484516000 0.119599000  O 5.311494000 -2.440698000 -1.959761000  O 3.412140000 -1.850864000 -0.033364000  C 6.526149000 -3.125944000 -2.233007000  C 7.673398000 -2.163228000 -2.007954000  C 3.191995000 -0.069616000 1.484789000  O 7.723225000 -1.865210000 -0.622045000  O 4.471505000 -0.387442000 1.826400000  C 8.643841000 -0.839535000 -0.286025000  C 5.215390000 0.556044000 2.604558000  C 8.437663000 -0.494215000 1.174196000  C 6.650801000 0.080090000 2.635226000  O 7.152843000 0.097649000 1.310702000  C 4.209556000 -3.301488000 -1.730469000  C 3.037289000 -2.461880000 -1.273008000  C 2.611303000 -0.872477000 0.470506000  C 2.441816000 0.955699000 2.058950000  C 0.570851000 0.428626000 0.618973000  C 1.303183000 -0.635280000 0.062287000  C 1.137949000 1.210795000 1.628312000  H 6.543750000 -3.498316000 -3.268707000  H 6.637042000 -3.988207000 -1.559113000  H 8.614817000 -2.622104000 -2.348859000  H 7.512846000 -1.244555000 -2.593053000  H 8.470940000 0.050919000 -0.909866000  H 9.681960000 -1.170222000 -0.447172000  H 5.147475000 1.549461000 2.144623000  H 4.821097000 0.611658000 3.626802000  H 9.226587000 0.193678000 1.514760000  H 8.501373000 -1.411230000 1.778337000  H 7.232754000 0.740962000 3.296406000  H 6.696949000 -0.938721000 3.048285000  H 3.924797000 -3.844785000 -2.645023000  H 4.459008000 -4.045177000 -0.958750000  H 2.805966000 -1.684128000 -2.010900000  H 2.153914000 -3.098609000 -1.140633000  H 2.868918000 1.565467000 2.846277000  H 0.841550000 -1.243653000 -0.705926000  H 0.562234000 2.011737000 2.078988000  H -5.383033000 -3.248182000 -0.754827000  H -6.017923000 -5.613644000 -0.547778000  H -9.749602000 -4.472737000 1.268152000  H -9.105412000 -2.079184000 1.061644000  H -8.199312000 -6.244341000 0.464720000 | Cartesian coordinates (Å):  C -2.574593000 1.426764000 -0.307436000  C -2.922149000 2.787233000 -0.110033000  C -4.242411000 3.142894000 0.162910000  C -5.248606000 2.183220000 0.235135000  C -4.930373000 0.833161000 0.064447000  C -3.585198000 0.451432000 -0.184301000  C -1.173865000 1.038513000 -0.547442000  C -0.227597000 2.112078000 -0.943560000  C -0.559971000 3.461364000 -0.692086000  C -1.893880000 3.842960000 -0.162705000  C 0.963571000 1.835551000 -1.635654000  C 1.834393000 2.860769000 -1.991835000  C 1.537044000 4.188236000 -1.664533000  C 0.335343000 4.483551000 -1.032077000  N -0.895678000 -0.228054000 -0.416989000  O -2.142422000 5.009512000 0.158272000  O -3.347486000 -0.868069000 -0.298784000  N -5.836899000 -0.225941000 0.127838000  C -7.189028000 -0.187374000 0.355512000  C -7.878463000 -1.515808000 0.316638000  C -7.371850000 -2.625624000 -0.376773000  C -8.074734000 -3.830084000 -0.379208000  C -9.284379000 -3.938600000 0.310703000  C -9.797744000 -2.833588000 0.995767000  C -9.101980000 -1.627173000 0.992346000  O -7.805979000 0.854937000 0.590443000  H -4.476563000 4.189488000 0.319710000  H -6.271706000 2.463757000 0.435554000  H 1.210230000 0.818472000 -1.907181000  H 2.747476000 2.622097000 -2.528495000  H 2.226157000 4.984643000 -1.928185000  H 0.054300000 5.507724000 -0.813216000  H -2.331901000 -0.948504000 -0.353385000  H -5.400958000 -1.135566000 0.034705000  O 6.711043000 -2.619940000 -0.904307000  O 4.126035000 -2.573941000 0.099096000  C 8.091344000 -2.616199000 -0.566269000  C 8.564221000 -1.177857000 -0.532776000  C 2.608318000 -0.860628000 0.640176000  O 7.917781000 -0.535576000 0.554388000  O 3.629555000 -0.381070000 1.403091000  C 8.119256000 0.867970000 0.596374000  C 3.571984000 0.994680000 1.802385000  C 7.222266000 1.431437000 1.678531000  C 4.938387000 1.370576000 2.329949000  O 5.872385000 1.257370000 1.270673000  C 6.037217000 -3.816182000 -0.555364000  C 4.557758000 -3.609079000 -0.791536000  C 2.878806000 -2.059055000 -0.071346000  C 1.366992000 -0.252896000 0.526811000  C 0.631274000 -2.003826000 -0.980032000  C 1.883225000 -2.617612000 -0.870990000  C 0.378370000 -0.803998000 -0.313781000  H 8.677938000 -3.190486000 -1.299491000  H 8.242579000 -3.072105000 0.423247000  H 9.659026000 -1.148572000 -0.416278000  H 8.310554000 -0.677540000 -1.480069000  H 7.866463000 1.321242000 -0.374532000  H 9.169649000 1.111281000 0.821006000  H 3.305514000 1.616186000 0.938615000  H 2.819240000 1.138305000 2.587176000  H 7.450130000 2.496000000 1.841476000  H 7.407565000 0.895648000 2.621311000  H 4.898227000 2.398263000 2.723487000  H 5.216296000 0.701617000 3.158450000  H 6.381101000 -4.666045000 -1.165268000  H 6.216662000 -4.063359000 0.501839000  H 4.374220000 -3.303672000 -1.828754000  H 4.012750000 -4.540386000 -0.594277000  H 1.152162000 0.657570000 1.070795000  H 2.072863000 -3.536124000 -1.413367000  H -0.138999000 -2.440740000 -1.607126000  H -6.449173000 -2.554096000 -0.944880000  H -7.679728000 -4.680982000 -0.926043000  H -9.491848000 -0.760978000 1.515949000  H -10.739349000 -2.912763000 1.531038000  H -9.827842000 -4.879020000 0.309562000 |
| 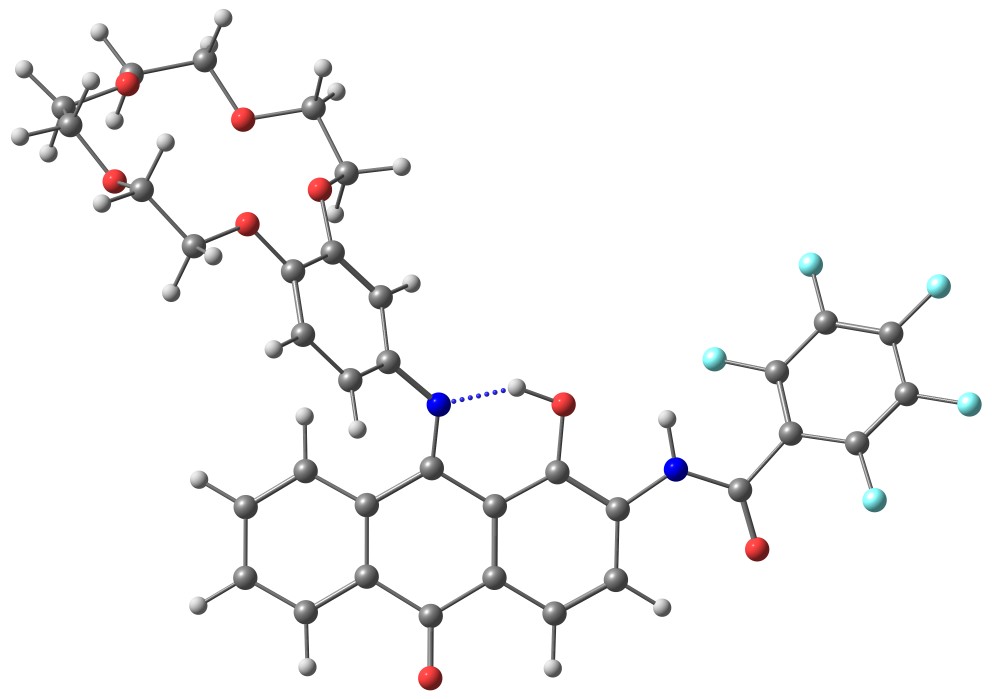 | 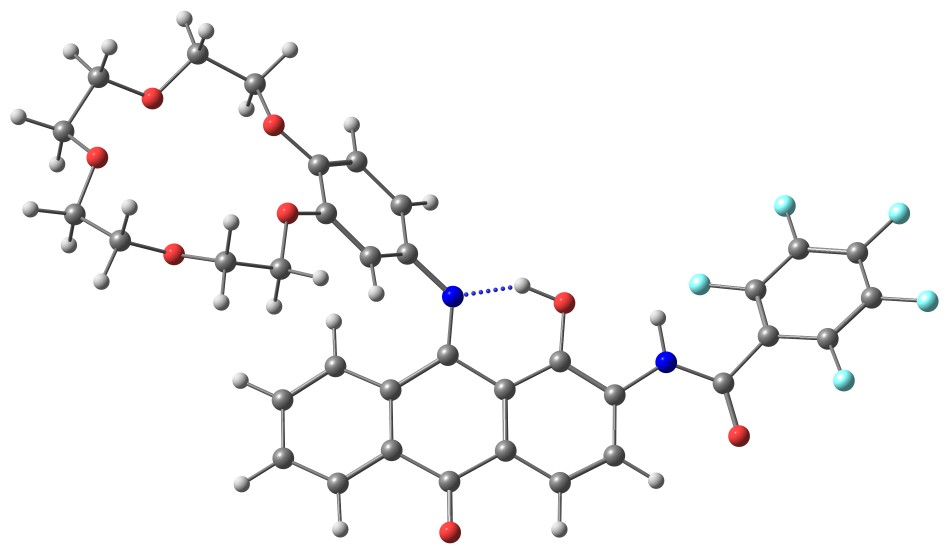 |
| *s-trans-***2** | *s-cis-***2** |
| DFT/CPCM energy = –2560.60353358 a.u. | DFT/CPCM energy = –2560.60466367 a.u. |
| Cartesian coordinates (Å):  C -1.556183000 2.486173000 -0.197304000  C -2.072563000 3.795798000 -0.355925000  C -3.449243000 4.010562000 -0.398669000  C -4.346685000 2.949836000 -0.306340000  C -3.863533000 1.650682000 -0.135551000  C -2.466100000 1.418438000 -0.052715000  C -0.102746000 2.256878000 -0.110136000  C 0.789856000 3.356158000 -0.560265000  C 0.277183000 4.667653000 -0.668066000  C -1.163892000 4.955347000 -0.456621000  C 2.114126000 3.121430000 -0.966792000  C 2.922102000 4.168860000 -1.398270000  C 2.430424000 5.478228000 -1.427421000  C 1.107974000 5.719273000 -1.075579000  N 0.270678000 1.087844000 0.322622000  O -1.586989000 6.114702000 -0.430806000  O -2.079679000 0.147660000 0.156191000  N -4.654248000 0.502793000 -0.013532000  C -6.010390000 0.398539000 -0.120931000  C -6.545501000 -1.002370000 0.016309000  C -5.936291000 -2.118699000 -0.565540000  C -6.493890000 -3.389106000 -0.490323000  C -7.697387000 -3.569445000 0.182659000  C -8.326561000 -2.481194000 0.778967000  C -7.756543000 -1.216654000 0.686170000  O -6.769991000 1.346661000 -0.301607000  H -3.815500000 5.024495000 -0.509020000  H -5.411946000 3.118572000 -0.355659000  H 2.515634000 2.117702000 -0.960001000  H 3.940183000 3.961056000 -1.712967000  H 3.068386000 6.295998000 -1.748211000  H 0.685048000 6.715890000 -1.135487000  H -1.070379000 0.197194000 0.294740000  H -4.118712000 -0.346139000 0.129201000  O 5.633410000 -3.044837000 -1.770814000  O 3.975671000 -2.034094000 0.214386000  C 6.728039000 -3.904736000 -2.057097000  C 8.000685000 -3.086328000 -1.986597000  C 4.089563000 -0.135470000 1.594863000  O 8.188221000 -2.694842000 -0.636016000  O 5.313460000 -0.626774000 1.933963000  C 9.236374000 -1.758180000 -0.445905000  C 6.241358000 0.259941000 2.569460000  C 9.181702000 -1.291046000 0.993734000  C 7.599648000 -0.404321000 2.529710000  O 7.983603000 -0.548650000 1.173539000  C 4.454070000 -3.725238000 -1.379110000  C 3.439067000 -2.694344000 -0.937583000  C 3.357816000 -0.904979000 0.655349000  C 3.529556000 1.034828000 2.105578000  C 1.563496000 0.724242000 0.732118000  C 2.095508000 -0.485128000 0.249717000  C 2.273747000 1.469725000 1.676544000  H 6.623362000 -4.356017000 -3.055556000  H 6.777641000 -4.718765000 -1.319032000  H 8.850337000 -3.687360000 -2.346865000  H 7.912669000 -2.200802000 -2.634682000  H 9.111652000 -0.899737000 -1.123732000  H 10.217776000 -2.213657000 -0.651749000  H 6.265313000 1.215361000 2.031698000  H 5.947603000 0.446426000 3.609834000  H 10.064532000 -0.675478000 1.224866000  H 9.192404000 -2.165507000 1.661059000  H 8.317170000 0.217224000 3.087829000  H 7.550638000 -1.388162000 3.020443000  H 4.030304000 -4.309639000 -2.210624000  H 4.668331000 -4.418610000 -0.551871000  H 3.264620000 -1.961889000 -1.734977000  H 2.488901000 -3.185297000 -0.693496000  H 4.070191000 1.618956000 2.841174000  H 1.519567000 -1.061511000 -0.463986000  H 1.848329000 2.384045000 2.075327000  F -4.773131000 -1.992653000 -1.227826000  F -5.886728000 -4.431694000 -1.067795000  F -8.242855000 -4.783609000 0.263200000  F -9.475877000 -2.657535000 1.440288000  F -8.394679000 -0.208903000 1.290665000 | Cartesian coordinates (Å):  C -1.383736000 1.910975000 -0.384063000  C -1.588556000 3.304585000 -0.230913000  C -2.867282000 3.808026000 0.003568000  C -3.971228000 2.963043000 0.078414000  C -3.793854000 1.583707000 -0.050621000  C -2.494939000 1.051296000 -0.256641000  C -0.028876000 1.369499000 -0.590215000  C 1.033288000 2.325694000 -0.994893000  C 0.842590000 3.708892000 -0.782411000  C -0.451092000 4.243851000 -0.289258000  C 2.201082000 1.907470000 -1.654840000  C 3.182733000 2.825378000 -2.015795000  C 3.023095000 4.184616000 -1.725530000  C 1.847804000 4.621540000 -1.126400000  N 0.109258000 0.084256000 -0.426596000  O -0.580279000 5.437192000 -0.000640000  O -2.397944000 -0.287780000 -0.328064000  N -4.811611000 0.627200000 0.035241000  C -6.158011000 0.836509000 0.107912000  C -6.987097000 -0.419325000 0.166655000  C -6.715311000 -1.560187000 -0.595485000  C -7.535829000 -2.681100000 -0.569207000  C -8.668492000 -2.681413000 0.237703000  C -8.965531000 -1.565016000 1.012791000  C -8.135593000 -0.450719000 0.967940000  O -6.689852000 1.943108000 0.142035000  H -2.991342000 4.877432000 0.127607000  H -4.961957000 3.358271000 0.245601000  H 2.343261000 0.863953000 -1.898408000  H 4.074919000 2.477239000 -2.527092000  H 3.798246000 4.896379000 -1.992244000  H 1.672799000 5.674787000 -0.936992000  H -1.395772000 -0.478282000 -0.362207000  H -4.477709000 -0.328911000 -0.013034000  O 7.473447000 -2.968817000 -0.827982000  O 4.880663000 -2.727371000 0.138978000  C 8.843099000 -3.097795000 -0.471911000  C 9.445726000 -1.709906000 -0.407778000  C 3.515520000 -0.891655000 0.683339000  O 8.847140000 -1.028808000 0.683206000  O 4.564779000 -0.518435000 1.466714000  C 9.159780000 0.353480000 0.742296000  C 4.623929000 0.848933000 1.893280000  C 8.299514000 0.976130000 1.821941000  C 6.009973000 1.090255000 2.447473000  O 6.944797000 0.919133000 1.396712000  C 6.691857000 -4.110145000 -0.521234000  C 5.239301000 -3.771859000 -0.773026000  C 3.686764000 -2.100588000 -0.040565000  C 2.337708000 -0.169817000 0.559301000  C 1.466846000 -1.830263000 -0.978163000  C 2.655848000 -2.557546000 -0.859415000  C 1.317071000 -0.618453000 -0.303124000  H 9.384967000 -3.711749000 -1.207503000  H 8.937294000 -3.582013000 0.511248000  H 10.537001000 -1.783295000 -0.278754000  H 9.250813000 -1.173261000 -1.349012000  H 8.953475000 0.835273000 -0.225817000  H 10.223939000 0.509969000 0.979142000  H 4.429661000 1.508565000 1.038654000  H 3.873862000 1.044619000 2.669346000  H 8.612380000 2.016249000 2.000841000  H 8.428674000 0.415689000 2.759625000  H 6.054678000 2.108320000 2.864744000  H 6.216059000 0.380455000 3.262838000  H 6.971504000 -4.971134000 -1.148277000  H 6.831660000 -4.398429000 0.531508000  H 5.098305000 -3.425758000 -1.804111000  H 4.615578000 -4.659053000 -0.608358000  H 2.200083000 0.751532000 1.110102000  H 2.768693000 -3.483648000 -1.410228000  H 0.670104000 -2.186448000 -1.622960000  F -5.631965000 -1.607521000 -1.390723000  F -7.246902000 -3.750306000 -1.319021000  F -9.463587000 -3.751341000 0.274580000  F -10.045632000 -1.570602000 1.801947000  F -8.458062000 0.585183000 1.749749000 |
| 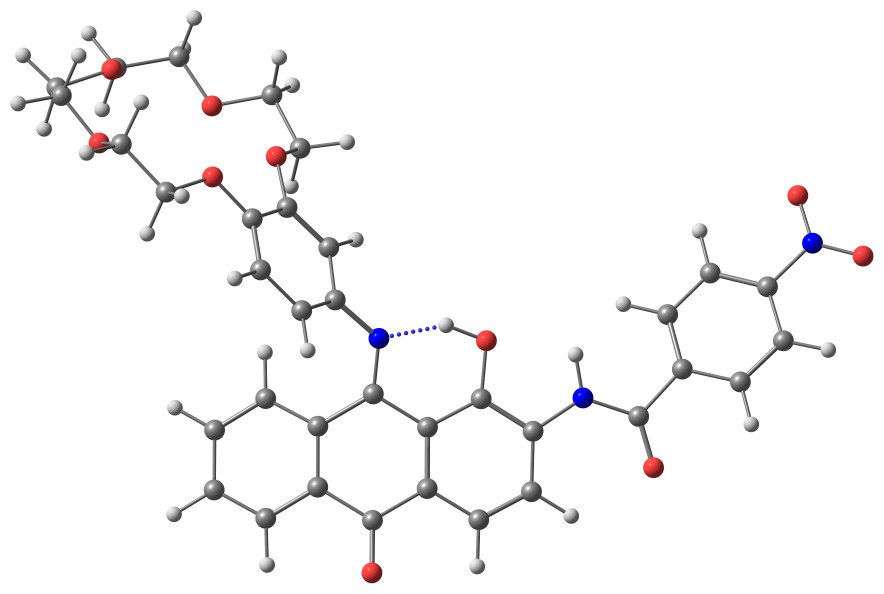 | 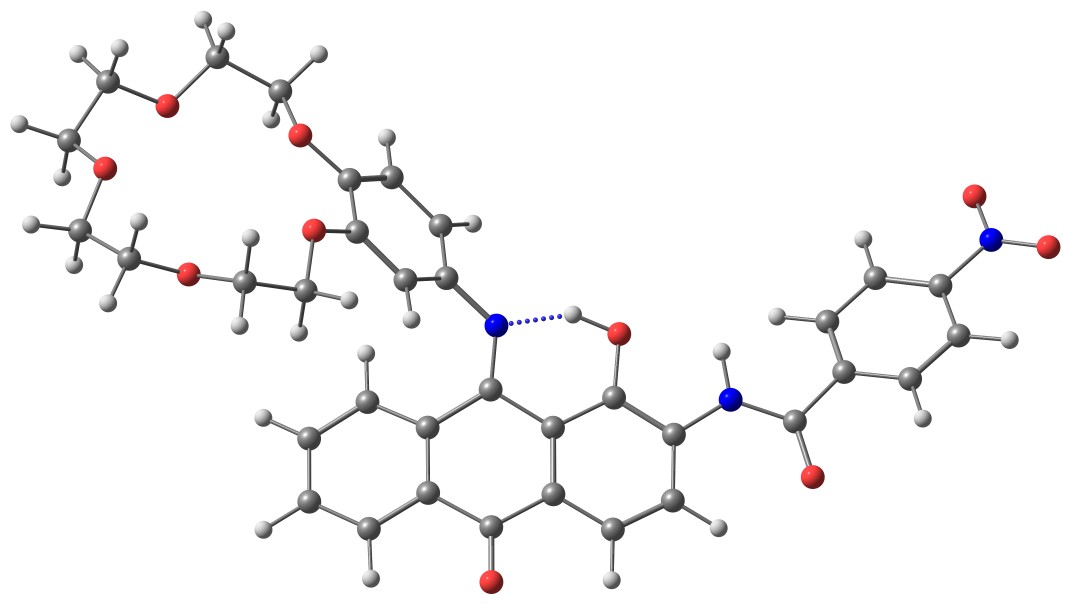 |
| *s-trans-***3** | *s-cis-***3** |
| DFT/CPCM energy = –2268.98890384 a.u. | DFT/CPCM energy = –2268.99009989 a.u. |
| Cartesian coordinates (Å):  C -1.821886000 2.522538000 -0.150540000  C -2.309576000 3.846524000 -0.280072000  C -3.681370000 4.091547000 -0.319770000  C -4.601757000 3.049018000 -0.250934000  C -4.147684000 1.736161000 -0.104764000  C -2.754984000 1.472451000 -0.028222000  C -0.373757000 2.259521000 -0.070249000  C 0.542675000 3.350078000 -0.493599000  C 0.058521000 4.674630000 -0.569202000  C -1.376536000 4.988040000 -0.352773000  C 1.862360000 3.097453000 -0.904421000  C 2.693409000 4.137842000 -1.308301000  C 2.229974000 5.457737000 -1.305203000  C 0.912296000 5.718043000 -0.949242000  N -0.025299000 1.072504000 0.333622000  O -1.774456000 6.155539000 -0.300148000  O -2.396613000 0.188941000 0.153164000  N -4.963292000 0.605021000 -0.011705000  C -6.326728000 0.531632000 -0.075134000  C -6.896429000 -0.856342000 0.009913000  C -6.178499000 -2.005267000 -0.354034000  C -6.773062000 -3.259986000 -0.273449000  C -8.089482000 -3.347049000 0.174853000  C -8.830068000 -2.221479000 0.534380000  C -8.225090000 -0.974812000 0.442079000  O -7.064217000 1.512804000 -0.183210000  H -4.025310000 5.115371000 -0.408864000  H -5.663253000 3.240504000 -0.297385000  H 2.242573000 2.085671000 -0.922532000  H 3.707439000 3.916191000 -1.626611000  H 2.885900000 6.269486000 -1.604356000  H 0.510772000 6.724636000 -0.984571000  H -1.386263000 0.213012000 0.290632000  H -4.447019000 -0.251010000 0.155328000  O 5.268183000 -3.083067000 -1.890927000  O 3.627865000 -2.106781000 0.127411000  C 6.348790000 -3.951745000 -2.202861000  C 7.635436000 -3.158743000 -2.102505000  C 3.773045000 -0.252790000 1.564946000  O 7.825798000 -2.814407000 -0.739509000  O 4.989615000 -0.772916000 1.887126000  C 8.894762000 -1.909068000 -0.516324000  C 5.931298000 0.079749000 2.548440000  C 8.844370000 -1.485129000 0.936709000  C 7.277794000 -0.607008000 2.493336000  O 7.663056000 -0.720741000 1.134598000  C 4.077714000 -3.755136000 -1.519026000  C 3.080538000 -2.721457000 -1.044573000  C 3.028471000 -0.981770000 0.603441000  C 3.232134000 0.910146000 2.111781000  C 1.260710000 0.673049000 0.731718000  C 1.772696000 -0.529535000 0.212232000  C 1.983118000 1.377766000 1.697769000  H 6.239281000 -4.367975000 -3.215921000  H 6.382040000 -4.790394000 -1.491948000  H 8.475314000 -3.763111000 -2.479759000  H 7.565642000 -2.251269000 -2.721971000  H 8.793658000 -1.027522000 -1.167913000  H 9.866091000 -2.381186000 -0.732238000  H 5.972908000 1.048934000 2.036971000  H 5.638397000 0.243018000 3.592963000  H 9.740295000 -0.897858000 1.190065000  H 8.831555000 -2.379657000 1.576857000  H 8.004735000 -0.014122000 3.070127000  H 7.209745000 -1.602997000 2.956506000  H 3.643351000 -4.306095000 -2.367714000  H 4.280723000 -4.477398000 -0.713980000  H 2.918725000 -1.961461000 -1.818501000  H 2.122146000 -3.203693000 -0.815747000  H 3.782852000 1.463053000 2.863827000  H 1.187183000 -1.073817000 -0.518629000  H 1.572813000 2.286502000 2.124316000  H -5.163756000 -1.938094000 -0.730909000  H -6.233038000 -4.153398000 -0.558358000  H -9.851509000 -2.326366000 0.876143000  H -8.775352000 -0.079696000 0.707003000  N -8.719004000 -4.666258000 0.264393000  O -8.050253000 -5.653381000 -0.048898000  O -9.888314000 -4.728213000 0.649720000 | Cartesian coordinates (Å):  C -1.665365000 1.977269000 -0.325217000  C -1.832742000 3.371607000 -0.134107000  C -3.096295000 3.900343000 0.125941000  C -4.220447000 3.081776000 0.191437000  C -4.079735000 1.701380000 0.028844000  C -2.796315000 1.142938000 -0.206481000  C -0.326584000 1.407491000 -0.557101000  C 0.755116000 2.346567000 -0.949550000  C 0.602137000 3.728202000 -0.700189000  C -0.672470000 4.282854000 -0.179367000  C 1.904245000 1.915470000 -1.633518000  C 2.905076000 2.816910000 -1.982957000  C 2.783758000 4.171901000 -1.656329000  C 1.626877000 4.623294000 -1.032514000  N -0.218107000 0.115708000 -0.424082000  O -0.767579000 5.471280000 0.141602000  O -2.733755000 -0.196203000 -0.314035000  N -5.122582000 0.772313000 0.085297000  C -6.452095000 0.999620000 0.308639000  C -7.324219000 -0.222495000 0.257790000  C -7.007038000 -1.357154000 -0.503680000  C -7.869929000 -2.447676000 -0.530889000  C -9.046449000 -2.385939000 0.213166000  C -9.391096000 -1.267659000 0.971958000  C -8.524165000 -0.182738000 0.982013000  O -6.931481000 2.109401000 0.546712000  H -3.192455000 4.969171000 0.276891000  H -5.199356000 3.496203000 0.379864000  H 2.016581000 0.874964000 -1.904483000  H 3.782213000 2.459439000 -2.513486000  H 3.574014000 4.870246000 -1.914064000  H 1.481338000 5.675476000 -0.814438000  H -1.737195000 -0.410689000 -0.362924000  H -4.813134000 -0.188679000 -0.005646000  O 7.073075000 -3.092667000 -0.919508000  O 4.492201000 -2.811568000 0.065179000  C 8.441796000 -3.256874000 -0.574576000  C 9.076344000 -1.883726000 -0.500148000  C 3.173045000 -0.953055000 0.645453000  O 8.502291000 -1.201383000 0.603165000  O 4.235379000 -0.614342000 1.426920000  C 8.841266000 0.174193000 0.671703000  C 4.327214000 0.744995000 1.872987000  C 8.003836000 0.802584000 1.765989000  C 5.723139000 0.949394000 2.417069000  O 6.643874000 0.775805000 1.354393000  C 6.269085000 -4.222160000 -0.627605000  C 4.822796000 -3.848759000 -0.865611000  C 3.312194000 -2.154589000 -0.097510000  C 2.010662000 -0.203823000 0.540611000  C 1.092835000 -1.819998000 -1.016246000  C 2.265865000 -2.575588000 -0.916162000  C 0.974426000 -0.615852000 -0.321535000  H 8.964369000 -3.874890000 -1.320664000  H 8.531743000 -3.753944000 0.402584000  H 10.166690000 -1.983111000 -0.381124000  H 8.885984000 -1.332618000 -1.433899000  H 8.634065000 0.668760000 -0.289766000  H 9.910491000 0.308796000 0.898947000  H 4.139077000 1.421258000 1.030117000  H 3.588671000 0.944710000 2.659022000  H 8.338373000 1.834725000 1.951611000  H 8.131815000 0.230657000 2.696855000  H 5.792603000 1.959724000 2.849466000  H 5.922598000 0.222987000 3.219371000  H 6.527148000 -5.078194000 -1.270472000  H 6.408036000 -4.531076000 0.419404000  H 4.683539000 -3.483043000 -1.890132000  H 4.180960000 -4.724853000 -0.711455000  H 1.896584000 0.711216000 1.106982000  H 2.354330000 -3.495963000 -1.480896000  H 0.284240000 -2.148570000 -1.660968000  H -6.104182000 -1.393810000 -1.104042000  H -7.642208000 -3.326244000 -1.120212000  H -8.766737000 0.705098000 1.554163000  H -10.315002000 -1.254213000 1.535432000  N -9.956629000 -3.532960000 0.190436000  O -9.643110000 -4.512180000 -0.489652000  O -10.993969000 -3.466045000 0.853043000 |

# **VIII** **Tables S4**–**S9:** DFT calculated free energies in solution (*G*soln)

**Table S4. Most stable *s*-*trans* and *s*-*cis* conformers of dye 1.**

| *s*-*trans-***1** | *s*-*cis-***1** |
| --- | --- |
| *E*gas = –2065.22859762 a.u.  *G*corr_gas = 0.528149 a.u.  *G*solv = –0.04109062 a.u.  *G*soln= *E*gas + *G*corr_gas + *G*solv =  **–2064.7415392 a.u.** | *E*gas = –2065.22965104 a.u.  *G*corr_gas = 0.528338 a.u.  *G*solv = –0.04095281 a.u.  *G*soln= *E*gas + *G*corr_gas + *G*solv =  **–2064.7422658 a.u.** |
| *G*soln(*trans*) – *G*soln(*cis*) = +0.46 kcal/mol | |

**Table S5. Most stable *s*-*trans* and *s*-*cis* conformers of dye 2.**

| *s*-*trans-***2** | *s*-*cis-***2** |
| --- | --- |
| *E*gas = –2561.59390705 a.u.  *G*corr_gas = 0.48102123 a.u.  *G*solv = –0.03989888 a.u.  *G*soln= *E*gas + *G*corr_gas + *G*solv =  **–2561.1527847 a.u.** | *E*gas = –2561.59486616 a.u.  *G*corr_gas = 0.48127904 a.u.  *G*solv = –0.0396041 a.u.  *G*soln= *E*gas + *G*corr_gas + *G*solv =  **–2561.15319122 a.u.** |
| *G*soln(*trans*) – *G*soln(*cis*) = +0.26 kcal/mol | |

**Table S6. Most stable *s*-*trans* and *s*-*cis* conformers of dye 3.**

| *s*-*trans-***3** | *s*-*cis-***3** |
| --- | --- |
| *E*gas = –2269.82184883 a.u.  *G*corr_gas = 0.5263845 a.u.  *G*solv = –0.04552874 a.u.  *G*soln= *E*gas + *G*corr_gas + *G*sol =  **–2269.34099307 a.u.** | *E*gas = –2269.82290519 a.u.  *G*corr_gas = 0.5264987 a.u.  *G*solv = –0.04519772 a.u.  *G*soln= *E*gas + *G*corr_gas + *G*sol =  **–2269.34160421 a.u.** |
| *G*soln(*trans*) – *G*soln(*cis*) = +0.38 kcal/mol | |

**Table S7.** Most stable conformers of the sandwich complex of dye **1**·with Ba2+.

| *in*-[*anti*-(*s*-*trans*-**1**)2]**·**Ba2+ | *out*-[*anti*-(*s*-*trans*-**1**)2]**·**Ba2+ |
| --- | --- |
| *E*gas = –4155.804100 a.u.  *G*corr_gas = 1.100208 a.u.  *G*solv = –0.241799 a.u.  *G*soln= *E*gas + *G*corr_gas + *G*sol =  **–4154.945691 a.u.** | *E*gas = –4155.804562 a.u.  *G*corr_gas = 1.101881 a.u.  *G*solv = –0.242185 a.u.  *G*soln= *E*gas + *G*corr_gas + *G*sol =  **–4154.944866 a.u.** |
| *G*soln(*in*) – *G*soln(*out*) = –0.52 kcal/mol | |

**Table S8.** Most stable conformers of the sandwich complex of dye **2**·with Ba2+.

| *in*-[*anti*-(*s*-*trans*-**2**)2]**·**Ba2+ | *out*-[*anti*-(*s*-*trans*-**2**)2]**·**Ba2+ |
| --- | --- |
| *E*gas = –5148.534569 a.u.  *G*corr_gas = 1.009485 a.u.  *G*solv = –0.24117 a.u.  *G*soln= *E*gas + *G*corr_gas + *G*sol =  **–5147.766254 a.u.** | *E*gas = –5148.536541 a.u.  *G*corr_gas = 1.011686 a.u.  *G*solv = –0.241927 a.u.  *G*soln= *E*gas + *G*corr_gas + *G*sol =  **–5147.766782 a.u.** |
| *G*soln(*in*) – *G*soln(*out*) = +0.33 kcal/mol | |

**Table S9.** Most stable conformers of the sandwich complex of dye **3**·with Ba2+.

| *in*-[*anti*-(*s*-*trans*-**3**)2]**·**Ba2+ | *out*-[*anti*-(*s*-*trans*-**3**)2]**·**Ba2+ |
| --- | --- |
| *E*gas = –4564.986840 a.u.  *G*corr_gas = 1.097491 a.u.  *G*solv = –0.257122 a.u.  *G*soln= *E*gas + *G*corr_gas + *G*sol =  **–4564.146471 a.u.** | *E*gas(def2) = –4564.991056 a.u.  *G*corr_gas = 1.101302 a.u.  *G*solv = –0.254311 a.u.  *G*soln= *E*gas + *G*corr_gas + *G*sol =  **–4564.144065 a.u.** |
| *G*soln(*in*) – *G*soln(*out*) = –1.51 kcal/mol | |

# **IX** **Table S10, Figure S17:** Stacking parameters from DFT calculations in solution

**Table S10.** Stacking parameters *h*, *r*, and ** (see Figure S17) for the most stable conformers of complexes (**1**–**3**)2**·**Ba2+, as derived from DFT calculations; the symbols **A**–**E** denote different rings in the dye (see designations in the Introduction section).

| Stacking parameters | *in*-(**1**)2**·**Ba2+ | *in*-(**2**)2**·**Ba2+ | *in*-(**3**)2**·**Ba2+ | *out*-(**1**)2**·**Ba2+ | *out*-(**2**)2**·**Ba2+ | *out*-(**3**)2**·**Ba2+ |
| --- | --- | --- | --- | --- | --- | --- |
| *h* (**A,E**) *a* | 3.140 | 3.112 | 3.119 | 3.442 | 3.333 | 3.434 |
| *r* (**A,E**) | 2.467 | 1.968 | 2.199 | 1.808 | 1.716 | 1.750 |
| ** (**A,E**) | 19.81 | 13.44 | 14.22 | 9.49 | 16.06 | 11.92 |
| *h* (**D,D**) | 3.472 | 3.560 | 3.494 | 3.147 | 3.141 | 3.164 |
| *r* (**D**,**D**) | 1.382 | 1.631 | 1.463 | 3.898 | 3.898 | 3.897 |
| ** (**D,D**) | 2.99 | 6.52 | 4.73 | 15.86 | 16.32 | 15.57 |
| *h* (**C,C**) | 3.338 | 3.343 | 3.354 | 3.276 | 3.268 | 3.269 |
| *r* (**C,C**) | 0.614 | 0.781 | 0.694 | 2.612 | 2.736 | 2.798 |
| ** (**C,C**) | 3.11 | 3.70 | 3.83 | 15.85 | 16.73 | 16.64 |

*a* The distance between the plane of ring **A** and the centre of ring **E**.

**Figure S17.** Definition of stacking parameters *h*, *r*, and **: *h* (staking distance) is the distance between the centre of one ring and the plane defined by the neighbouring ring; *r* (displacement) is the distance between the centres of two rings projected on the plane defined by one of the rings; ** (inclination) is the angle between the planes of two rings.

1. *Corresponding author. E-mail address: martyanov.t@gmail.com (T. P. Martyanov)* [↑](#footnote-ref-2)
